# Supplementary material for: Efficient construction of biologically important functionalized polycyclic spiro-fused carbocyclicoxindoles via an asymmetric organocatalytic quadruple-cascade reaction
Source: Royal Society of Chemistry journal article supplement (doi:10.1039/c6ra24910h), 2017-01-01
Supplement: c6ra24910h1.pdf [file c6ra24910h1.pdf]

Supporting Information for:

Efficient Construction of Biologically Important Functionalized Polycyclic Spiro-  
fused Carbocyclooxindoles via an Asymmetric Organocatalytic Quadruple-Cascade  
Reaction

Wen Ren,<sup>a,d</sup> Xiao-Yan Wang,<sup>b,d</sup> Jing-Jing Li,<sup>a</sup> Mao Tian,<sup>a</sup> Jie Liu,<sup>a,\*</sup> Liang Ouyang,<sup>a</sup>  
Jin-Hui Wang<sup>c,\*</sup>

a. State Key Laboratory of Biotherapy and Cancer Center, West China Hospital, Sichuan University, and Collaborative Innovation Center for Biotherapy, Chengdu 610041, China. Fax: (+86)-028-8550-3817; phone: (+86)-028-8550-3817; E-mail: liujie2011@scu.edu.cn, hegusc2015@163.com

b. Analytical & Testing Center, Sichuan University, Chengdu 610064, China

c. College of Pharmacy, Xinjiang Medical University, Urumqi 830011, China. E-mail: wangjinhui2015@sina.com

d. Contribute equally

**Contents:**

|                                                                                 |     |
|---------------------------------------------------------------------------------|-----|
| (A) General Information.....                                                    | S2  |
| (B) Representative Procedure for the Asymmetric Catalysis.....                  | S2  |
| (C) Tables for the Optimization of the Reaction Conditions.....                 | S3  |
| (D) Tables for the Investigation of Substrate Scope.....                        | S7  |
| (E) Synthesis of several Substituted Oxindole.....                              | S12 |
| (F) Synthesis of Substituted ( <i>E</i> )-3-(2-hydroxybenzylidene)Oxindole..... | S12 |
| (G) Biological Activity study.....                                              | S12 |
| (H) Analytical and Spectral Characterization Data .....                         | S15 |
| (I) References.....                                                             | S39 |
| (J) Copies of NMR Spectra.....                                                  | S40 |
| (K) Crystal Structure and data for compound <b>5ka</b> .....                    | S75 |

## (A) General Information.

NMR spectra were recorded on the commercial 400 MHz spectrometer. The chemical shifts were recorded in ppm relative to tetramethylsilane (TMS) and with the solvent resonance as the internal standard. <sup>1</sup>H NMR data are reported as follows: chemical shift, multiplicity (s = singlet, d = doublet, t = triplet, q = quartet, m = multiplet, dd = doublet of doublet, dt = doublet of triplet, dq = doublet of quartet), coupling constants (Hz), integration. <sup>13</sup>C NMR data were collected at 100 MHz with complete proton decoupling. Enantiomeric excesses (ee) were determined by chiral HPLC analysis on DAICEL CORPORATION AS-H and AD-H columns in comparison with the authentic racemates. Optical rotations were reported as follows:  $[\alpha]_D^{25}$  (c: g/100 mL, in solvent). ESI-HRMS spectra were recorded on a commercial apparatus and methanol was used to dissolve the sample. Substituted (*E*)-3-(2-hydroxybenzylidene)oxindole **1** were prepared by Knoevenagel condensation of corresponding Salicylaldehyde derivatives and Oxindole derivatives.<sup>1</sup>  $\alpha$ ,  $\beta$ -unsaturated aldehydes **2**, diphenylprolinol silyl ether catalysts **3**, additives **4** and solvents were commercially available and used directly without further purification. Several substituted oxindoles were prepared according to the literatures and references therein.<sup>2</sup>

## (B) Representative Procedure for the Asymmetric Catalysis

### 1. Procedure for the optimization of reaction conditions

Crotonaldehyde **2a** (0.244 mmol, 20  $\mu$ L) was added to a dry tube containing a suspension of (*E*)-3-(2-hydroxybenzylidene)oxindole **1a** (0.1 mmol), chiral diphenylprolinol silyl ether catalyst **3** (20 mol %), additive **4** and dry solvent 1 mL. The mixture was stirred at 40 °C or 60 °C. The reaction progress was detected by TLC. After the time indicated in Tables, reaction mixture was subjected to silica gel column chromatography to yield the corresponding product (petroleum ether/ ethyl acetate, 2/1, *V/V*).

### 2. Procedure for the investigation of substrate scope

$\alpha$ ,  $\beta$ -unsaturated aldehydes **2** (0.244 mmol) was added to a dry tube containing a suspension of substituted (*E*)-3-(2-hydroxybenzylidene)oxindole **1** (0.1 mmol),  $\alpha$ , $\alpha$ -L-diphenylprolinol trimethylsilyl ether **3a** (20 mol%), 2-(trifluoromethyl)benzoic acid **4h** (60 mol%) and CHCl<sub>3</sub> 1 mL. The mixture was stirred at 40 °C for 24 h and then heated up to 60 °C for 12 h. The reaction mixture was subjected to silica gel column

chromatography to yield the corresponding product (generally petroleum ether/ ethyl acetate, 2/1, *V/V*; for **5ia**: dichloromethane/ethyl acetate, 30/1, *V/V*; for **5ma**: petroleum ether/ethyl acetate, 3/1, *V/V*; for **5na**: dichloromethane/methanol, 100/1, *V/V*; for **5ta**: petroleum ether/ethyl acetate, 7/1, *V/V*).

### (C) Tables for the Optimization of the Reaction Conditions

#### 1. Investigation of structures of chiral diphenylprolinol silyl ether catalysts on results

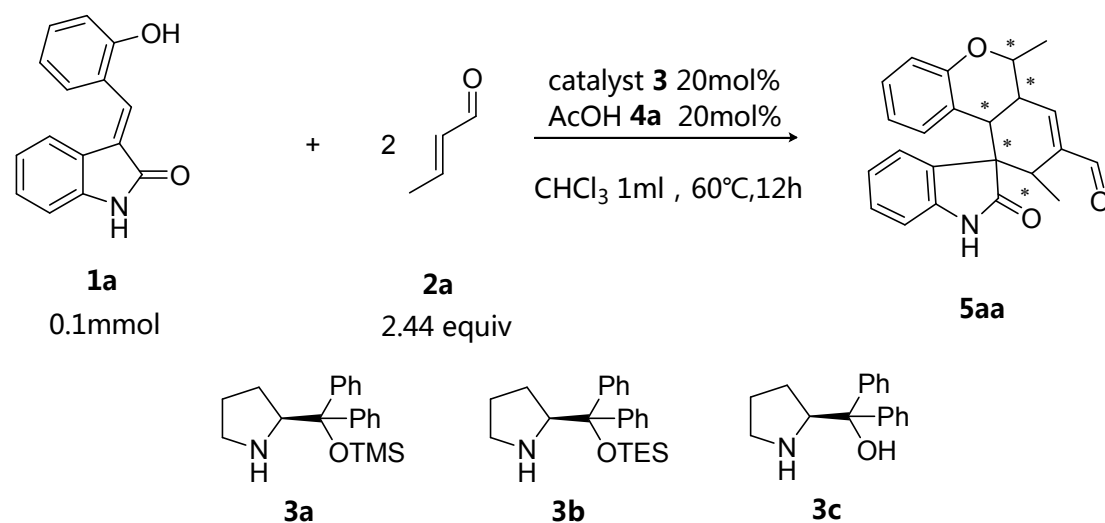

**Table S1. Investigation of catalysts<sup>a</sup>**

| Entry | Catalyst  | Yield (%) <sup>b</sup> | Dr <sup>c</sup> | Ee(%) <sup>d</sup> |
|-------|-----------|------------------------|-----------------|--------------------|
| 1     | <b>3a</b> | 60                     | 1:1             | 98; 90             |
| 2     | <b>3b</b> | 55                     | 1:1             | 92; 90             |
| 3     | <b>3c</b> | Traces                 | n.d.            | n.d.               |

<sup>a</sup> Reactions were performed with 0.1 mmol **1a** and 0.244 mmol (20  $\mu$ L) **2a** in the presence of catalyst **3** (20 mol %) and the additive AcOH **4a** (20 mol %) in CHCl<sub>3</sub> at 60 °C for 12 h.

<sup>b</sup> The values are yields of isolated product after silica gel column chromatography.

<sup>c</sup> Determined by <sup>1</sup>H NMR on the crude reaction mixture.

<sup>d</sup> Determined by chiral HPLC.

Trace: little products were detected. n.d.: not determined.

## 2. The influence of additives on the result<sup>a</sup>

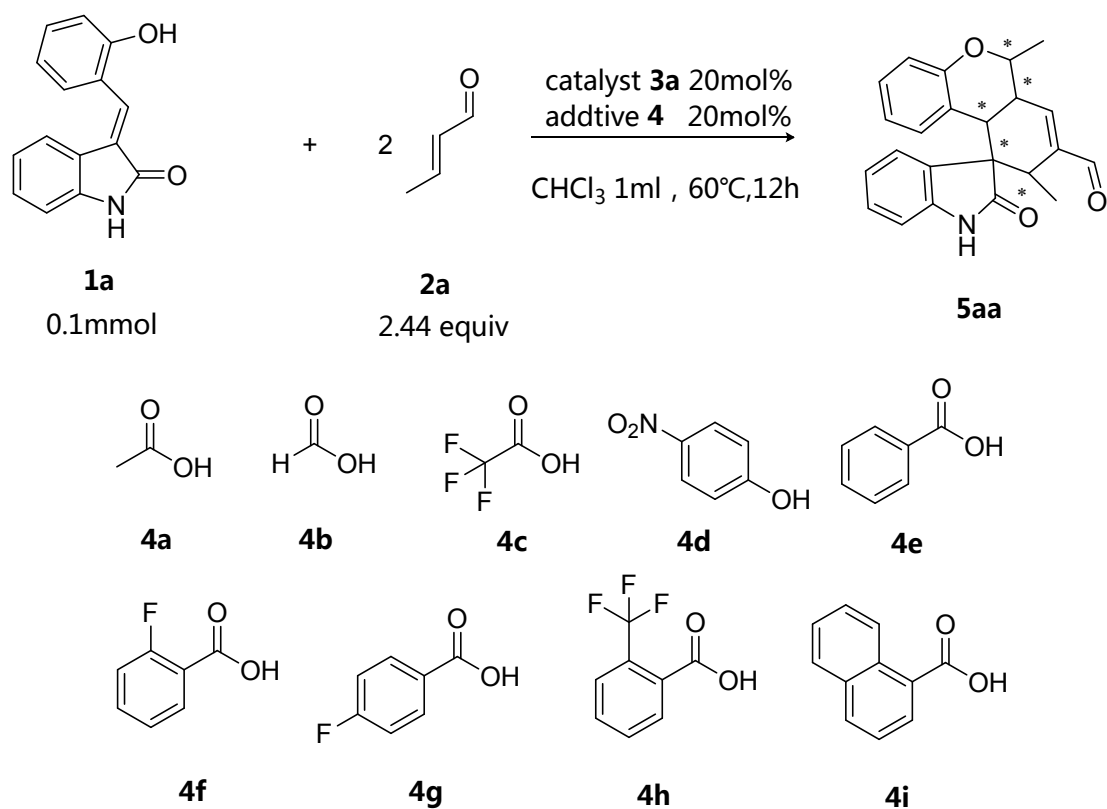

**Table S2. The influence of additives<sup>a</sup>**

| Entry | Additive  | Yield (%) <sup>b</sup> | Dr <sup>c</sup> | Ee(%) <sup>d</sup> |
|-------|-----------|------------------------|-----------------|--------------------|
| 1     | <b>4a</b> | 60                     | 1:1             | 98; 90             |
| 2     | <b>4b</b> | Traces                 | n.d.            | n.d.               |
| 3     | <b>4c</b> | Traces                 | n.d.            | n.d.               |
| 4     | <b>4d</b> | Traces                 | n.d.            | n.d.               |
| 5     | <b>4e</b> | 63                     | 1:1             | 98; 93             |
| 6     | <b>4f</b> | 65                     | 1:1             | 98; 94             |
| 7     | <b>4g</b> | 61                     | 1:1             | 98; 91             |
| 8     | <b>4h</b> | 68                     | 2:1             | >99; 94            |
| 9     | <b>4i</b> | 58                     | 1:1             | 97; 93             |

<sup>a</sup> Reactions were performed with 0.1 mmol **1a** and 0.244 mmol (20  $\mu$ L) **2a** in the presence of the catalyst **3a** (20 mol%) and additive **4** (20 mol%) in CHCl<sub>3</sub> at 60 °C for 12h.

<sup>b</sup> The values are yields of isolated product after silica gel column chromatography.

<sup>c</sup> Determined by <sup>1</sup>H NMR on the crude reaction mixture.

<sup>d</sup> Determined by chiral HPLC.

N.D.: not detected. Trace: little products were detected.

### 3. Solvent effect<sup>a</sup>

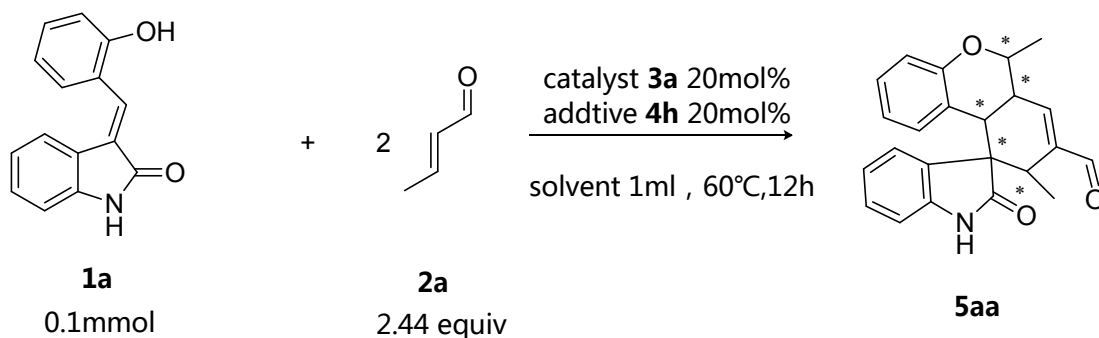

**Table S3. The influence of solvent<sup>a</sup>**

| Entry | Solvent | Yield (%) <sup>b</sup> | Dr <sup>c</sup> | Ee(%) <sup>d</sup> |
|-------|---------|------------------------|-----------------|--------------------|
| 1     | MeOH    | n.r.                   | n.d.            | n.d.               |
| 2     | EtOH    | n.r.                   | n.d.            | n.d.               |
| 3     | THF     | n.r.                   | n.d.            | n.d.               |
| 4     | dioxane | n.r.                   | n.d.            | n.d.               |
| 5     | anisole | 44                     | 1:2             | >99; 92            |
| 6     | MTBE    | n.r.                   | n.d.            | n.d.               |
| 7     | toluene | 55                     | 1:1             | >99; 92            |
| 8     | MeCN    | n.r.                   | n.d.            | n.d.               |
| 9     | EA      | n.r.                   | n.d.            | n.d.               |
| 10    | DMF     | n.r.                   | n.d.            | n.d.               |

|    |                   |    |     |         |
|----|-------------------|----|-----|---------|
| 11 | CHCl <sub>3</sub> | 68 | 2:1 | >99; 94 |
|----|-------------------|----|-----|---------|

<sup>a</sup> Reactions were performed with 0.1 mmol **1a** and 0.244 mmol (20 μL) **2a** in the presence of the catalyst **3a** (20 mol %) and the additive **4h** (20 mol %) in solvent at 60 °C for 12 h.

<sup>b</sup> The values are yields of isolated product after silica gel column chromatography.

<sup>c</sup> Determined by <sup>1</sup>H NMR on the crude reaction mixture.

<sup>d</sup> Determined by chiral HPLC.

n.r. : no reaction. n.d.: not detected.

#### 4. Investigation of the dosage of additive<sup>a</sup>

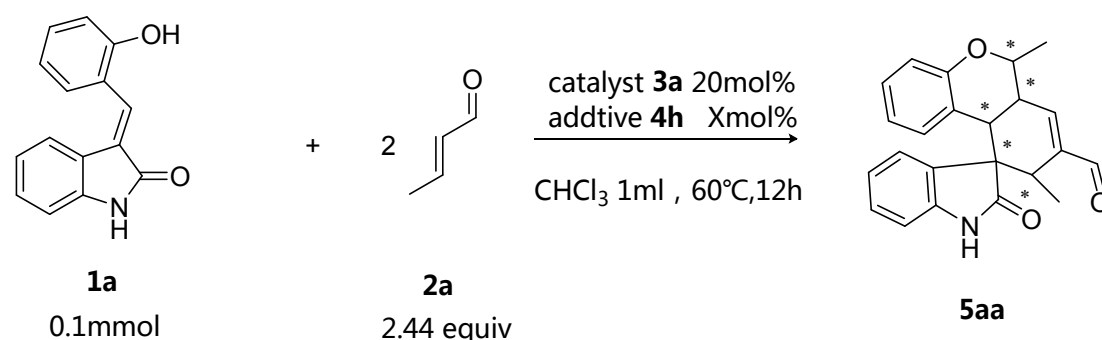

**Table S4. Investigation of the dosage of additive<sup>a</sup>**

| Entry | Additive dosage | Yield (%) <sup>b</sup> | Dr <sup>c</sup> | Ee (%) <sup>d</sup> |
|-------|-----------------|------------------------|-----------------|---------------------|
| 1     | 20 mol %        | 68                     | 2:1             | >99; 94             |
| 2     | 40 mol %        | 71                     | 2:1             | >99; 87             |
| 3     | 60 mol %        | 83                     | 3:1             | 99; 85              |
| 4     | 80 mol %        | 81                     | 2.4:1           | 97; 80              |
| 5     | 100 mol %       | 83                     | 2.3:1           | 95; 75              |
| 6     | 200 mol %       | 67                     | 1.5:1           | 96; 78              |

<sup>a</sup> Reactions were performed with 0.1 mmol **1a** and 0.244 mmol (20 μL) **2a** in the presence of the catalyst **3a** (20 mol %) and the additive **4h** (X mol %) in CHCl<sub>3</sub> at 60 °C for 12 h.

<sup>b</sup> The values are yields of isolated product after silica gel column chromatography.

<sup>c</sup> Determined by <sup>1</sup>H NMR on the crude reaction mixture.

<sup>d</sup> Determined by chiral HPLC.

## 5. Reaction time and temperature optimization<sup>a</sup>

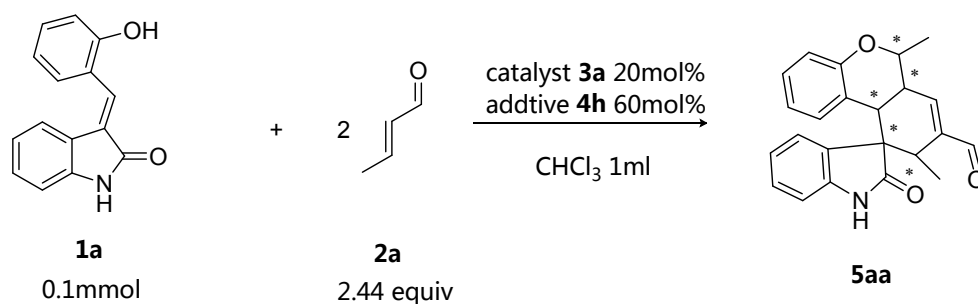

**Table S5. Reaction time and temperature optimization<sup>a</sup>**

| Entry          | Temperature (°C) | Time (h) | Yield (%) <sup>b</sup> | Dr <sup>c</sup> | Ee(%) <sup>d</sup> |
|----------------|------------------|----------|------------------------|-----------------|--------------------|
| 1              | 60               | 12       | 83                     | 3:1             | 99; 85             |
| 2              | 40               | 60       | 72                     | 6:1             | 97; n.d.           |
| 3              | 25               | 168      | 67                     | 5:1             | >99; n.d.          |
| 4 <sup>e</sup> | 40→60            | 36       | 80                     | 8:1             | >99; n.d.          |

<sup>a</sup> Reactions were performed with 0.1 mmol **1a** and 0.244 mmol (20  $\mu$ L) **2a** in the presence of the catalyst **3a** (20 mol %) and the additive **4h** (60 mol %) in  $\text{CHCl}_3$ .

<sup>b</sup> The values are yields of isolated product after silica gel column chromatography.

<sup>c</sup> Determined by  $^1\text{H}$  NMR on the crude reaction mixture.

<sup>d</sup> Determined by chiral HPLC.

<sup>e</sup> The reaction was conducted at 40 °C for 24 h , then heated up to 60 °C for 12 h.

The optimal conditions: in the presence of the catalyst **3a** (20 mol %) and the additive **4h** (60 mol%), 0.1 mmol **1a** and 0.244 mmol **2a** was stirred in  $\text{CHCl}_3$  1mL at 40 °C for 24h and then heated up to 60 °C for 12 h.

## (D) Tables for the Investigation of Substrate Scope<sup>a</sup>

**Table S6. The investigation of substrate scope**

| Entry | 1 | 2 | 5 | Yield (%) <sup>b</sup> | Dr <sup>c</sup> | Ee (%) <sup>d</sup> |
|-------|---|---|---|------------------------|-----------------|---------------------|
|       |   |   |   |                        |                 |                     |

|   |                                                                                                      |                                                                                                      |                                                                                                       |    |     |     |
|---|------------------------------------------------------------------------------------------------------|------------------------------------------------------------------------------------------------------|-------------------------------------------------------------------------------------------------------|----|-----|-----|
| 1 | 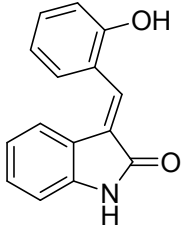 <p><b>1a</b></p>   |  <p><b>2a</b></p>   |  <p><b>5aa</b></p>   | 80 | 8:1 | >99 |
| 2 |  <p><b>1b</b></p>   |  <p><b>2a</b></p>   |  <p><b>5ba</b></p>   | 75 | 6:1 | >99 |
| 3 |  <p><b>1c</b></p>  |  <p><b>2a</b></p>  |  <p><b>5ca</b></p>  | 65 | 5:1 | >99 |
| 4 |  <p><b>1d</b></p> |  <p><b>2a</b></p> |  <p><b>5da</b></p> | 72 | 7:1 | 98  |
| 5 |  <p><b>1e</b></p> |  <p><b>2a</b></p> |  <p><b>5ea</b></p> | 65 | 6:1 | 98  |



|    |                                                                                                      |                                                                                                      |                                                                                                       |    |     |     |
|----|------------------------------------------------------------------------------------------------------|------------------------------------------------------------------------------------------------------|-------------------------------------------------------------------------------------------------------|----|-----|-----|
| 6  | 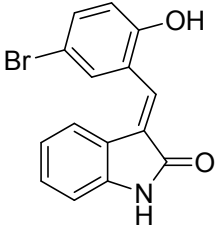 <p><b>1f</b></p>   |  <p><b>2a</b></p>   |  <p><b>5fa</b></p>   | 70 | 7:1 | 98  |
| 7  |  <p><b>1g</b></p>   |  <p><b>2a</b></p>   |  <p><b>5ga</b></p>   | 35 | 4:1 | 98  |
| 8  |  <p><b>1h</b></p>  |  <p><b>2a</b></p>  |  <p><b>5ha</b></p>  | 75 | 5:1 | >99 |
| 9  |  <p><b>1i</b></p> |  <p><b>2a</b></p> |  <p><b>5ib</b></p> | 65 | 1:4 | >99 |
| 10 |  <p><b>1j</b></p> |  <p><b>2a</b></p> |  <p><b>5ja</b></p> | 67 | 6:1 | 98  |
| 11 |  <p><b>1k</b></p> |  <p><b>2a</b></p> |  <p><b>5ka</b></p> | 80 | 6:1 | 96  |

|    |                                                                                                      |                                                                                                      |                                                                                                       |    |       |     |
|----|------------------------------------------------------------------------------------------------------|------------------------------------------------------------------------------------------------------|-------------------------------------------------------------------------------------------------------|----|-------|-----|
| 12 | 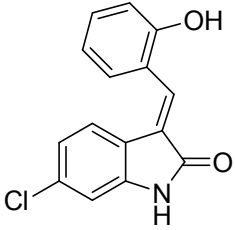 <p><b>1l</b></p>   |  <p><b>2a</b></p>   |  <p><b>5la</b></p>   | 90 | 7:1   | >99 |
| 13 |  <p><b>1m</b></p>   |  <p><b>2a</b></p>   |  <p><b>5ma</b></p>   | 31 | 10:1  | 94  |
| 14 |  <p><b>1n</b></p>  |  <p><b>2a</b></p>  |  <p><b>5na</b></p>  | 45 | 12:1  | 92  |
| 15 |  <p><b>1o</b></p> |  <p><b>2a</b></p> |  <p><b>5oa</b></p> | 83 | 2.5:1 | >99 |
| 16 |  <p><b>1a</b></p> |  <p><b>2b</b></p> |  <p><b>5pa</b></p> | 55 | 1:2.5 | 64  |

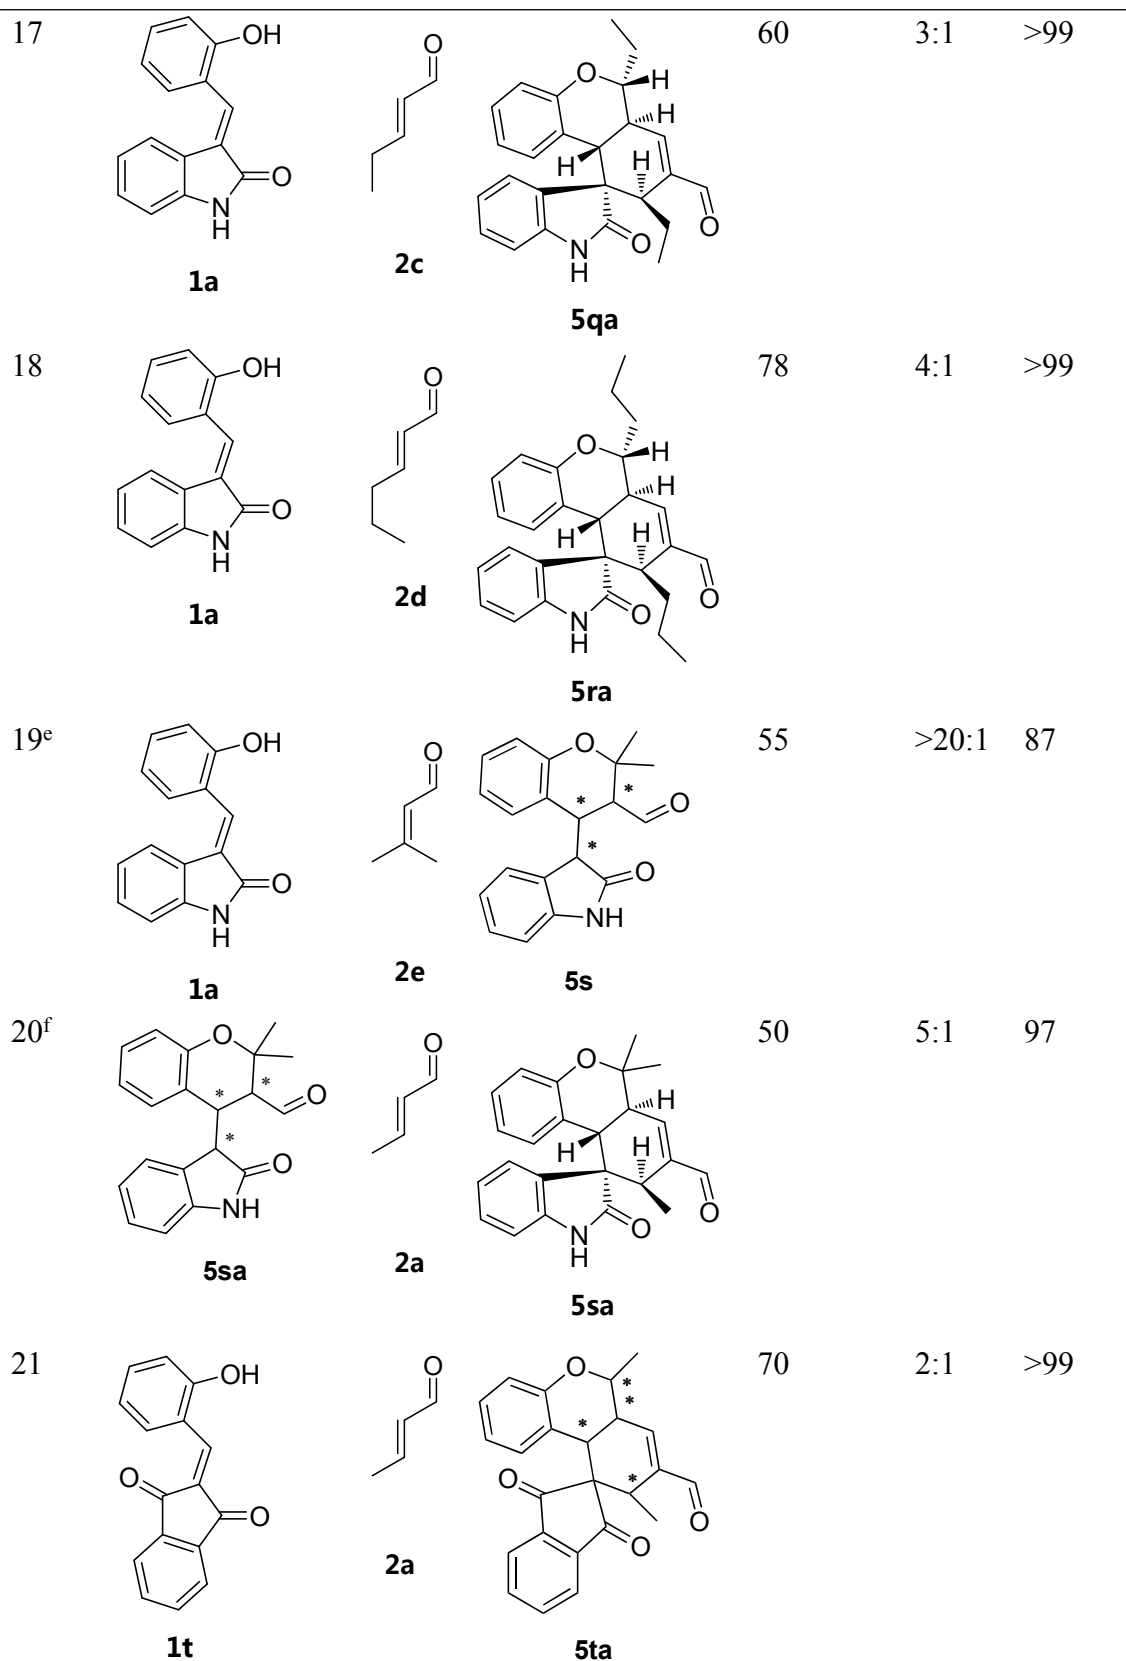

<sup>a</sup> Reactions were performed with 0.1 mmol **1** and 0.244 mmol **2** in the presence of the catalyst **3a** (20 mol %) and the additive **4h** (60 mol %) in CHCl<sub>3</sub> 1 mL at 40 °C for 24 h and then heated up to 60 °C for 12 h.

<sup>b</sup> The values are yields of isolated product after silica gel column chromatography.

<sup>c</sup> Determined by <sup>1</sup>H NMR on the crude reaction mixture.

<sup>d</sup> Determined by chiral HPLC.

<sup>e</sup> only one molecule of **2e** was involved in the reaction at 40 °C for 24h to generate **5sa**.

<sup>f</sup> only one molecule of **2a** was employed in the reaction at 60 °C for 12h to generate **5s**.

### **(E) Synthesis of several Substituted Oxindole.**

Substituted Isatin (10 mmol) was dissolved in hydrazine hydrate (98%, 10 mL, 32.5 mmol) and refluxed for 15-30 min (130 °C). The reaction mixture was then poured in cold water, extracted with EtOAc and the organic layer was dried over Na<sub>2</sub>SO<sub>4</sub>. Evaporation of the solvent and recrystallization from hexane/ethyl acetate afforded substituted oxindole.

### **(F) Synthesis of Substituted (*E*)-3-(2-hydroxybenzylidene)Oxindole.**

A reaction mixture of substituted oxindole (1 equiv), substituted salicylaldehyde (1.2 equiv) and piperidine (0.1 equiv) in ethanol (1-2 mL/1 mmol) was stirred at 90 °C for 3-5 h. After cooled down, the precipitate was filtered and washed with cold ethanol and diethyl ether, successively. Allowed to dry, it was used in subsequent reaction without further purification.

### **(G) Biological Activity study**

#### **Anti-tumor assay**

Briefly, targeted cancer cells lines (3×10<sup>3</sup>/well) were seeded in 96-well plates and cultured for 24 h, followed by compounds treatment for 24 h. A volume of 20 μL of 5 mg/mL MTT was added per well and incubated for another 4 h at 37 °C, then the supernatant fluid was removed and DMSO was added 150 μL /well for 15-20 min. The absorptions (OD) were measured at 570 nm with Spectra MAX M5 microplate spectrophotometer (Molecular Devices). The effect of compounds on tumor cells viability was expressed by cell growth inhibitory rate at 30 μM or IC<sub>50</sub> of each cell line. Each assay was carried out at least three times. The results are summarized in **Table S7** and **Table S8**.

**Table S7. Cellular evaluation of the polycyclic spiro-fused carbocyclicoxindoles **5** against cancer cell-line MCF-7 (cell growth inhibitory rate at 30 μM)<sup>a</sup>**

| Entry | Compound | Inhibition rate of anticancer cells proliferation (%) |
|-------|----------|-------------------------------------------------------|
| 1     | 5aa      | 35.78                                                 |
| 2     | 5ba      | 29.19                                                 |

|          |            |              |
|----------|------------|--------------|
| 3        | 5ca        | 36.31        |
| 4        | 5da        | 48.72        |
| 5        | 5ea        | 39.11        |
| 6        | 5fa        | 68.25        |
| 7        | 5ga        | 44.55        |
| 8        | 5ha        | 45.64        |
| <b>9</b> | <b>5ia</b> | <b>99.95</b> |
| 10       | 5ja        | 41.57        |
| 11       | 5ka        | 13.45        |
| 12       | 5la        | 83.29        |
| 13       | 5ma        | 41.78        |
| 14       | 5na        | 89.02        |
| 15       | 5oa        | 19.68        |
| 16       | 5pa        | 64.98        |
| 17       | 5qa        | 34.20        |
| 18       | 5ra        | 81.72        |
| 19       | 5sa        | 31.97        |

<sup>a</sup> Inhibition rate values were measured by an MTT assay upon 24 h drug treatment. Values were obtained through independent measurement of cell viabilities.

**Table S8. Cellular evaluation of the the polycyclic spiro-fused carbocyclooxindole 5ia against diverse cancer cell-lines (IC<sub>50</sub> in  $\mu$ M)<sup>a</sup>**

| Entry | Cell lines | IC <sub>50</sub> ( $\mu$ M) |
|-------|------------|-----------------------------|
| 1     | MCF-7      | 9.2                         |
| 2     | MDA-MB-231 | 11.5                        |
| 3     | H1975      | 14.1                        |
| 4     | FaDu       | 13.7                        |

<sup>a</sup> Values were average of three determinations and deviation from the average is <5% of the average value

#### **(H) Analytical and Spectral Characterization Data**

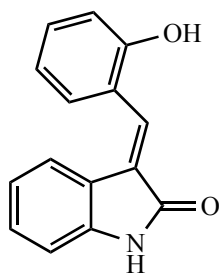

1a

$^1\text{H}$  NMR (400 MHz, DMSO)  $\delta$  = 10.57 (s, 1H), 10.19 (s, 1H), 7.69 (s, 1H), 7.64-7.63 (m, 1H), 7.51-7.49 (m, 1H), 7.34-7.30 (m, 1H), 7.23-7.19 (m, 1H), 6.99-6.95 (m, 1H), 6.93-6.91 (m, 1H), 6.88-6.83 (m, 2H).  $^{13}\text{C}$  NMR (100 MHz, DMSO)  $\delta$  = 168.8, 156.5, 142.6, 132.4, 131.6, 129.6, 129.5, 126.4, 122.3, 121.3, 121.2, 121.0, 118.8, 115.9, 109.9.

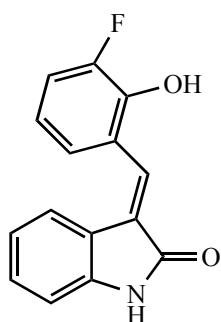

1b

$^1\text{H}$  NMR (400 MHz, DMSO)  $\delta$  = 10.61 (s, 1H), 10.28 (s, 1H), 7.65 (s, 1H), 7.45-7.42 (m, 2H), 7.32-7.21 (m, 2H), 6.97-6.83 (m, 3H).  $^{13}\text{C}$  NMR (100 MHz, DMSO)  $\delta$  = 168.5, 151.7 (d,  $J$  = 238 Hz), 143.7 (d,  $J$  = 15 Hz), 142.8, 130.8 (d,  $J$  = 3 Hz), 130.0, 127.7, 124.9 (d,  $J$  = 3 Hz), 124.7 (d,  $J$  = 3 Hz), 122.5, 121.0, 120.9, 119.1 (d,  $J$  = 7 Hz), 117.2 (d,  $J$  = 19 Hz), 110.0.

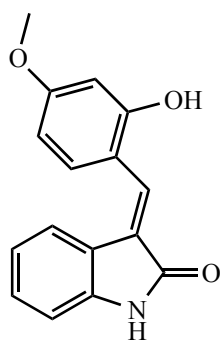

1c

$^1\text{H}$  NMR (400 MHz, DMSO)  $\delta$  = 10.50 (s, 1H), 10.35 (s, 1H), 7.68 (s, 1H), 7.65-7.58 (m, 2H), 7.19-7.17 (m, 1H), 6.88-6.85 (m, 2H), 6.58-6.52 (m, 2H), 3.79 (s, 3H).  $^{13}\text{C}$  NMR (100 MHz, DMSO)  $\delta$  = 169.1, 162.3, 158.4, 142.2, 132.4, 130.6, 129.1, 124.2, 121.9, 121.5, 120.9, 114.1, 109.8, 105.2, 101.1, 55.2.

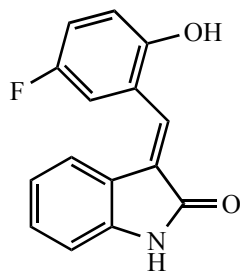

1d

$^1\text{H}$  NMR (400 MHz, DMSO)  $\delta$  = 10.61 (s, 1H), 10.21 (s, 1H), 7.59 (s, 1H), 7.45-7.28 (m, 2H), 7.25-7.14 (m, 2H), 6.99-6.96 (m, 1H), 6.90-6.87 (m, 2H).  $^{13}\text{C}$  NMR (100 MHz, DMSO)  $\delta$  = 168.6, 154.7(d,  $J$  = 238 Hz), 152.7 (d,  $J$  = 1.2 Hz), 142.8, 130.9, 130.0, 127.6, 122.5, 122.1 (d,  $J$  = 8 Hz), 121.1, 120.9, 117.8 (d,  $J$  = 23 Hz), 117.0 (d,  $J$  = 8 Hz), 115.2 (d,  $J$  = 23 Hz), 110.0.

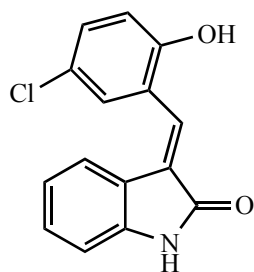

1e

$^1\text{H}$  NMR (400 MHz, DMSO)  $\delta$  = 10.61 (s, 1H), 10.49 (s, 1H), 7.60-7.56 (m, 2H), 7.39-7.34 (m, 2H), 7.25-7.21 (m, 1H), 7.00-6.98 (m, 1H), 6.90-6.87 (m, 2H).  $^{13}\text{C}$  NMR (100 MHz, DMSO)  $\delta$  = 168.5, 155.2, 142.9, 130.8, 130.6, 130.1, 128.6, 127.7, 123.1, 122.3, 122.2, 121.1, 120.9, 117.6, 110.1.

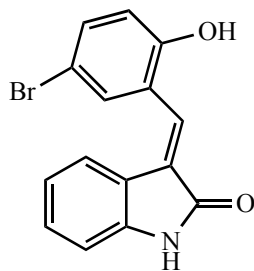

1f

$^1\text{H}$  NMR (400 MHz, DMSO)  $\delta$  = 10.61 (s, 1H), 10.53 (s, 1H), 7.73-7.72 (m, 1H), 7.56 (s, 1H), 7.49-7.46 (m, 1H), 7.39-7.37 (m, 1H), 7.25-7.21 (m, 1H), 6.96-6.87 (m, 3H).  $^{13}\text{C}$  NMR (100 MHz, DMSO)  $\delta$  = 168.4, 155.6, 142.9, 133.6, 131.4, 130.5, 130.1, 127.7, 123.7, 122.2, 122.5, 121.1, 120.9, 118.1, 110.1, 109.6.

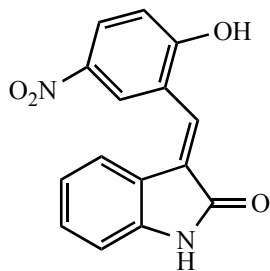

1g

$^1\text{H}$  NMR (400 MHz, DMSO)  $\delta$  = 10.67 (s, 1H), 8.51-8.50 (m, 1H), 8.24-8.21 (m, 1H), 7.58 (s, 1H), 7.44-7.42 (m, 1H), 7.27-7.23 (m, 1H), 7.16-7.14 (m, 1H), 6.91-6.84 (m, 2H).  $^{13}\text{C}$  NMR (100 MHz, DMSO)  $\delta$  = 168.3, 162.4, 143.1, 139.2, 130.4, 129.4, 128.6, 127.0, 125.5, 122.5, 121.8, 121.3, 120.6, 116.3, 110.2

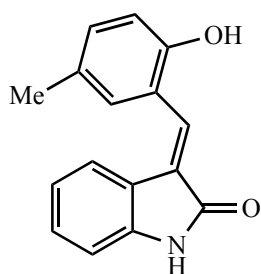

1h

$^1\text{H}$  NMR (400 MHz, DMSO)  $\delta$  = 10.55 (s, 1H), 9.94 (s, 1H), 7.67 (s, 1H), 7.52-7.51 (m, 1H), 7.43 (s, 1H), 7.23-7.19 (m, 1H), 7.14-7.11 (m, 1H), 6.89-6.84 (m, 3H).  $^{13}\text{C}$  NMR (100 MHz, DMSO)  $\delta$  = 168.8, 154.2, 142.5, 132.6, 132.1, 129.6, 129.5, 127.3, 126.3, 122.2, 121.3, 121.0, 115.8, 109.9, 20.0.

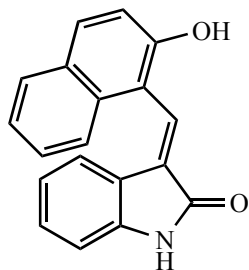

1i

$^1\text{H}$  NMR (400 MHz, DMSO)  $\delta$  = 10.61 (s, 1H), 10.34 (s, 1H), 7.93-7.89 (m, 2H), 7.85 (s, 1H), 7.59-7.57 (m, 1H), 7.43-7.37 (m, 1H), 7.35-7.30 (m, 2H), 7.15-7.11 (m, 1H), 6.86-6.84 (m, 1H), 6.66-6.62 (m, 1H), 6.39-6.37 (m, 1H).  $^{13}\text{C}$  NMR (100 MHz, DMSO)  $\delta$  = 168.4, 153.7, 142.5, 131.4, 131.0, 129.6, 129.5, 129.3, 128.6, 127.6, 127.1, 124.1, 123.7, 123.2, 121.7, 120.8, 118.1, 113.7, 109.5.



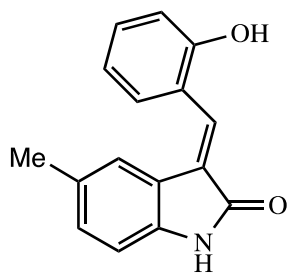

1j

$^1\text{H NMR}$  (400 MHz, DMSO)  $\delta$  = 10.46 (s, 1H), 10.17 (s, 1H),

7.66 (s, 1H), 7.64-7.62 (m, 1H), 7.34-7.30 (m, 2H), 7.04-6.92 (m, 3H), 6.77-6.75 (m, 1H), 2.16 (s, 3H).  $^{13}\text{C NMR}$  (100 MHz, DMSO)  $\delta$  = 168.8, 156.5, 140.3, 132.2, 131.6, 130.1, 129.5, 126.6, 122.8, 121.4, 121.3, 118.7, 115.9, 109.6, 20.8.

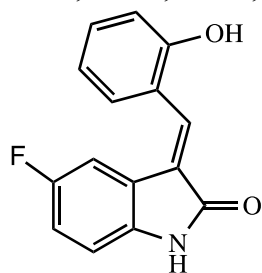

1k

$^1\text{H NMR}$  (400 MHz, DMSO)  $\delta$  = 10.60 (s, 1H), 10.29 (s, 1H),

7.76 (s, 1H), 7.61-7.59 (m, 1H), 7.37-7.33 (m, 1H), 7.19-7.17 (m, 1H), 7.09-7.04 (m, 1H), 7.02-6.94 (m, 2H), 6.88-6.84 (m, 1H).  $^{13}\text{C NMR}$  (100 MHz, DMSO)  $\delta$  = 168.7, 157.1 (d,  $J$  = 235 Hz), 156.5, 138.9, 134.1, 132.0, 129.5, 126.3 (d,  $J$  = 3 Hz), 122.3 (d,  $J$  = 9 Hz), 120.9, 118.9, 116.1, 115.8 (d,  $J$  = 24 Hz), 110.5 (d,  $J$  = 8 Hz), 109.4 (d,  $J$  = 26 Hz).

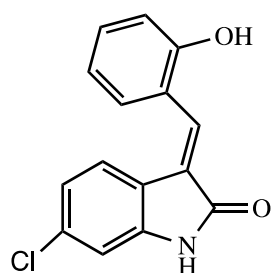

1l

$^1\text{H NMR}$  (400 MHz, DMSO)  $\delta$  = 10.73 (s, 1H), 10.27 (s, 1H),

7.74 (s, 1H), 7.61-7.59 (m, 1H), 7.48-7.46 (m, 1H), 7.35-7.31 (m, 1H), 7.00-6.98 (m, 1H), 6.94-6.88 (m, 3H).  $^{13}\text{C NMR}$  (100 MHz, DMSO)  $\delta$  = 168.7, 156.6, 143.9, 133.6, 133.3, 131.9, 129.5, 125.3, 123.5, 121.0, 120.8, 120.2, 118.9, 116.0, 109.9.

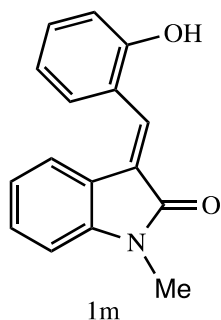

$^1\text{H}$  NMR (400 MHz, DMSO)  $\delta$  = 10.23 (s, 1H), 7.78 (s, 1H), 7.64-7.62 (m, 1H), 7.55-7.53 (m, 1H), 7.35-7.29 (m, 2H), 7.04-6.98 (m, 2H), 6.95-6.91 (m, 2H), 3.21 (s, 3H).  $^{13}\text{C}$  NMR (100 MHz, DMSO)  $\delta$  = 167.3, 156.5, 143.7, 133.0, 131.7, 129.7, 129.6, 125.5, 122.0, 121.5, 121.2, 120.5, 118.8, 116.0, 108.7, 25.9.

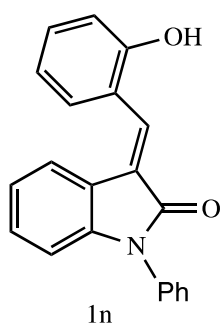

$^1\text{H}$  NMR (400 MHz, DMSO)  $\delta$  = 10.30 (s, 1H), 7.88 (s, 1H), 7.71-7.69 (m, 1H), 7.65-7.58 (m, 3H), 7.50-7.47 (m, 3H), 7.38-7.35 (m, 1H), 7.28-7.24 (m, 1H), 7.03-6.95 (m, 3H), 6.79-6.77 (m, 1H).  $^{13}\text{C}$  NMR (100 MHz, DMSO)  $\delta$  = 166.8, 156.6, 143.3, 134.3, 134.1, 131.9, 129.7, 129.6, 128.0, 126.9, 125.1, 122.4, 122.2, 121.1, 120.7, 118.9, 116.1, 109.1.

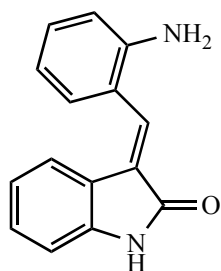

$^1\text{H}$  NMR (400 MHz, DMSO)  $\delta$  = 10.51 (s, 1H), 7.57 (s, 1H), 7.48-7.42 (m, 2H), 7.21-7.14 (m, 2H), 6.87-6.77 (m, 3H), 6.65-6.61 (m, 1H), 5.52 (s, 2H).  $^{13}\text{C}$  NMR (100 MHz, DMSO)  $\delta$  = 168.9, 147.9, 142.3, 133.2, 131.1, 129.3, 129.2, 126.0, 122.3, 121.6, 120.8, 117.9, 115.6, 115.5, 109.7.

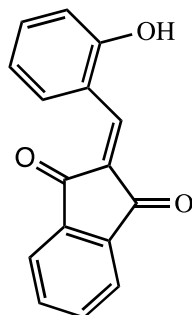

1t  $^1\text{H}$  NMR (400 MHz, DMSO)  $\delta$  = 10.89 (s, 1H), 8.91-8.89 (m, 1H), 8.33 (s, 1H), 7.96-7.95 (m, 4H), 7.49-7.45 (m, 1H), 7.02-6.94 (m, 2H).  $^{13}\text{C}$  NMR (100 MHz, DMSO)  $\delta$  = 189.9, 188.8, 160.0, 141.8, 139.8, 139.3, 136.0, 135.8, 135.6, 133.1, 127.1, 122.9, 122.8, 119.9, 119.0, 116.0.

**6,9-dimethyl-2'-oxo-6,6a,9,10a-tetrahydrospiro[benzo[c]chromene-10,3'-indoline]-8-carbaldehyde (5aa)**

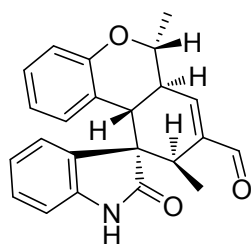

5aa light yellow solid; 80% yield; >99% ee; 8 : 1 dr; m.p. 125 °C - 127 °C;  $[\alpha]_{\text{D}}^{22}$  = -49.8 (c = 1.53 in  $\text{CHCl}_3$ ); HPLC (DAICEL CORPORATION AS-H), 2-propanol/n-hexane = 10/90, flow rate = 1.0 mL/min,  $\lambda$  = 254 nm, retention time: 13.69 min (major) and 17.80 min (minor);  $^1\text{H}$  NMR (400 MHz,  $\text{CDCl}_3$ )  $\delta$  = 9.53 (s, 1H), 8.86 (s, 1H), 7.28 (s, 1H), 7.13 (d,  $J$  = 7.2 Hz, 1H), 6.98 (t,  $J$  = 7.2 Hz, 2H), 6.90 (d,  $J$  = 7.6 Hz, 1H), 6.86-6.73 (m, 2H), 6.41 (t,  $J$  = 7.6 Hz, 1H), 5.99 (d,  $J$  = 7.6 Hz, 1H), 4.40 (dq,  $J$  = 11.6, 6.0 Hz, 1H), 3.67 (d,  $J$  = 10.4 Hz, 1H), 3.21 (t,  $J$  = 10.4 Hz, 1H), 2.81 (q,  $J$  = 6.4 Hz, 1H), 1.60 (d,  $J$  = 6.0 Hz, 3H), 1.19 (d,  $J$  = 6.8 Hz, 3H).  $^{13}\text{C}$  NMR (100 MHz,  $\text{CDCl}_3$ )  $\delta$  = 193.0, 179.1, 154.6, 147.0, 143.7, 140.0, 131.0, 128.6, 127.9, 126.0, 125.8, 124.2, 122.1, 120.4, 117.2, 110.2, 77.7, 50.6, 44.0, 36.5, 34.8, 20.8, 18.9. HRMS (ESI-TOF) calcd for  $\text{C}_{23}\text{H}_{21}\text{NO}_3$   $[\text{M}+\text{Na}]^+$  = 382.1414, Found 382.1415.

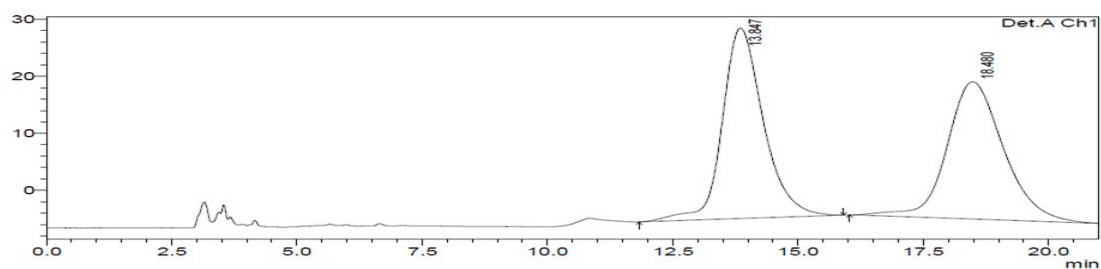

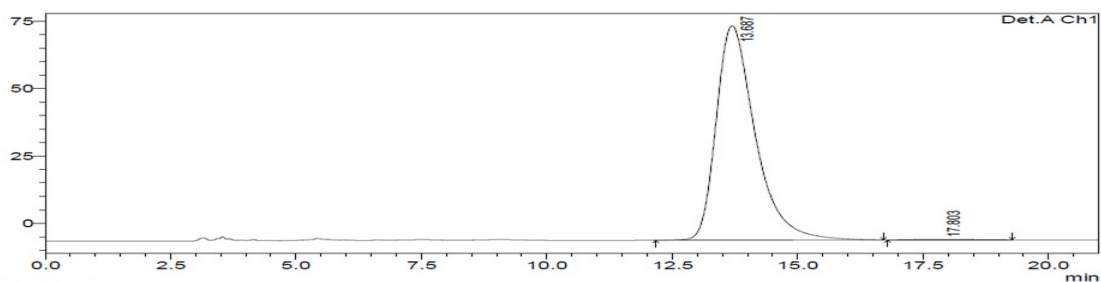

**4-fluoro-6,9-dimethyl-2'-oxo-6,6a,9,10a-tetrahydrospiro[benzo[*c*]chromene-10,3'-indoline]-8-carbaldehyde (5ba)**

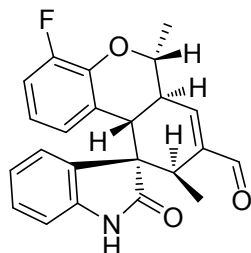

**5ba**

White solid; 75% yield; >99% ee; 6:1 dr; m.p. 59 °C-61 °C;  $[\alpha]_D^{22} = -50.0$  ( $c = 0.074$  in  $\text{CHCl}_3$ ); HPLC (DAICEL CORPORATION AS-H), 2-propanol/*n*-hexane = 15/85, flow rate = 1.0 mL/min,  $\lambda = 254$  nm, retention time: 11.99 min (major) and 14.07 min (minor);  $^1\text{H}$  NMR (400 MHz,  $\text{CDCl}_3$ )  $\delta = 9.54$  (s, 1H), 7.95 (s, 1H), 7.32 (t,  $J = 7.6$  Hz, 1H), 7.17 (d,  $J = 7.6$  Hz, 1H), 7.07-6.94 (m, 2H), 6.88-6.77 (m, 2H), 6.37 (td,  $J = 8.0, 5.2$  Hz, 1H), 5.79 (d,  $J = 8.0$  Hz, 1H), 4.48 (dq,  $J = 12.0, 6.0$  Hz, 1H), 3.69 (d,  $J = 10.4$  Hz, 1H), 3.24 (t,  $J = 10.8$  Hz, 1H), 2.84 (q,  $J = 6.8$  Hz, 1H), 1.68 (d,  $J = 6.0$  Hz, 3H), 1.21 (d,  $J = 7.2$  Hz, 3H).  $^{13}\text{C}$  NMR (100 MHz,  $\text{CDCl}_3$ )  $\delta = 192.9, 179.3, 146.3, 143.8, 142.7, 140.0, 130.8, 128.7, 128.3, 125.9, 122.2, 119.9, 119.3, 114.8, 114.6, 110.4, 78.3, 50.7, 43.9, 36.5, 34.8, 20.7, 18.9$ . HRMS (ESI-TOF) calcd for  $\text{C}_{23}\text{H}_{20}\text{FNO}_3$   $[\text{M}+\text{Na}]^+ = 400.1319$ , Found 400.1325.

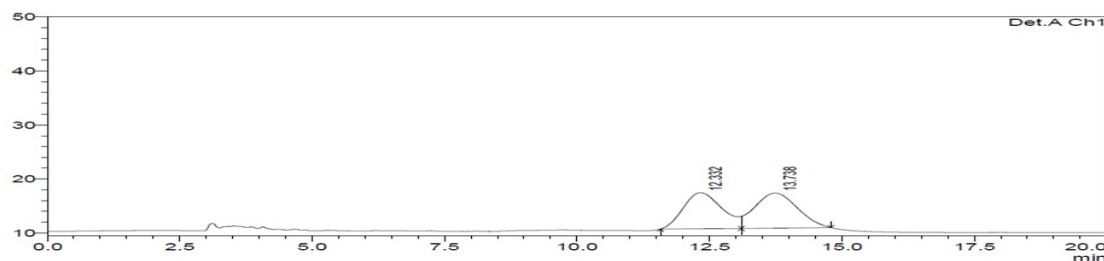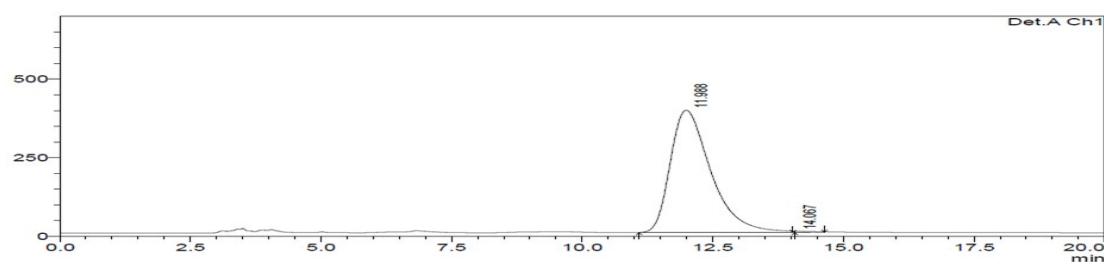

**3-methoxy-6,9-dimethyl-2'-oxo-6,6a,9,10a-tetrahydrospiro[benzo[c]chromene-10,3'-indoline]-8-carbaldehyde (5ca)**

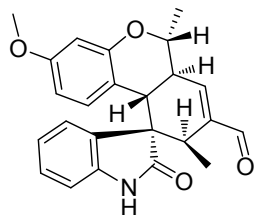

**5ca** light yellow solid; 65% yield; >99% ee; 5:1 dr; m.p.70 °C-72 °C;

$[\alpha]_D^{22} = -42.3$  ( $c = 0.40$  in  $\text{CHCl}_3$ ); HPLC (DAICEL CORPORATION AS-H), 2-propanol/*n*-hexane = 10/90, flow rate = 1.0 mL/min,  $\lambda = 254$  nm, retention time: 17.63 min (major) and 21.38 min (minor);  $^1\text{H NMR}$  (400 MHz,  $\text{CDCl}_3$ )  $\delta = 9.53$  (s, 1H), 7.31 (t,  $J = 7.6$  Hz, 1H), 7.19 (d,  $J = 7.6$  Hz, 1H), 7.03 (t,  $J = 7.6$  Hz, 1H), 6.96 (d,  $J = 7.6$  Hz, 1H), 6.83 (d,  $J = 2.4$  Hz, 1H), 6.38 (d,  $J = 2.4$  Hz, 1H), 6.00 (dd,  $J = 8.8, 2.4$  Hz, 1H), 5.88 (d,  $J = 8.8$  Hz, 1H), 4.38 (dq,  $J = 12.2, 6.0$  Hz, 1H), 3.65 (s, 4H), 3.23 (t,  $J = 10.4$  Hz, 1H), 2.81 (q,  $J = 6.8$  Hz, 1H), 1.62 (d,  $J = 6.0$  Hz, 3H), 1.19 (d,  $J = 4.8$  Hz, 3H).  $^{13}\text{C NMR}$  (100 MHz,  $\text{CDCl}_3$ )  $\delta = 193.0, 179.4, 159.5, 155.7, 146.9, 143.9, 140.1, 131.1, 128.6, 126.0, 124.9, 122.1, 117.5, 110.3, 106.0, 102.8, 77.6, 55.2, 50.9, 44.0, 36.1, 34.7, 20.7, 19.0$ . HRMS (ESI-TOF) calcd for  $\text{C}_{24}\text{H}_{23}\text{NO}_4$   $[\text{M}+\text{Na}]^+ = 412.1519$ , Found 412.1533.

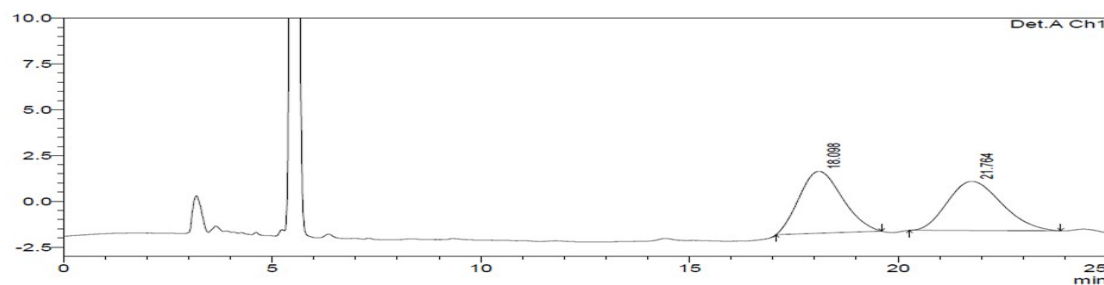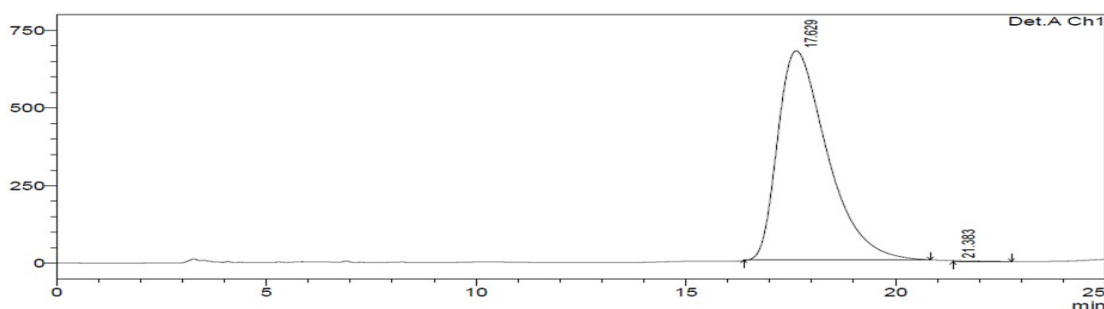

**2-fluoro-6,9-dimethyl-2'-oxo-6,6a,9,10a-tetrahydrospiro[benzo[c]chromene-10,3'-indoline]-8-carbaldehyde (5da)**

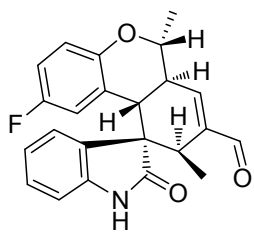

**5da**

White solid; 72% yield; 98% ee; 7:1 dr; m.p. 61 °C-63 °C;  $[\alpha]_D^{22} = -24.5$  ( $c = 0.33$  in  $\text{CHCl}_3$ ); HPLC (DAICEL CORPORATION AS-H), 2-propanol/*n*-hexane = 10/90, flow rate = 1.0 mL/min,  $\lambda = 254$  nm, retention time: 15.51 min (major) and 18.96 min (minor);  $^1\text{H}$  NMR (400 MHz,  $\text{CDCl}_3$ )  $\delta = 9.53$  (s, 1H), 8.00 (s, 1H), 7.34 (t,  $J = 7.6$  Hz, 1H), 7.18 (d,  $J = 7.6$  Hz, 1H), 7.08-6.97 (m, 2H), 6.81 (d,  $J = 2.4$  Hz, 1H), 6.76-6.66 (m, 2H), 5.73 (dd,  $J = 10.0, 2.4$  Hz, 1H), 4.37 (dq,  $J = 12.0, 6.0$  Hz, 1H), 3.64 (d,  $J = 10.4$  Hz, 1H), 3.18 (t,  $J = 10.8$  Hz, 1H), 2.83 (q,  $J = 6.8$  Hz, 1H), 1.59 (d,  $J = 6.0$  Hz, 3H), 1.21 (d,  $J = 6.8$  Hz, 3H).  $^{13}\text{C}$  NMR (100 MHz,  $\text{CDCl}_3$ )  $\delta = 192.9, 179.2, 150.6, 146.6, 143.7, 140.1, 130.4, 129.0, 127.1, 127.1, 126.0, 122.3, 117.9, 117.8, 114.3, 114.1, 111.5, 111.3, 110.6, 77.5, 50.6, 43.8, 36.5, 34.8, 20.7, 18.8$ . HRMS (ESI-TOF) calcd for  $\text{C}_{23}\text{H}_{20}\text{FNO}_3$   $[\text{M}+\text{Na}]^+ = 400.1319$ , Found 400.1329.

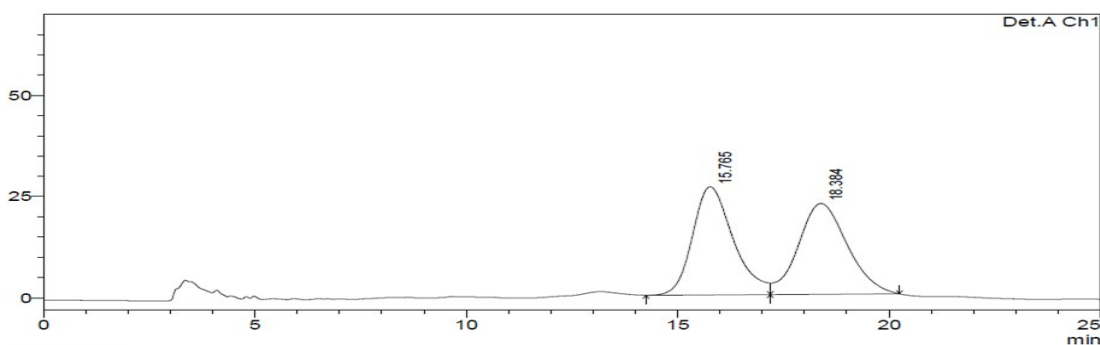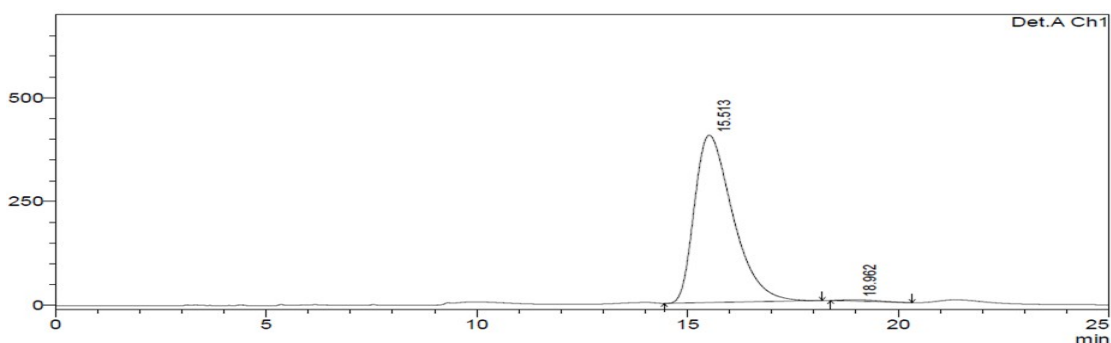

**2-chloro-6,9-dimethyl-2'-oxo-6,6a,9,10a-tetrahydrospiro[benzo[*c*]chromene-10,3'-indoline]-8-carbaldehyde (5ea)**

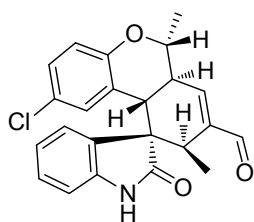

**5ea**

White solid; 65% yield; 98% ee; 6:1 dr; m.p. 54 °C-56 °C;  $[\alpha]_D^{22} = -61.3$  ( $c = 0.266$  in  $\text{CHCl}_3$ ); HPLC (DAICEL CORPORATION AS-H), 2-propanol/*n*-hexane = 5/95, flow rate = 1.0 mL/min,  $\lambda = 254$  nm, retention time: 31.17 min (major) and 39.05 min (minor);  $^1\text{H}$  NMR (400 MHz,  $\text{CDCl}_3$ )  $\delta = 9.53$  (s, 1H), 7.36 (t,  $J = 7.6$  Hz, 1H), 7.18 (d,  $J = 7.6$  Hz, 1H), 7.10-6.99 (m, 2H), 6.95 (dd,  $J = 8.4, 2.0$  Hz, 1H), 6.82 (d,  $J = 2.4$  Hz, 1H), 6.72 (d,  $J = 8.4$  Hz, 1H), 5.94 (d,  $J = 1.2$  Hz, 1H), 4.38 (dq,  $J = 12.0, 6.0$  Hz, 1H), 3.63 (d,  $J = 10.4$  Hz, 1H), 3.21 (t,  $J = 10.4$  Hz, 1H), 2.84 (q,  $J = 6.8$  Hz, 1H), 1.60 (d,  $J = 6.0$  Hz, 3H), 1.21 (d,  $J = 6.8$  Hz, 3H).  $^{13}\text{C}$  NMR (100 MHz,  $\text{CDCl}_3$ )  $\delta$  192.9, 178.8, 153.3, 146.3, 143.8, 140.1, 130.4, 129.0, 127.8, 126.9, 126.0, 125.0, 124.7, 122.3, 118.3, 110.4, 77.7, 50.5, 43.5, 36.5, 34.7, 20.6, 18.9. HRMS (ESI-TOF) calcd for  $\text{C}_{23}\text{H}_{20}\text{ClNO}_3$   $[\text{M}+\text{Na}]^+ = 416.1024$ , Found 416.1033.

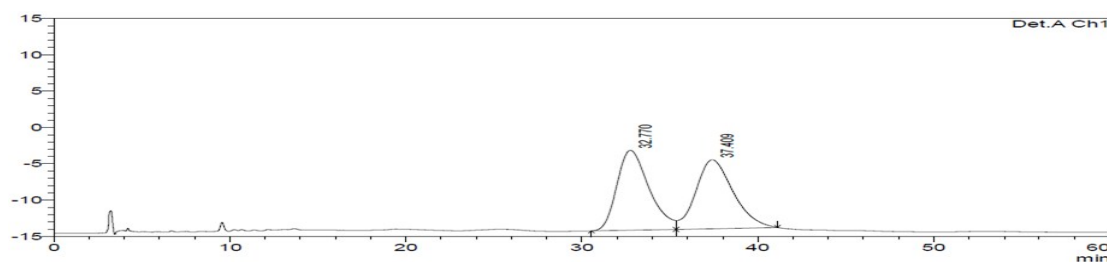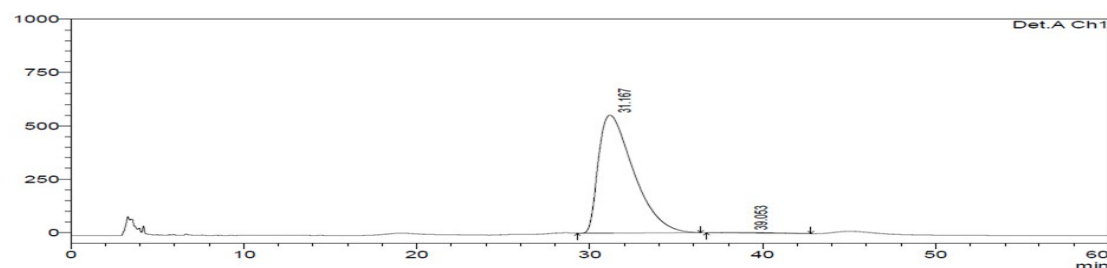

**2-bromo-6,9-dimethyl-2'-oxo-6,6a,9,10a-tetrahydrospiro[benzo[*c*]chromene-10,3'-indoline]-8-carbaldehyde (5fa)**

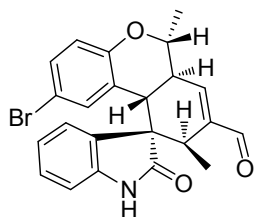

**5fa**

White solid; 70% yield; 98% ee; 7:1 dr; m.p. 94 °C-96 °C;  $[\alpha]_D^{22} = -72.6$  ( $c = 1.15$  in  $\text{CHCl}_3$ ); HPLC (DAICEL CORPORATION AS-H), 2-propanol/*n*-hexane = 5/95, flow rate = 1.0 mL/min,  $\lambda = 254$  nm, retention time: 32.81 min (major) and 37.87 min (minor);  $^1\text{H}$  NMR (400 MHz,  $\text{CDCl}_3$ )  $\delta = 9.54$  (s, 1H),

7.70 (s, 1H), 7.37 (t,  $J = 7.6$  Hz, 1H), 7.19 (d,  $J = 7.6$  Hz, 1H), 7.12-7.00 (m, 3H), 6.82 (d,  $J = 2.4$  Hz, 1H), 6.67 (d,  $J = 8.8$  Hz, 1H), 6.08 (d,  $J = 1.2$  Hz, 1H), 4.38 (dq,  $J = 12.0, 6.0$  Hz, 1H), 3.64 (d,  $J = 10.4$  Hz, 1H), 3.21 (t,  $J = 11.2$  Hz, 1H), 2.85 (q,  $J = 6.8$  Hz, 1H), 1.61 (d,  $J = 6.0$  Hz, 3H), 1.22 (d,  $J = 7.2$  Hz, 3H).  $^{13}\text{C}$  NMR (100 MHz,  $\text{CDCl}_3$ )  $\delta = 192.9, 178.9, 153.8, 146.3, 143.8, 140.0, 130.7, 130.4, 129.0, 127.7, 127.3, 126.0, 122.4, 118.7, 112.4, 110.4, 77.7, 50.6, 43.4, 36.5, 34.6, 20.6, 18.9$ . HRMS (ESI-TOF) calcd for  $\text{C}_{23}\text{H}_{20}\text{BrNO}_3$   $[\text{M}+\text{Na}]^+ = 460.0519$ , Found 460.0525.

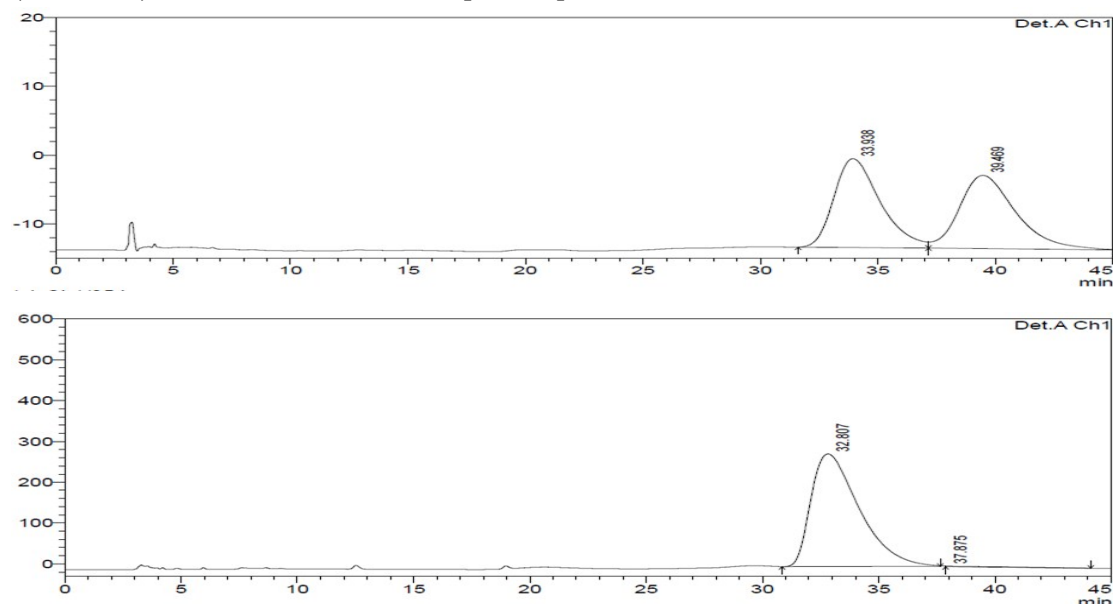

**6,9-dimethyl-2-nitro-2'-oxo-6,6a,9,10a-tetrahydrospiro[benzo[c]chromene-10,3'-indoline]-8-carbaldehyde (5ga)**

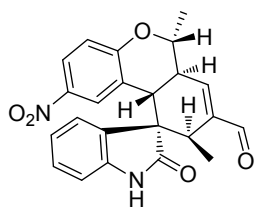

**5ga** White solid; 35% yield; 98% ee; 4:1 dr; m.p. 104 °C-106 °C;

$[\alpha]_{\text{D}}^{22} = -87.1$  ( $c = 0.31$  in  $\text{CHCl}_3$ ); HPLC (DAICEL CORPORATION AD-H), 2-propanol/*n*-hexane = 20/80, flow rate = 1.0 mL/min,  $\lambda = 254$  nm, retention time: 11.05 min (major) and 17.27 min (minor);  $^1\text{H}$  NMR (400 MHz,  $\text{CDCl}_3$ )  $\delta = 9.58$  (s, 1H), 7.93 (dd,  $J = 9.2, 2.4$  Hz, 1H), 7.78 (s, 1H), 7.43 (t,  $J = 7.6$  Hz, 1H), 7.22 (d,  $J = 7.6$  Hz, 1H), 7.17-7.07 (m, 2H), 7.04 (d,  $J = 1.6$  Hz, 1H), 6.86 (d,  $J = 8.8$  Hz, 2H), 4.53 (dq,  $J = 12.4, 6.0$  Hz, 1H), 3.70 (d,  $J = 10.4$  Hz, 1H), 3.31 (t,  $J = 10.8$  Hz, 1H), 2.92 (q,  $J = 6.8$  Hz, 1H), 1.71 (d,  $J = 6.0$  Hz, 3H), 1.26 (d,  $J = 7.2$  Hz, 3H).  $^{13}\text{C}$  NMR (100 MHz,  $\text{CDCl}_3$ )  $\delta = 192.7, 178.7, 160.4, 145.0, 144.3, 140.9, 140.3, 129.9, 129.4, 125.8, 125.0, 124.3, 122.5, 121.7, 117.3, 111.1, 79.0, 50.5, 42.7, 36.6, 34.4, 20.4, 19.1$ . HRMS (ESI-TOF) calcd for  $\text{C}_{23}\text{H}_{20}\text{N}_2\text{O}_5$   $[\text{M}+\text{Na}]^+ = 427.1264$ , Found 427.1277.



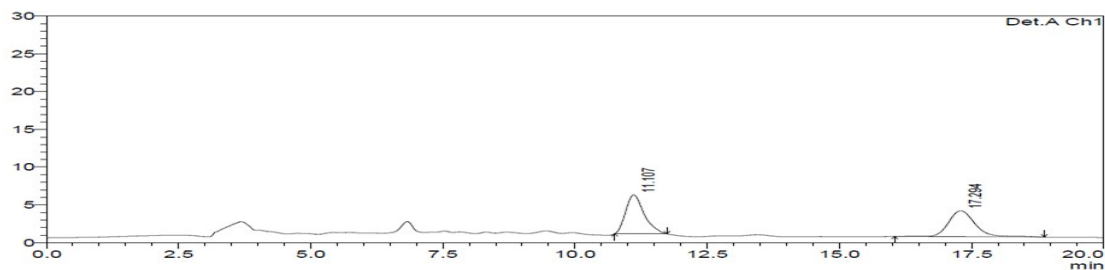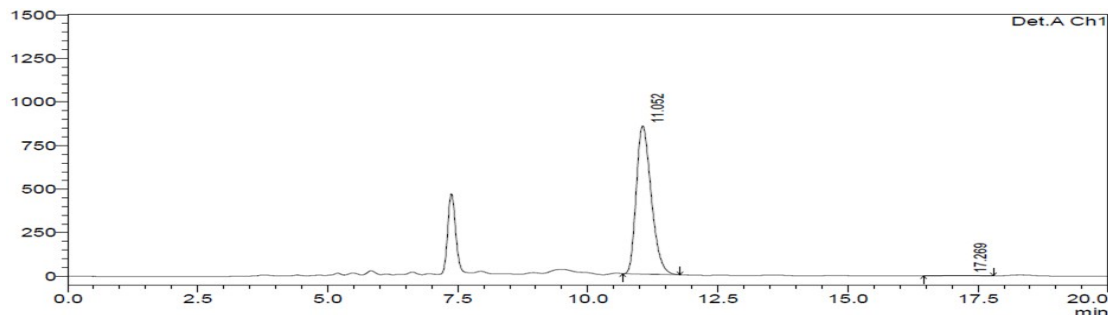

**2,6,9-trimethyl-2'-oxo-6,6a,9,10a-tetrahydrospiro[benzo[*c*]chromene-10,3'-indoline]-8-carbaldehyde (5ha)**

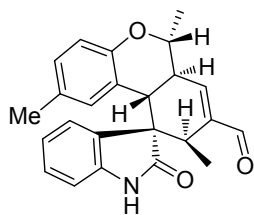

**5ha**

White solid; 75% yield; >99% ee; 5:1 dr; m.p. 75 °C-77 °C;

$[\alpha]_D^{22} = -44.3$  ( $c = 0.33$  in  $\text{CHCl}_3$ ); HPLC (DAICEL CORPORATION AS-H), 2-propanol/*n*-hexane = 10/90, flow rate = 1.0 mL/min,  $\lambda = 254$  nm, retention time: 10.61 min (major) and 12.35 min (minor);  $^1\text{H}$  NMR (400 MHz,  $\text{CDCl}_3$ )  $\delta = 9.54$  (s, 1H), 7.71 (s, 1H), 7.32 (t,  $J = 7.6$  Hz, 1H), 7.18 (d,  $J = 7.6$  Hz, 1H), 7.07-6.94 (m, 2H), 6.82 (dd,  $J = 14.8, 5.2$  Hz, 2H), 6.69 (d,  $J = 8.0$  Hz, 1H), 5.78 (s, 1H), 4.37 (dq,  $J = 12.0, 6.0$  Hz, 1H), 3.66 (d,  $J = 10.4$  Hz, 1H), 3.20 (t,  $J = 10.4$  Hz, 1H), 2.83 (q,  $J = 7.2$  Hz, 1H), 1.84 (s, 3H), 1.60 (d,  $J = 6.0$  Hz, 3H), 1.22 (d,  $J = 7.2$  Hz, 3H).  $^{13}\text{C}$  NMR (100 MHz,  $\text{CDCl}_3$ )  $\delta = 193.1, 179.3, 152.3, 147.2, 143.7, 140.2, 131.1, 129.3, 128.6, 128.3, 126.2, 125.3, 125.1, 122.1, 116.8, 110.0, 50.7, 44.1, 36.5, 34.7, 20.7, 20.7, 18.9$ . HRMS (ESI-TOF) calcd for  $\text{C}_{24}\text{H}_{23}\text{NO}_3$   $[\text{M}+\text{Na}]^+ = 396.1570$ , Found 396.1575.

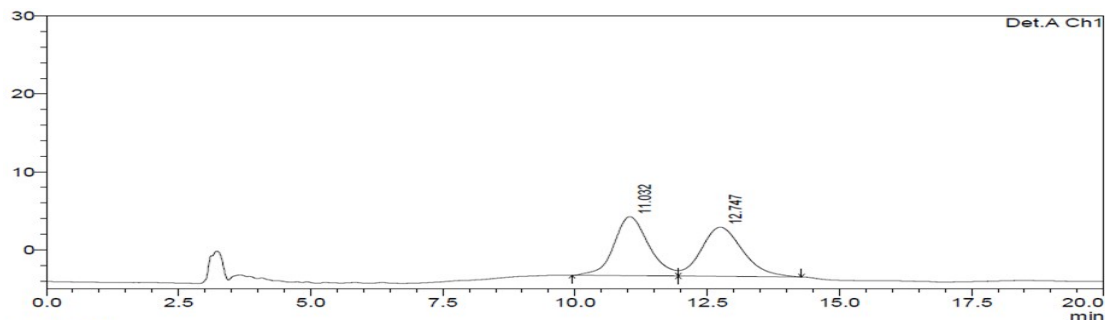

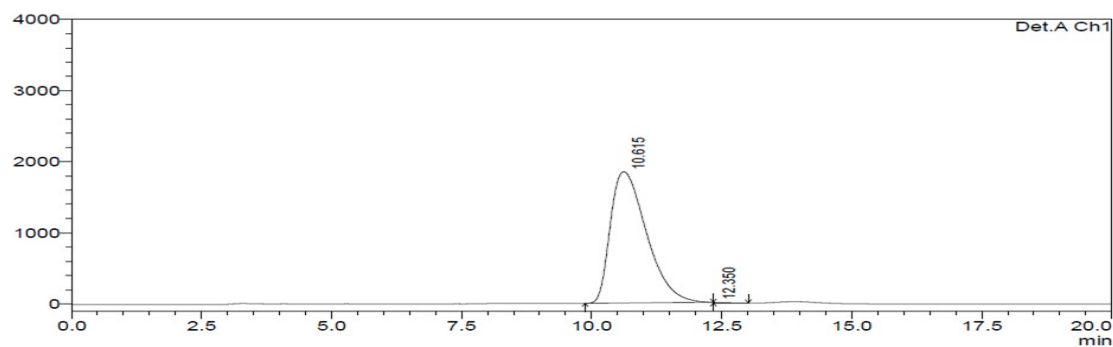

**2,5-dimethyl-2'-oxo-2,4a,5,12c-tetrahydrospiro[dibenzo[c,f]chromene-1,3'-indoline]-3-carbaldehyde (5ib)**

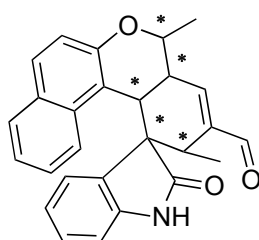

**5ib**

White solid; 65% yield; >99% ee; 1:4 dr; m.p. 60 °C-62 °C;  $[\alpha]_D^{22} = 55.6$  (c = 0.16 in  $\text{CHCl}_3$ ); HPLC (DAICEL CORPORATION AD-H, 2-propanol/*n*-hexane = 20/80, flow rate = 1.0 mL/min,  $\lambda = 254$  nm, retention time: 8.20 min (major) and 9.28 min (minor);  $^1\text{H NMR}$  (400 MHz,  $\text{CDCl}_3$ )  $\delta = 9.71$  (s, 1H), 7.60-7.50 (m, 2H), 7.33 (t,  $J = 7.2$  Hz, 1H), 7.15 (t,  $J = 7.6$  Hz, 1H), 7.05 (dd,  $J = 16.0$ , 8.4 Hz, 4H), 6.72 (d,  $J = 7.8$  Hz, 1H), 6.62 (q,  $J = 8.4$  Hz, 2H), 4.92 (dd,  $J = 6.4$ , 4.0 Hz, 1H), 3.66 (dt,  $J = 12.0$ , 4.4 Hz, 1H), 3.50-3.44 (m, 1H), 3.17 (d,  $J = 6.8$  Hz, 1H), 1.33 (d,  $J = 6.8$  Hz, 4H), 0.98 (d,  $J = 7.2$  Hz, 3H).  $^{13}\text{C NMR}$  (100 MHz,  $\text{CDCl}_3$ )  $\delta = 191.1$ , 178.6, 152.3, 151.9, 142.2, 141.8, 134.8, 133.0, 129.3, 129.2, 128.5, 128.0, 124.3, 123.8, 123.2, 122.8, 122.5, 120.1, 114.5, 109.9, 70.7, 56.4, 43.3, 42.5, 41.4, 22.7, 14.1. HRMS (ESI-TOF) calcd for  $\text{C}_{27}\text{H}_{23}\text{NO}_3$   $[\text{M}+\text{Na}]^+ = 432.1570$ , Found 432.1585.

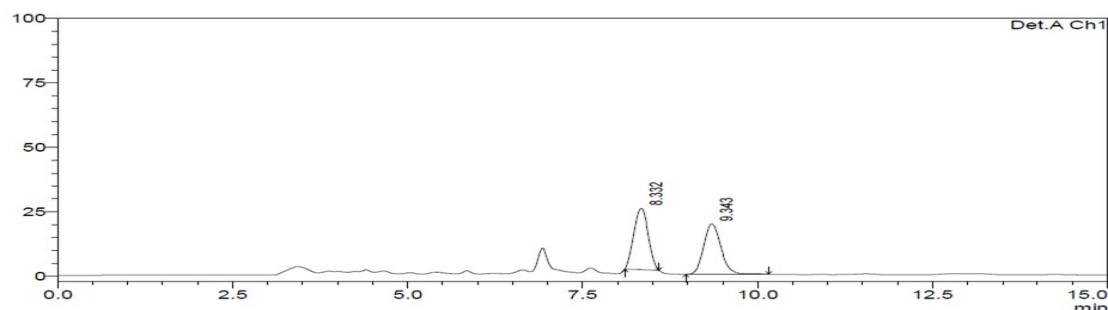

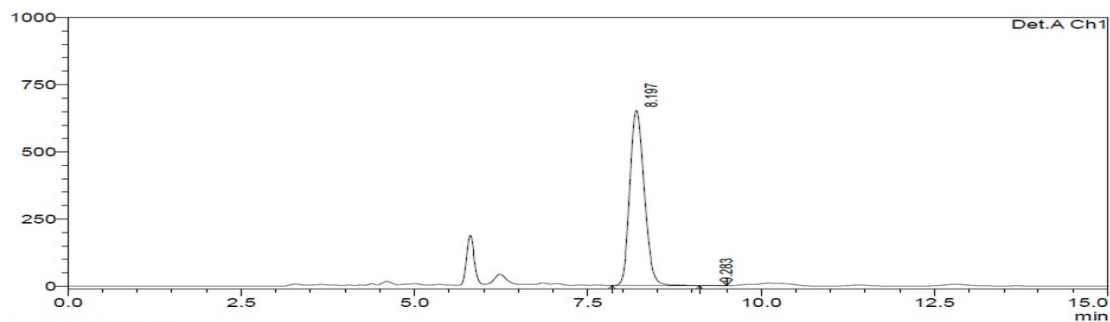

**5',6,9-trimethyl-2'-oxo-6,6a,9,10a-tetrahydrospiro[benzo[c]chromene-10,3'-indoline]-8-carbaldehyde (5ja)**

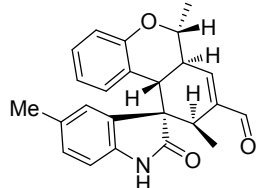

**5ja** White solid; 67% yield; 98% ee; 6:1 dr; m.p. 122 °C-124 °C;  $[\alpha]_D^{22} = -56.4$  ( $c = 0.69$  in  $\text{CHCl}_3$ ); HPLC (DAICEL CORPORATION AS-H), 2-propanol/*n*-hexane = 5/95, flow rate = 1.0 mL/min,  $\lambda = 254$  nm, retention time: 20.85 min (major) and 26.50 min (minor);  $^1\text{H}$  NMR (400 MHz,  $\text{CDCl}_3$ )  $\delta = 9.53$  (s, 1H), 8.34 (s, 1H), 7.08 (d,  $J = 8.0$  Hz, 1H), 7.03-6.95 (m, 2H), 6.82 (t,  $J = 8.0$  Hz, 3H), 6.45 (t,  $J = 7.6$  Hz, 1H), 6.03 (d,  $J = 7.6$  Hz, 1H), 4.40 (dq,  $J = 12.0, 6.0$  Hz, 1H), 3.65 (d,  $J = 10.4$  Hz, 1H), 3.20 (t,  $J = 10.4$  Hz, 1H), 2.80 (q,  $J = 6.8$  Hz, 1H), 2.28 (s, 3H), 1.61 (d,  $J = 6.0$  Hz, 3H), 1.20 (d,  $J = 7.2$  Hz, 3H).  $^{13}\text{C}$  NMR (100 MHz,  $\text{CDCl}_3$ )  $\delta = 193.1, 179.9, 154.6, 147.0, 143.9, 137.8, 131.4, 131.0, 128.9, 127.8, 126.6, 126.0, 124.5, 120.5, 117.1, 110.2, 77.7, 50.8, 44.1, 36.5, 34.8, 21.3, 20.8, 19.0$ . HRMS (ESI-TOF) calcd for  $\text{C}_{24}\text{H}_{23}\text{NO}_3$   $[\text{M}+\text{Na}]^+ = 396.1570$ , Found 396.1581.

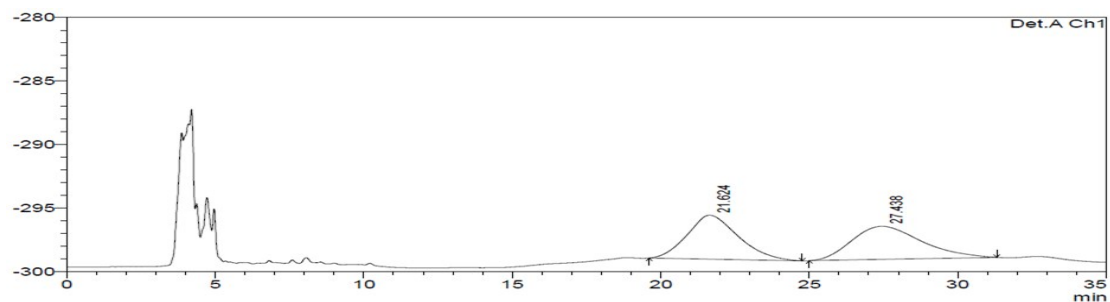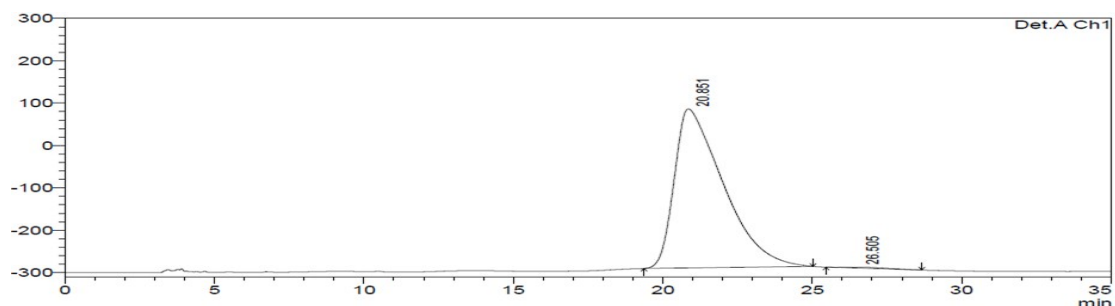

**5'-fluoro-6,9-dimethyl-2'-oxo-6,6a,9,10a-tetrahydrospiro[benzo[c]chromene-10,3'-indoline]-8-carbaldehyde (5ka)**

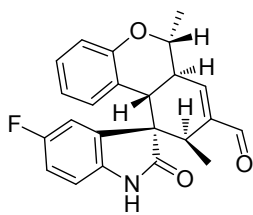

**5ka**

White solid; 80% yield; 96% ee; 6:1 dr; m.p. 109 °C-111 °C;

$[\alpha]_D^{22} = -43.7$  ( $c = 0.35$  in  $\text{CHCl}_3$ ); HPLC (DAICEL CORPORATION AS-H), 2-propanol/*n*-hexane = 10/90, flow rate = 1.0 mL/min,  $\lambda = 254$  nm, retention time: 13.96 min (major) and 20.39 min (minor);  $^1\text{H NMR}$  (400 MHz,  $\text{CDCl}_3$ )  $\delta = 9.54$  (s, 1H), 7.96 (s, 1H), 7.02 (dt,  $J = 8.8, 4.4$  Hz, 2H), 6.96-6.87 (m, 2H), 6.88-6.76 (m, 2H), 6.48 (t,  $J = 7.6$  Hz, 1H), 6.00 (d,  $J = 7.6$  Hz, 1H), 4.40 (dq,  $J = 12.0, 6.0$  Hz, 1H), 3.63 (d,  $J = 10.4$  Hz, 1H), 3.19 (t,  $J = 10.8$  Hz, 1H), 2.84 (q,  $J = 6.8$  Hz, 1H), 1.61 (d,  $J = 6.0$  Hz, 3H), 1.21 (d,  $J = 6.4$  Hz, 3H).  $^{13}\text{C NMR}$  (100 MHz,  $\text{CDCl}_3$ )  $\delta = 192.8, 179.2, 159.8, 154.6, 146.8, 143.4, 136.1, 132.7, 128.0, 125.5, 124.0, 120.5, 117.3, 115.0, 113.8, 110.8, 92.8, 77.6, 51.2, 44.1, 36.6, 34.8, 20.8, 18.8$ . HRMS (ESI-TOF) calcd for  $\text{C}_{23}\text{H}_{20}\text{FNO}_3$   $[\text{M}+\text{Na}]^+ = 400.1319$ , Found 400.1320.

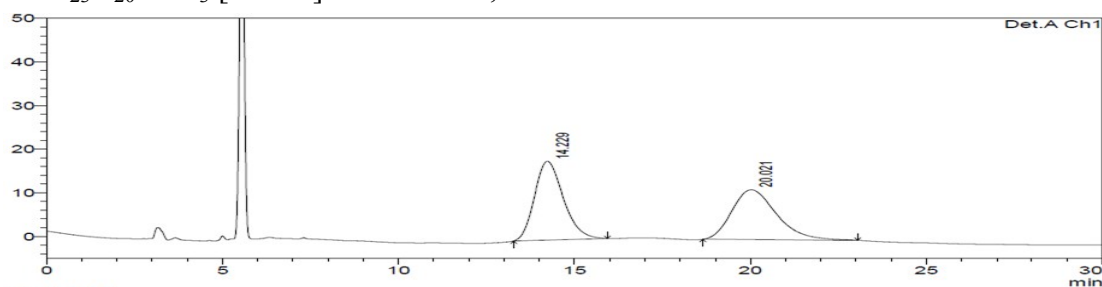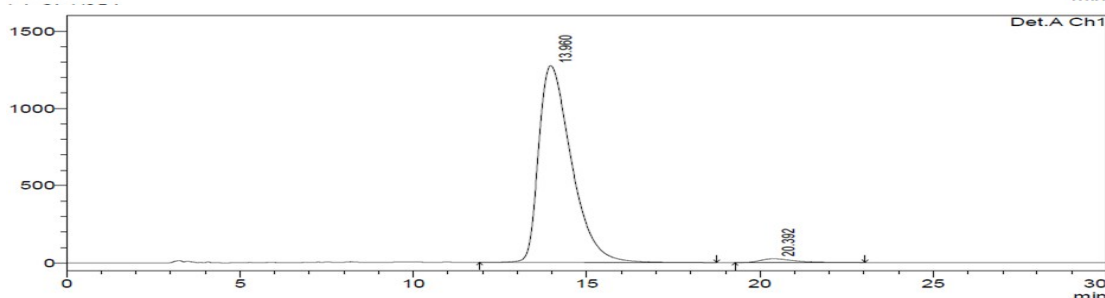

**6'-chloro-6,9-dimethyl-2'-oxo-6,6a,9,10a-tetrahydrospiro[benzo[*c*]chromene-10,3'-indoline]-8-carbaldehyde (5la)**

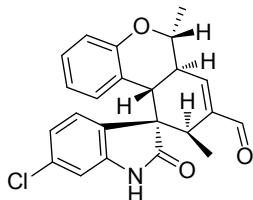

**5la**

light yellow solid; 90% yield; >99% ee; 7:1 dr; m.p. 139 °C-141

°C;  $[\alpha]_D^{22} = -29.0$  ( $c = 1.12$  in  $\text{CHCl}_3$ ); HPLC (DAICEL CORPORATION AS-H), 2-propanol/*n*-hexane = 10/90, flow rate = 1.0 mL/min,  $\lambda = 254$  nm, retention time: 13.96 min (major) and 19.58 min (minor);  $^1\text{H NMR}$  (400 MHz,  $\text{CDCl}_3$ )  $\delta = 9.53$  (s, 1H), 8.99 (s, 1H), 7.09-6.92 (m, 4H), 6.84 (dd,  $J = 12.4, 5.2$  Hz, 2H), 6.48 (t,  $J = 7.6$

Hz, 1H), 5.99 (d,  $J = 7.6$  Hz, 1H), 4.40 (dq,  $J = 12.0, 6.0$  Hz, 1H), 3.65 (d,  $J = 10.4$  Hz, 1H), 3.18 (t,  $J = 10.4$  Hz, 1H), 2.80 (q,  $J = 6.8$  Hz, 1H), 1.63 (d,  $J = 6.0$  Hz, 3H), 1.17 (d,  $J = 6.8$  Hz, 3H).  $^{13}\text{C}$  NMR (100 MHz,  $\text{CDCl}_3$ )  $\delta = 193.0, 180.1, 154.6, 147.0, 143.5, 141.5, 134.3, 129.4, 128.1, 126.6, 125.6, 124.0, 122.1, 120.6, 117.3, 111.3, 77.7, 50.7, 44.1, 36.4, 34.8, 20.8, 18.9$ . HRMS (ESI-TOF) calcd for  $\text{C}_{23}\text{H}_{20}\text{ClNO}_3$   $[\text{M}+\text{Na}]^+ = 416.1024$ , Found 416.1023.

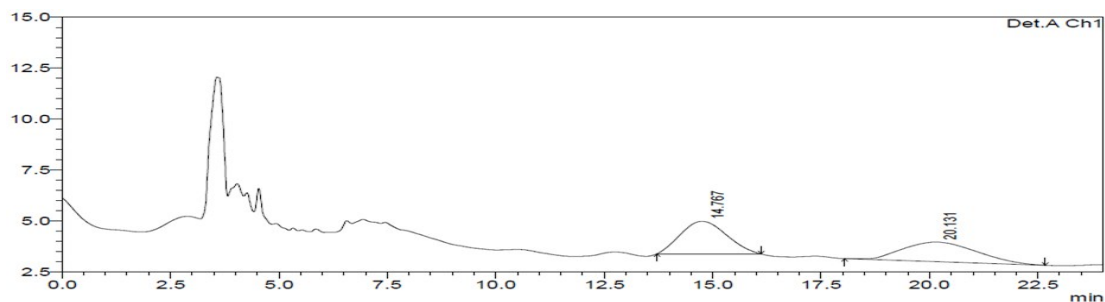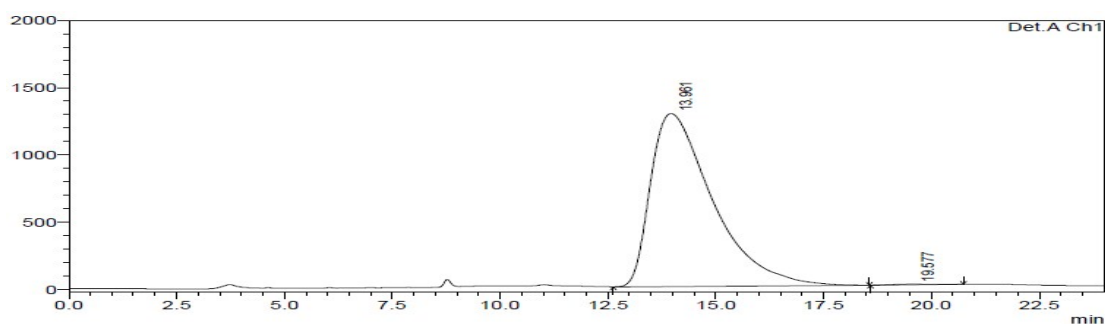

**1',6,9-trimethyl-2'-oxo-6,6a,9,10a-tetrahydrospiro[benzo[c]chromene-10,3'-indoline]-8-carbaldehyde (5ma)**

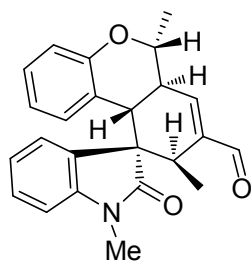

**5ma**

White solid; 31% yield; 94% ee; 10:1 dr; m.p. 62 °C-64 °C;  $[\alpha]_{\text{D}}^{22}$

= -52.0 (c = 0.10 in  $\text{CHCl}_3$ ); HPLC (DAICEL CORPORATION AS-H), 2-propanol/*n*-hexane = 10/90, flow rate = 1.0 mL/min,  $\lambda = 254$  nm, retention time: 17.80 min (major) and 22.07 min (minor);  $^1\text{H}$  NMR (400 MHz,  $\text{CDCl}_3$ )  $\delta = 9.53$  (s, 1H), 7.41 (t,  $J = 7.6$  Hz, 1H), 7.28 (s, 1H), 7.08 (t,  $J = 7.6$  Hz, 1H), 6.99 (dd,  $J = 7.2, 4.0$  Hz, 2H), 6.79 (d,  $J = 8.8$  Hz, 2H), 6.41 (t,  $J = 7.6$  Hz, 1H), 5.86 (d,  $J = 7.6$  Hz, 1H), 5.02-4.87 (m, 1H), 3.79-3.69 (m, 2H), 3.19 (s, 3H), 2.69 (dd,  $J = 14.0, 6.8$  Hz, 1H), 1.42 (d,  $J = 6.4$  Hz, 3H), 1.24 (d,  $J = 7.2$  Hz, 3H).  $^{13}\text{C}$  NMR (100 MHz,  $\text{CDCl}_3$ )  $\delta = 192.8, 177.5, 154.9, 146.9, 143.4, 143.2, 130.7, 128.7, 127.9, 125.6, 125.6, 124.2, 122.1, 120.1, 117.2, 108.8, 77.3, 77.2, 77.0, 76.7, 73.5, 58.5, 50.4, 41.4, 34.7, 19.1, 18.4, 17.8$ . HRMS (ESI-TOF) calcd for  $\text{C}_{24}\text{H}_{23}\text{NO}_3$   $[\text{M}+\text{Na}]^+ = 396.1570$ , Found 396.1573.

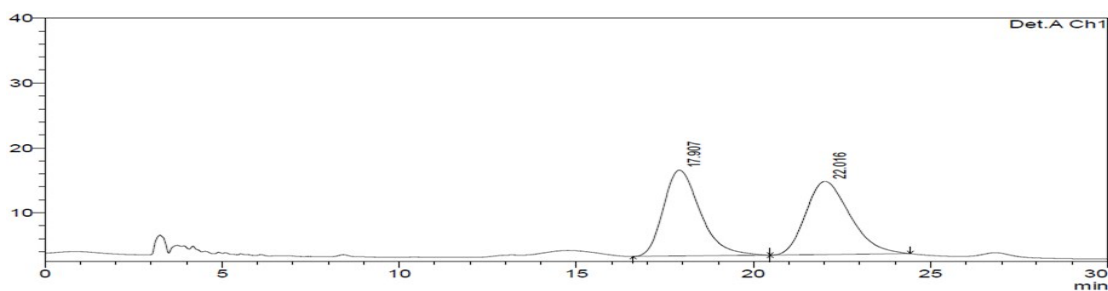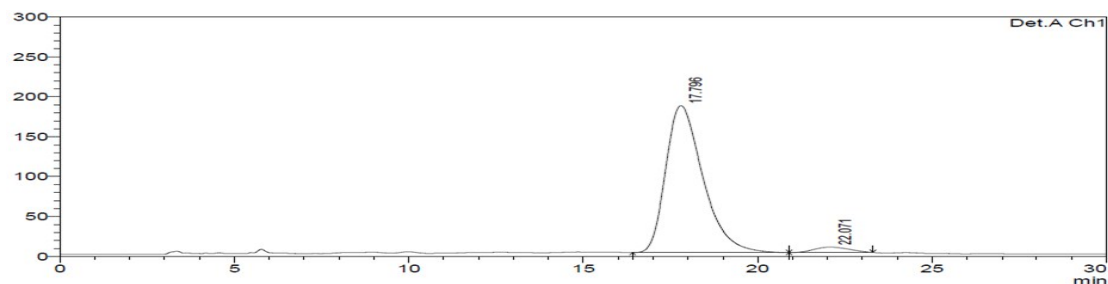

**6,9-dimethyl-2'-oxo-1'-phenyl-6,6a,9,10a-tetrahydrospiro[benzo[c]chromene-10,3'-indoline]-8-carbaldehyde (5na)**

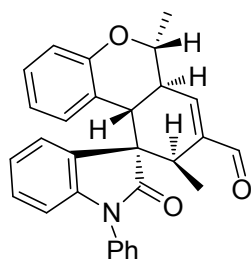

**5na**

White solid; 45% yield; 92% ee; 12:1 dr; m.p. 72 °C-74 °C;  $[\alpha]_D^{22}$

= -25.6 (c = 0.50 in  $\text{CHCl}_3$ ); HPLC (DAICEL CORPORATION AS-H, 2-propanol/*n*-hexane = 3/97, flow rate = 1.0 mL/min,  $\lambda$  = 254 nm, retention time: 32.66 min (major) and 37.55 min (minor);  $^1\text{H}$  NMR (400 MHz,  $\text{CDCl}_3$ )  $\delta$  = 7.49 (t,  $J$  = 7.6 Hz, 2H), 7.39 (d,  $J$  = 7.6 Hz, 1H), 7.34 (t,  $J$  = 6.8 Hz, 4H), 7.10 (t,  $J$  = 7.2 Hz, 1H), 7.03 (t,  $J$  = 7.2 Hz, 1H), 6.95 (d,  $J$  = 7.6 Hz, 1H), 6.83 (d,  $J$  = 7.6 Hz, 1H), 6.79 (d,  $J$  = 2.0 Hz, 1H), 6.49 (t,  $J$  = 7.2 Hz, 1H), 6.14 (d,  $J$  = 7.6 Hz, 1H), 5.05-4.87 (m, 1H), 3.86-3.74 (m, 2H), 2.91 (q,  $J$  = 6.8 Hz, 1H), 1.44 (d,  $J$  = 6.4 Hz, 3H), 1.31 (d,  $J$  = 7.2 Hz, 3H).  $^{13}\text{C}$  NMR (100 MHz,  $\text{CDCl}_3$ )  $\delta$  = 192.8, 177.0, 155.1, 146.8, 143.3, 134.2, 130.4, 129.6, 128.6, 128.2, 128.0, 126.7, 125.9, 125.8, 124.2, 122.6, 120.1, 117.3, 110.1, 73.6, 50.4, 41.5, 34.9, 31.1, 19.0, 17.8. HRMS (ESI-TOF) calcd for  $\text{C}_{29}\text{H}_{25}\text{NO}_3$   $[\text{M}+\text{Na}]^+$  = 458.1727, Found 458.1728.

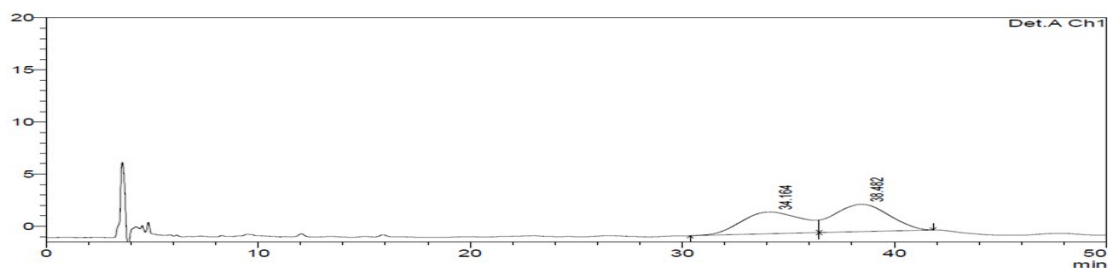

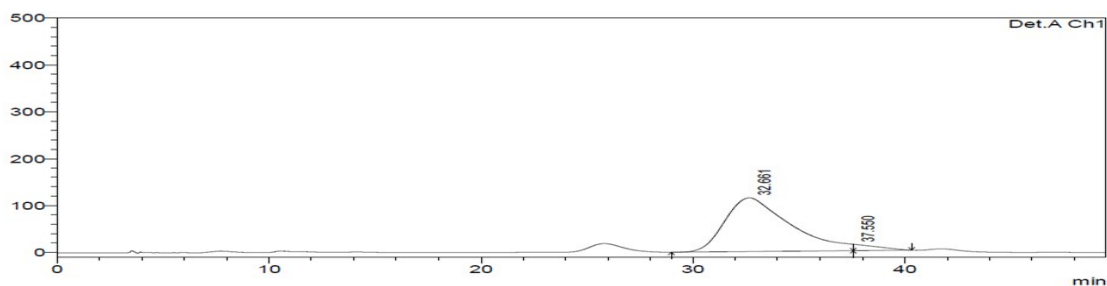

**6',9'-dimethyl-2-oxo-6',6a',9',10a'-tetrahydro-5'H-spiro[indoline-3,10'-phenanthridine]-8'-carbaldehyde (50a)**

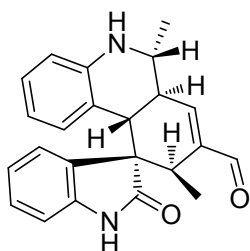

**50a** light orange solid; 83% yield; >99% ee; 2.5:1 dr; m.p. 121 °C-123 °C;  $[\alpha]_D^{22} = -88.8$  ( $c = 0.55$  in  $\text{CHCl}_3$ ); HPLC (DAICEL CORPORATION AD-H), 2-propanol/*n*-hexane = 20/80, flow rate = 1.0 mL/min,  $\lambda = 254$  nm, retention time: 19.96 min (major) and 17.34 min (minor);  $^1\text{H}$  NMR (400 MHz,  $\text{CDCl}_3$ )  $\delta = 9.54$  (s, 1H), 8.37 (s, 1H), 7.24 (d,  $J = 7.6$  Hz, 1H), 7.12 (d,  $J = 7.2$  Hz, 1H), 7.00-6.89 (m, 3H), 6.86 (t,  $J = 7.6$  Hz, 1H), 6.48 (d,  $J = 7.6$  Hz, 1H), 6.21 (t,  $J = 7.6$  Hz, 1H), 5.94 (d,  $J = 7.6$  Hz, 1H), 3.65-3.46 (m, 2H), 2.92 (t,  $J = 10.0$  Hz, 1H), 2.80 (q,  $J = 6.8$  Hz, 1H), 1.47 (d,  $J = 6.0$  Hz, 3H), 1.18 (d,  $J = 6.8$  Hz, 3H).  $^{13}\text{C}$  NMR (100 MHz,  $\text{CDCl}_3$ )  $\delta = 193.4, 180.2, 149.0, 144.5, 143.3, 140.1, 131.5, 128.3, 127.2, 125.8, 124.1, 123.0, 121.9, 117.0, 113.5, 110.3, 53.8, 51.0, 43.3, 37.8, 35.0, 22.4, 18.9$ . HRMS (ESI-TOF) calcd for  $\text{C}_{23}\text{H}_{22}\text{N}_2\text{O}_2$   $[\text{M}+\text{Na}]^+ = 381.1573$ , Found 381.1584.

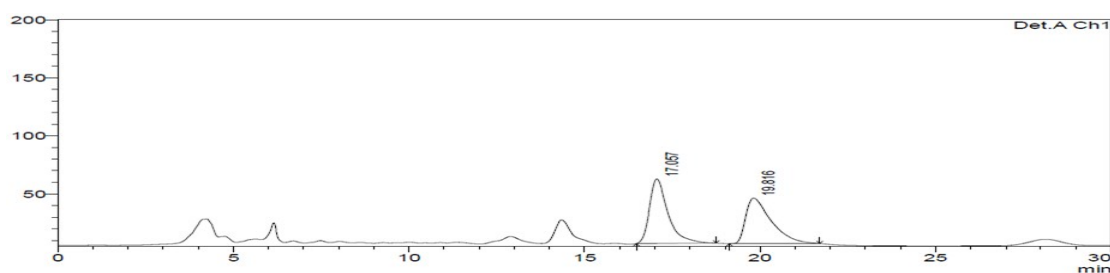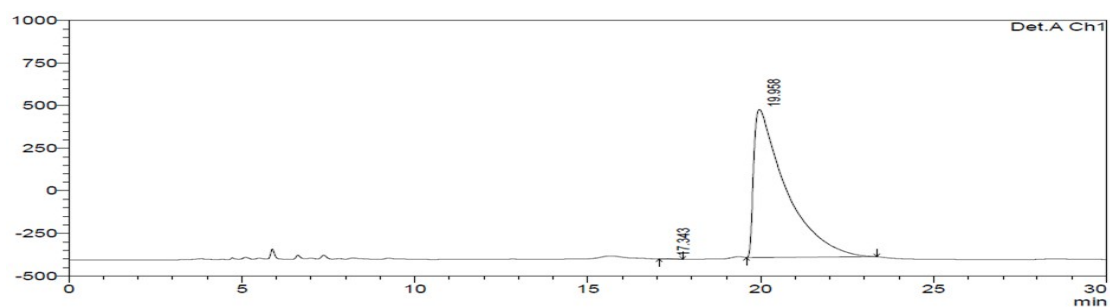

**2'-oxo-6,6a,9,10a-tetrahydrospiro[benzo[c]chromene-10,3'-indoline]-8-carbaldehyde (5pa)**

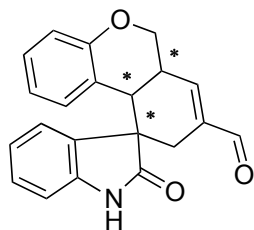

**5pa**

light yellow solid; 55% yield; 64% ee; 1:2.5 dr; m.p. 98 °C-100

°C;  $[\alpha]_D^{22} = 14.6$  ( $c = 0.35$  in  $\text{CHCl}_3$ ); HPLC (DAICEL CORPORATION AS-H), 2-propanol/*n*-hexane = 20/80, flow rate = 1.0 mL/min,  $\lambda = 254$  nm, retention time: 16.65 min (major) and 23.05 min (minor);  $^1\text{H}$  NMR (400 MHz,  $\text{CDCl}_3$ )  $\delta = 9.57$  (s, 1H), 8.28 (s, 1H), 7.32 (t,  $J = 7.6$  Hz, 1H), 7.22 (d,  $J = 7.6$  Hz, 1H), 7.12 (t,  $J = 7.6$  Hz, 1H), 7.06-6.93 (m, 2H), 6.82 (s, 1H), 6.78 (d,  $J = 8.0$  Hz, 1H), 6.44 (t,  $J = 7.2$  Hz, 1H), 6.18 (d,  $J = 8.0$  Hz, 1H), 4.68 (dd,  $J = 10.0, 4.0$  Hz, 1H), 4.18-4.07 (m, 1H), 3.95 (t,  $J = 11.2$  Hz, 1H), 3.51 (d,  $J = 10.4$  Hz, 1H), 2.78 (d,  $J = 18.8$  Hz, 1H), 2.65 (d,  $J = 18.8$  Hz, 1H).  $^{13}\text{C}$  NMR (100 MHz,  $\text{CDCl}_3$ )  $\delta = 192.7, 179.7, 154.8, 146.3, 139.9, 138.3, 134.5, 128.7, 128.4, 125.4, 123.6, 122.9, 122.6, 120.4, 117.1, 110.4, 70.2, 47.5, 41.4, 35.6, 34.4$ . HRMS (ESI-TOF) calcd for  $\text{C}_{21}\text{H}_{17}\text{NO}_3$   $[\text{M}+\text{Na}]^+ = 354.1101$ , Found 354.1103.

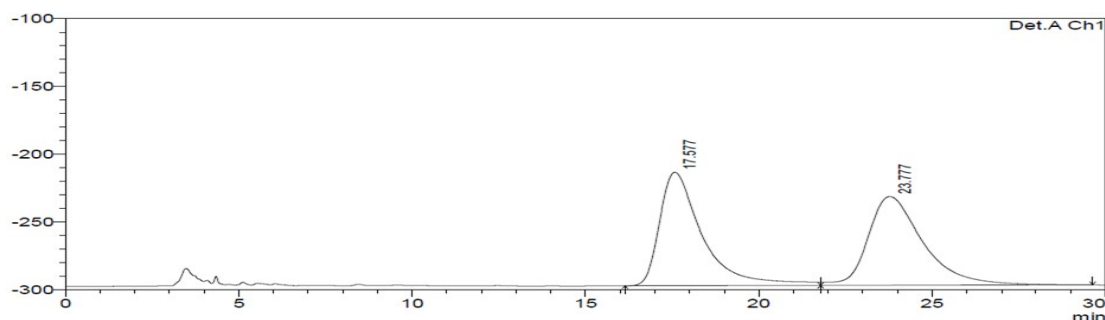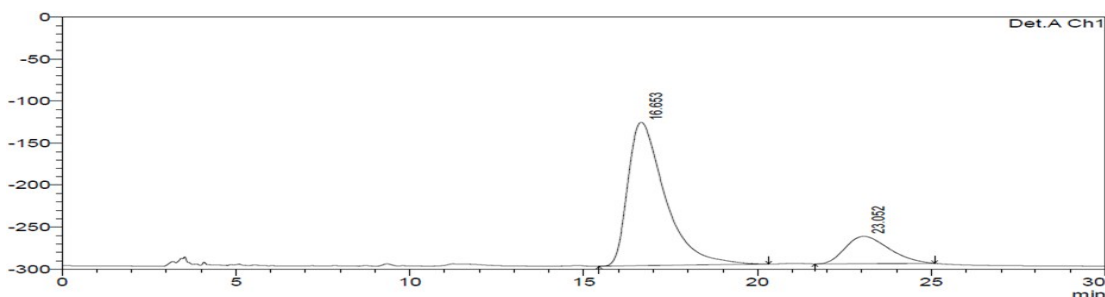

**6,9-diethyl-2'-oxo-6,6a,9,10a-tetrahydrospiro[benzo[c]chromene-10,3'-indoline]-8-carbaldehyde (5qa)**



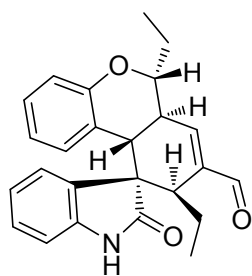

**5qa** yellow solid; 60% yield; >99% ee; 3:1 dr; m.p. 53 °C-55 °C;  $[\alpha]_D^{22} = -86.3$  (c = 0.23 in  $\text{CHCl}_3$ ); HPLC (DAICEL CORPORATION AD-H, 2-propanol/*n*-hexane = 5/95, flow rate = 1.0 mL/min,  $\lambda = 220$  nm, retention time: 22.05 min (major) and 30.51 min (minor);  $^1\text{H NMR}$  (400 MHz,  $\text{CDCl}_3$ )  $\delta = 9.58$  (s, 1H), 8.03 (s, 1H), 7.31 (t,  $J = 7.6$  Hz, 1H), 7.21 (d,  $J = 7.6$  Hz, 1H), 7.00 (dd,  $J = 16.4, 7.6$  Hz, 3H), 6.85 (dd,  $J = 13.6, 5.2$  Hz, 2H), 6.46 (t,  $J = 7.6$  Hz, 1H), 5.99 (d,  $J = 7.6$  Hz, 1H), 4.33-4.17 (m, 1H), 3.70 (d,  $J = 10.4$  Hz, 1H), 3.19 (t,  $J = 10.0$  Hz, 1H), 2.74 (t,  $J = 5.8$  Hz, 1H), 2.12-2.03 (m, 1H), 1.93-1.84 (m, 1H), 1.78 (dt,  $J = 14.4, 7.2$  Hz, 1H), 1.54-1.45 (m, 1H), 1.17 (t,  $J = 7.2$  Hz, 3H), 0.73 (t,  $J = 7.2$  Hz, 3H).  $^{13}\text{C NMR}$  (100 MHz,  $\text{CDCl}_3$ )  $\delta = 193.1, 179.5, 154.9, 147.6, 142.6, 140.1, 131.0, 128.6, 127.8, 126.7, 125.7, 123.9, 122.3, 120.5, 117.2, 110.3, 82.1, 51.2, 42.2, 40.8, 37.6, 27.3, 26.4, 13.1, 9.2$ . HRMS (ESI-TOF) calcd for  $\text{C}_{25}\text{H}_{25}\text{NO}_3$   $[\text{M}+\text{Na}]^+ = 410.1727$ , Found 410.1725.

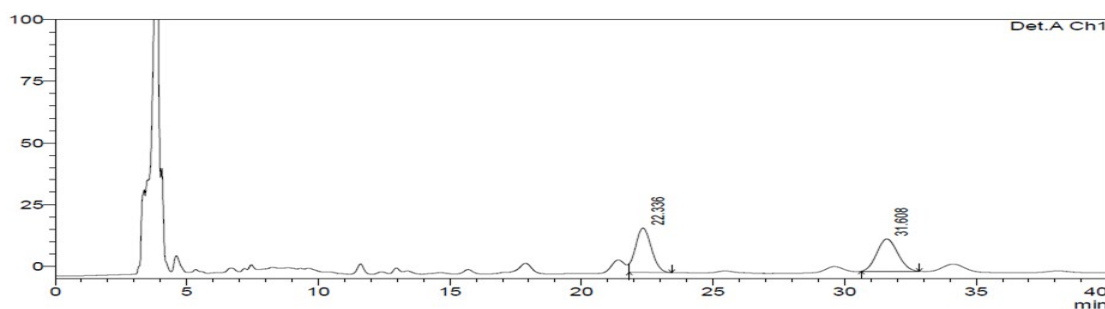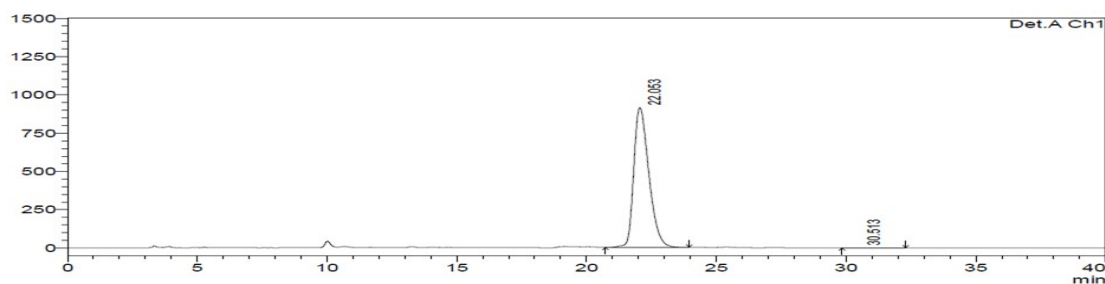

**2'-oxo-6,9-dipropyl-6,6a,9,10a-tetrahydrospiro[benzo[*c*]chromene-10,3'-indoline]-8-carbaldehyde (5ra)**

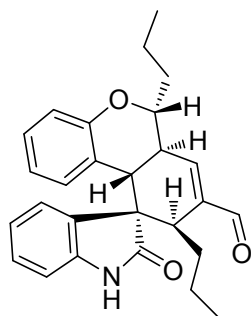

**5ra**

yellow solid; 78% yield; >99% ee; 4:1 dr; m.p. 129 °C-131 °C;  $[\alpha]_D^{22} = -84.7$  ( $c = 0.66$  in  $\text{CHCl}_3$ ); HPLC (DAICEL CORPORATION AD-H), 2-propanol/*n*-hexane = 7/93, flow rate = 1.0 mL/min,  $\lambda = 220$  nm, retention time: 13.68 min (major) and 21.51 min (minor);  $^1\text{H}$  NMR (400 MHz,  $\text{CDCl}_3$ )  $\delta = 9.57$  (s, 1H), 8.60 (s, 1H), 7.30 (td,  $J = 7.6, 0.8$  Hz, 1H), 7.19 (d,  $J = 7.2$  Hz, 1H), 7.06-6.93 (m, 3H), 6.83 (t,  $J = 5.6$  Hz, 2H), 6.46 (t,  $J = 7.6$  Hz, 1H), 5.98 (d,  $J = 7.6$  Hz, 1H), 4.39-4.19 (m, 1H), 3.69 (d,  $J = 10.4$  Hz, 1H), 3.16 (td,  $J = 10.8, 1.6$  Hz, 1H), 2.76 (t,  $J = 5.6$  Hz, 1H), 1.99-1.88 (m, 1H), 1.79-1.72 (m, 3H), 1.66-1.55 (m, 1H), 1.46-1.34 (m, 1H), 1.23-1.15 (m, 1H), 1.05 (t,  $J = 7.2$  Hz, 4H), 0.96-0.79 (m, 3H), 0.75 (t,  $J = 7.2$  Hz, 3H).  $^{13}\text{C}$  NMR (100 MHz,  $\text{CDCl}_3$ )  $\delta = 193.1, 180.3, 154.8, 147.3, 143.1, 140.2, 131.0, 128.6, 127.7, 126.8, 125.4, 124.0, 122.3, 120.6, 117.3, 110.6, 80.9, 51.2, 42.7, 39.9, 37.6, 36.6, 36.0, 22.1, 18.2, 14.2, 14.1$ . HRMS (ESI-TOF) calcd for  $\text{C}_{27}\text{H}_{29}\text{NO}_3$   $[\text{M}+\text{Na}]^+ = 438.2040$ , Found 438.2042.

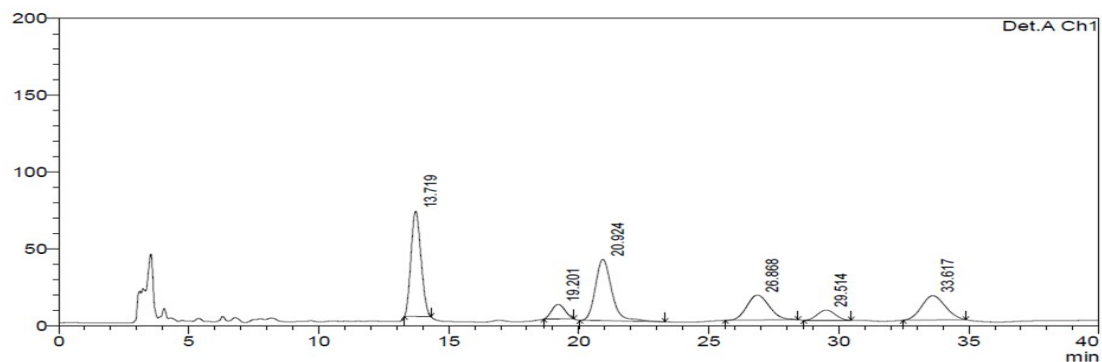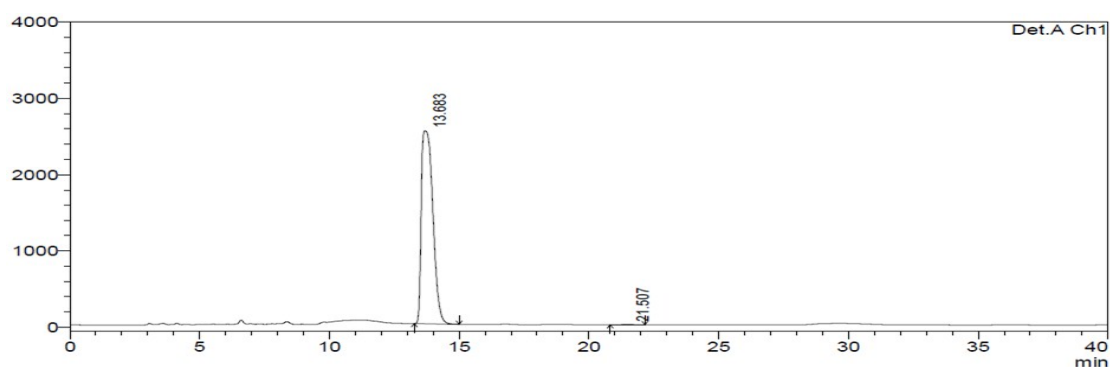

**2,2-dimethyl-4-(2-oxindolin-3-yl)chroman-3-carbaldehyde (5s)**

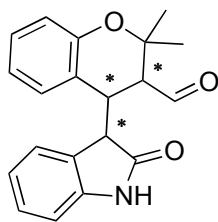

**5s**

White solid; 55% yield; 87% ee; >20:1 dr; m.p. 95 °C- 97 °C;  $[\alpha]_D^{22} = 23.6$  ( $c = 0.6$  in  $\text{CHCl}_3$ ); HPLC (DAICEL CORPORATION AD-H, 2-propanol/*n*-hexane = 10/90, flow rate = 1.0 mL/min,  $\lambda = 254$  nm, retention time: 28.39 min (major) and 33.70 min (minor);  $^1\text{H NMR}$  (400 MHz,  $\text{CDCl}_3$ )  $\delta = 9.70$  (d,  $J = 4.0$  Hz, 1H), 8.65 (s, 1H), 7.29 (d,  $J = 7.6$  Hz, 1H), 7.20 (dd,  $J = 14.4, 7.2$  Hz, 2H), 6.95 (t,  $J = 7.6$  Hz, 1H), 6.85 (dd,  $J = 14.4, 7.6$  Hz, 3H), 6.33 (d,  $J = 7.2$  Hz, 1H), 4.28 (dd,  $J = 10.8, 2.4$  Hz, 1H), 4.06 (d,  $J = 2.0$  Hz, 1H), 1.36 (s, 3H), 1.24 (s, 3H).  $^{13}\text{C NMR}$  (100 MHz,  $\text{CDCl}_3$ )  $\delta = 202.2, 178.5, 153.6, 141.5, 128.6, 128.5, 127.4, 126.4, 124.4, 122.9, 121.5, 121.1, 118.2, 110.3, 74.2, 57.1, 49.8, 33.4, 28.1, 21.2$ . HRMS (ESI-TOF) calcd for  $\text{C}_{20}\text{H}_{19}\text{NO}_3$   $[\text{M}+\text{Na}]^+ = 344.1257$ , Found 344.1248

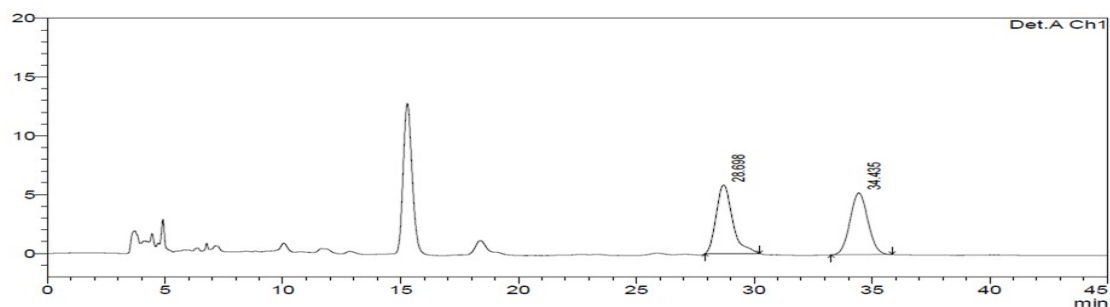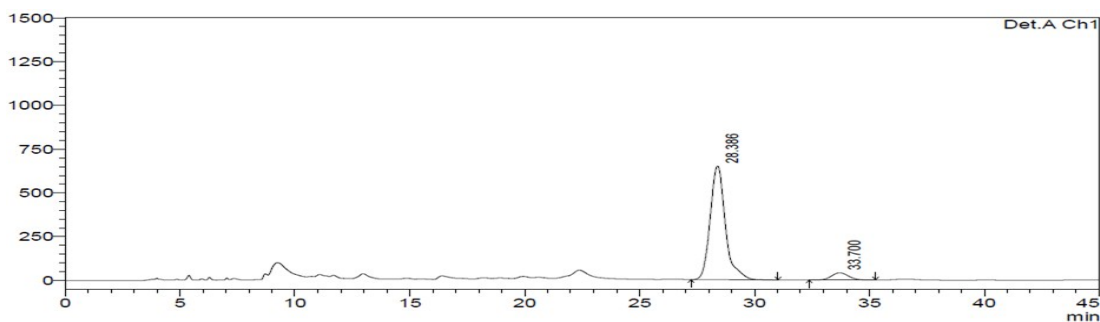

**6,6,9-trimethyl-2'-oxo-6,6a,9,10a-tetrahydrospiro[benzo[*c*]chromene-10,3'-indoline]-8-carbaldehyde (5sa)**

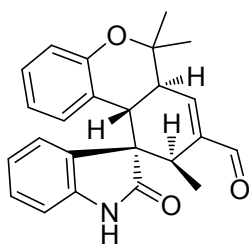

**5sa**

White solid; 50% yield; 97% ee; 5:1 dr; m.p. 65 °C-67 °C;  $[\alpha]_D^{22} = -59.2$  ( $c = 0.31$  in  $\text{CHCl}_3$ ); HPLC (DAICEL CORPORATION AS-H, 2-propanol/*n*-hexane = 10/90, flow rate = 1.0 mL/min,  $\lambda = 254$  nm, retention time: 12.13 min

(major) and 14.02 min (minor);  $^1\text{H}$  NMR (400 MHz,  $\text{CDCl}_3$ )  $\delta$  = 9.54 (s, 1H), 8.19 (s, 1H), 7.29 (t,  $J$  = 7.6 Hz, 1H), 7.19 (d,  $J$  = 7.2 Hz, 1H), 7.06-6.91 (m, 3H), 6.81 (dd,  $J$  = 14.4, 5.2 Hz, 2H), 6.49 (t,  $J$  = 7.6 Hz, 1H), 6.06 (d,  $J$  = 7.6 Hz, 1H), 3.65 (d,  $J$  = 10.8 Hz, 1H), 3.25 (d,  $J$  = 10.8 Hz, 1H), 2.81 (q,  $J$  = 6.8 Hz, 1H), 1.61 (s, 3H), 1.43 (s, 3H), 1.23 (d,  $J$  = 7.2 Hz, 3H).  $^{13}\text{C}$  NMR (100 MHz,  $\text{CDCl}_3$ )  $\delta$  = 192.9, 179.7, 154.5, 147.7, 143.3, 140.1, 131.1, 128.5, 128.0, 127.7, 125.8, 123.8, 122.1, 120.8, 117.7, 110.3, 79.6, 50.7, 48.2, 34.5, 33.0, 28.8, 24.5, 18.8. HRMS (ESI-TOF) calcd for  $\text{C}_{24}\text{H}_{23}\text{NO}_3$   $[\text{M}+\text{Na}]^+$  = 396.1570, Found 396.1576.

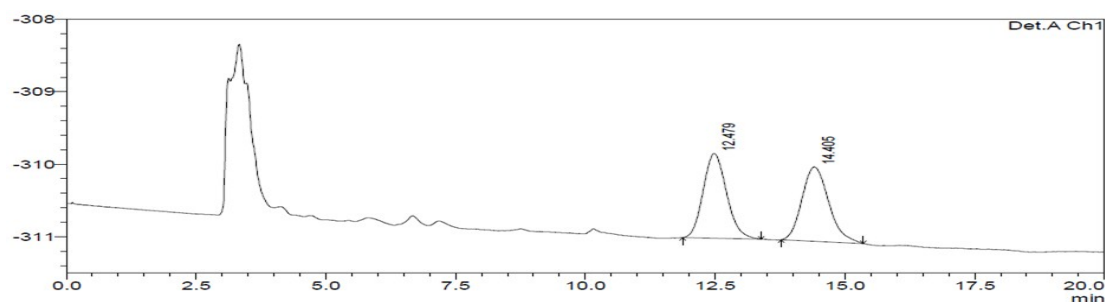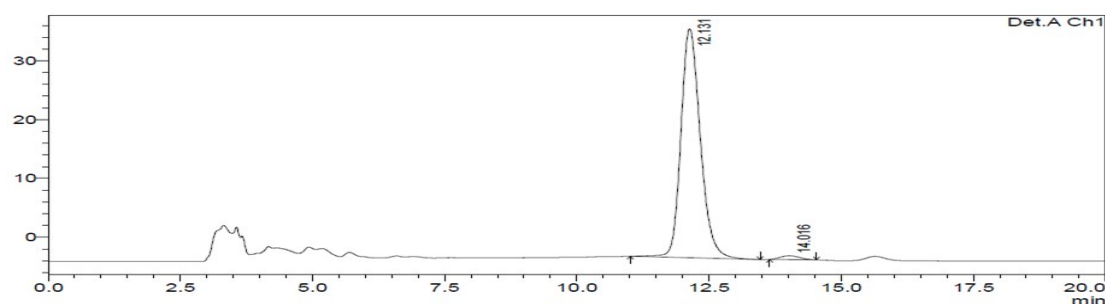

**6,9-dimethyl-1',3'-dioxo-1',3',6,6a,9,10a-hexahydrospiro[benzo[*c*]chromene-10,2'-indene]-8-carbaldehyde (5ta)**

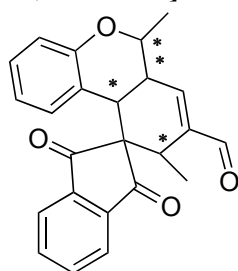

**5ta**

White solid; 70% yield; >99% ee; 2: 1 dr; m.p. 220 °C-222 °C;  $[\alpha]_{\text{D}}^{22}$  = -45.3 ( $c$  = 0.21 in  $\text{CHCl}_3$ ); HPLC (DAICEL CORPORATION AS-H), 2-propanol/*n*-hexane = 10/90, flow rate = 1.0 mL/min,  $\lambda$  = 254 nm, retention time: 21.36 min (major) and 35.74 min (minor);  $^1\text{H}$  NMR (400 MHz,  $\text{CDCl}_3$ )  $\delta$  = 9.49 (s, 1H), 8.16-8.07 (m, 1H), 7.98-7.86 (m, 3H), 7.02 (t,  $J$  = 7.6 Hz, 1H), 6.84 (dd,  $J$  = 15.2, 5.2 Hz, 2H), 6.47 (t,  $J$  = 7.6 Hz, 1H), 6.23 (d,  $J$  = 7.6 Hz, 1H), 4.40 (dq,  $J$  = 12.0, 6.0 Hz, 1H), 3.79 (d,  $J$  = 10.8 Hz, 1H), 3.25 (t,  $J$  = 10.8 Hz, 1H), 2.89 (q,  $J$  = 6.8 Hz, 1H), 1.64 (d,  $J$  = 6.0 Hz, 3H), 1.16 (d,  $J$  = 6.8 Hz, 3H).  $^{13}\text{C}$  NMR (100 MHz,  $\text{CDCl}_3$ )  $\delta$  =

200.4, 199.7, 192.6, 154.5, 147.1, 143.7, 141.1, 141.0, 136.1, 136.0, 128.2, 124.4, 124.1, 124.1, 123.9, 120.1, 117.3, 77.6, 56.3, 43.7, 35.9, 33.9, 20.6, 18.0. HRMS (ESI-TOF) calcd for  $C_{24}H_{20}O_4 [M+Na]^+$  = 395.1254, Found 395.1259.

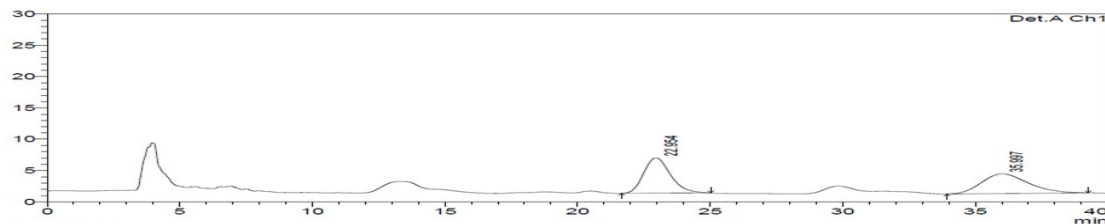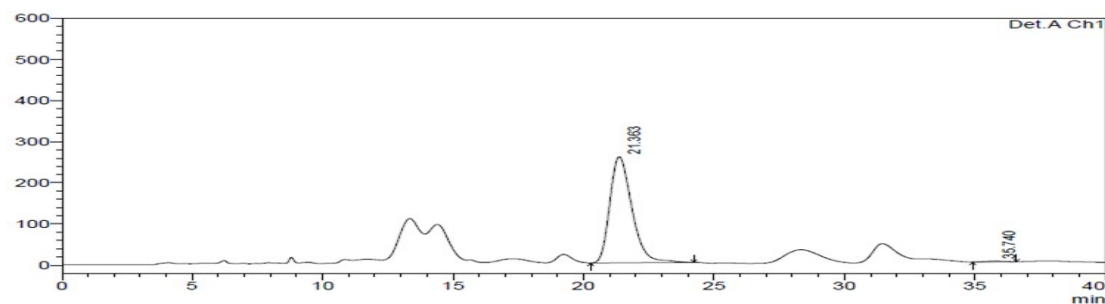

### (I) References

- (1) Synthesis and anti-tyrosine kinase activity of 3-(substituted-benzylidene)-1, 3-dihydro-indolin derivatives: investigation of their role against p60c-Src receptor tyrosine kinase with the application of receptor docking studies. Sureyya Olgen, Eiichi Akaho, Dogu Nebioglu aS. Olgen et al. / *Il Farmaco* 60 (2005) 497–506
- (2) Synthesis and In Vitro Evaluation of Oxindole Derivatives as Potential Radioligands for 5-HT7 Receptor Imaging with PET Quick ViewFull Text By Herth, Matthias M. et al From *ACS Chemical Neuroscience*, 3(12), 1002-1007; 2012

## (J) Copies of NMR Spectra

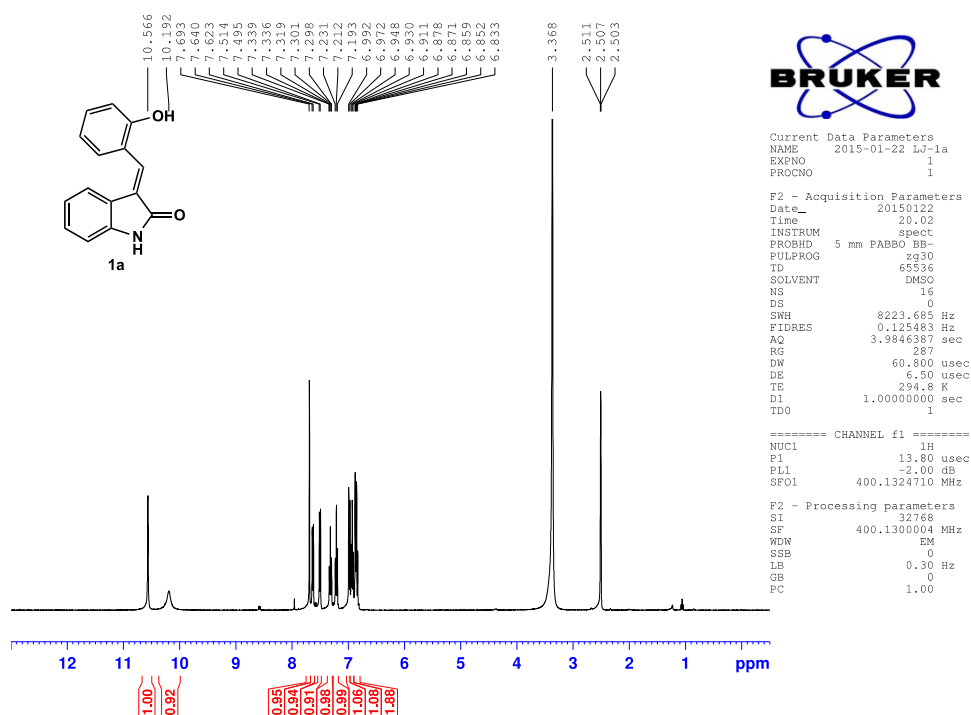

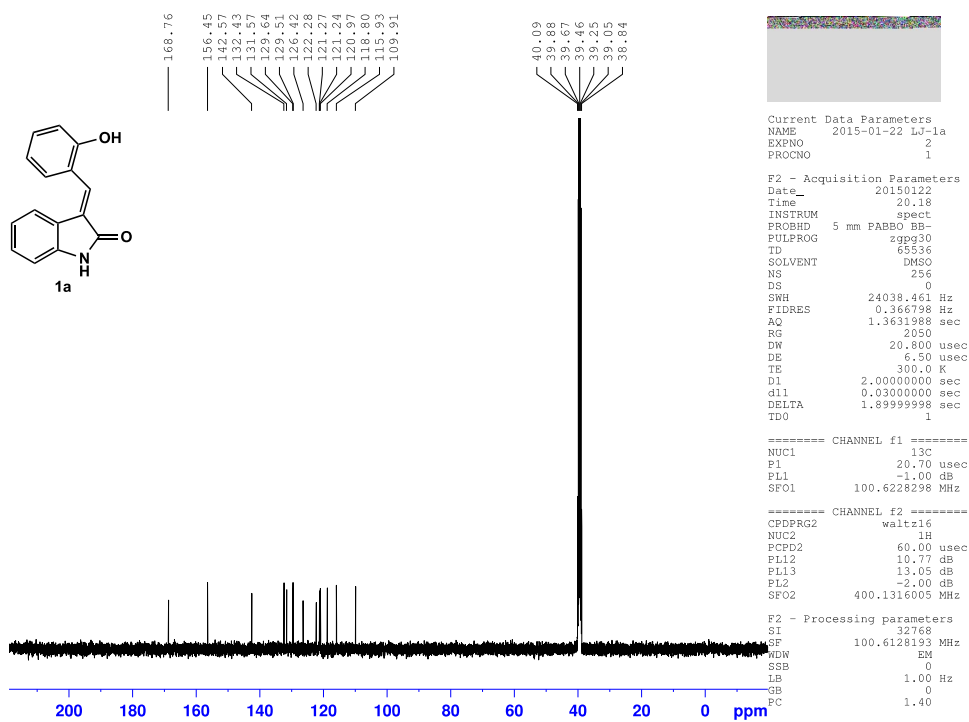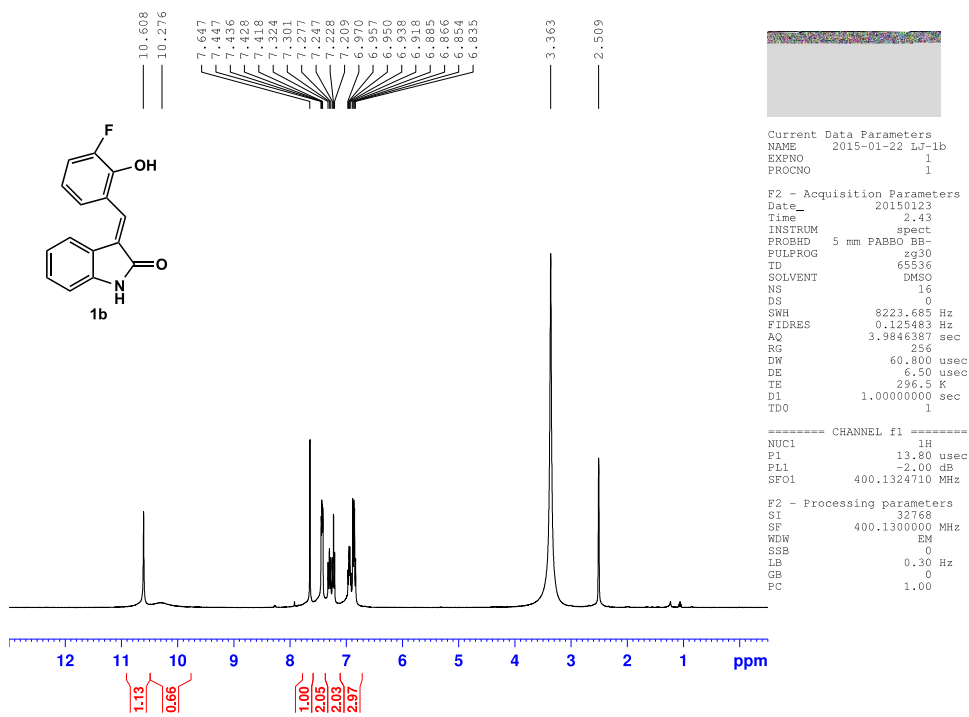

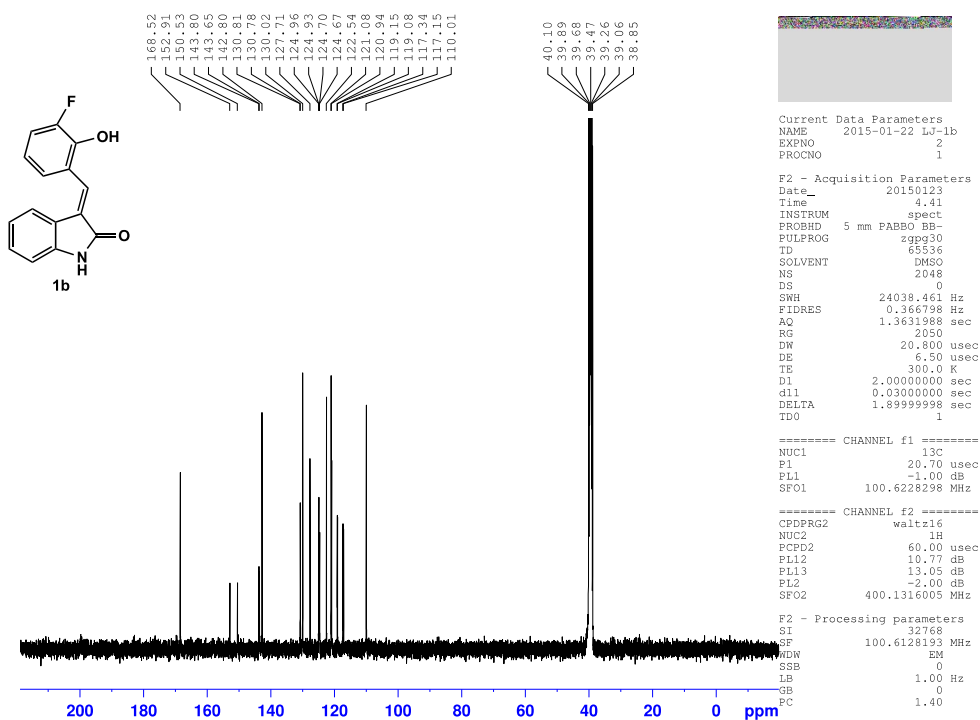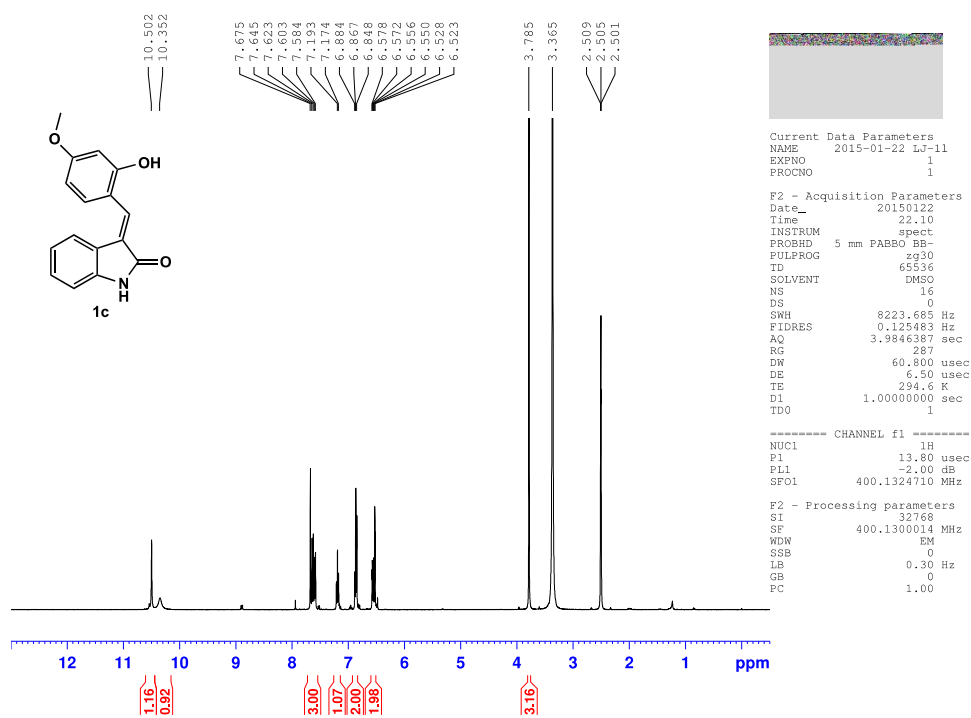



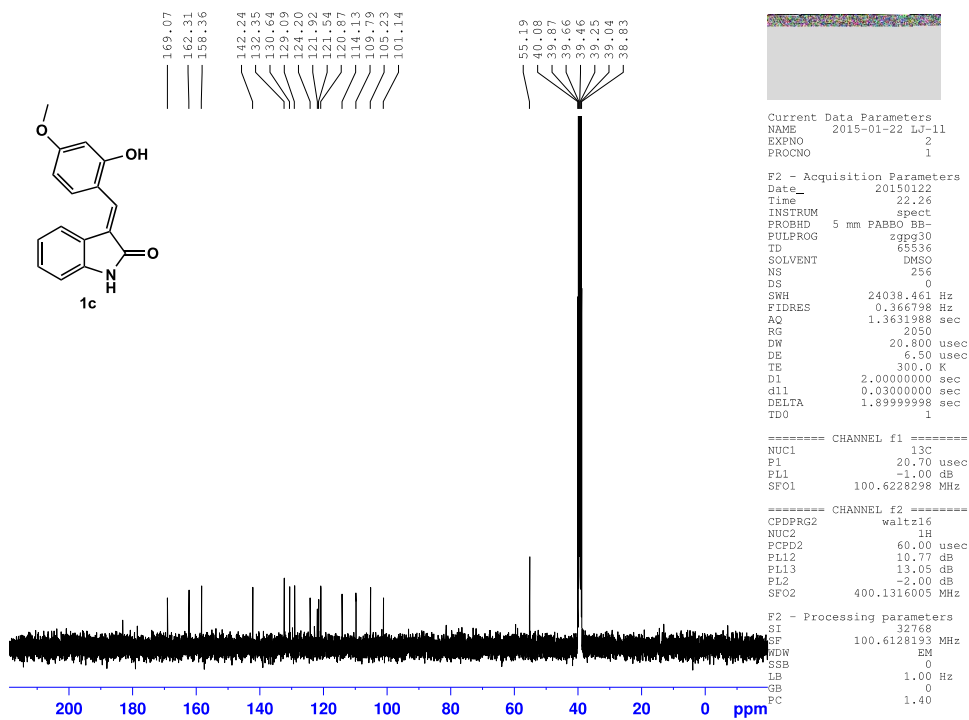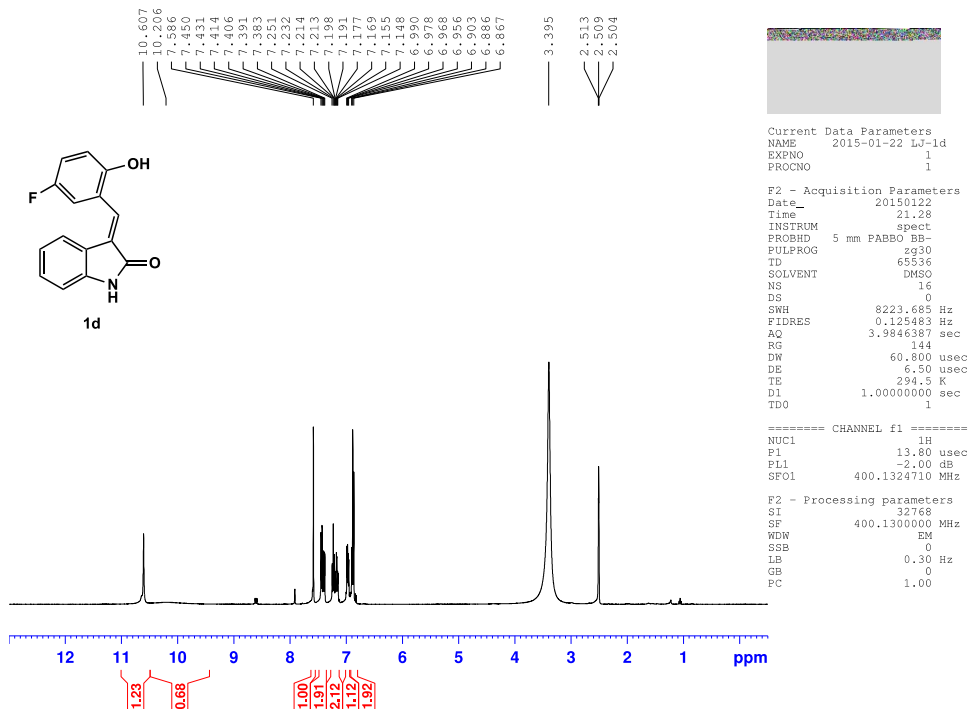

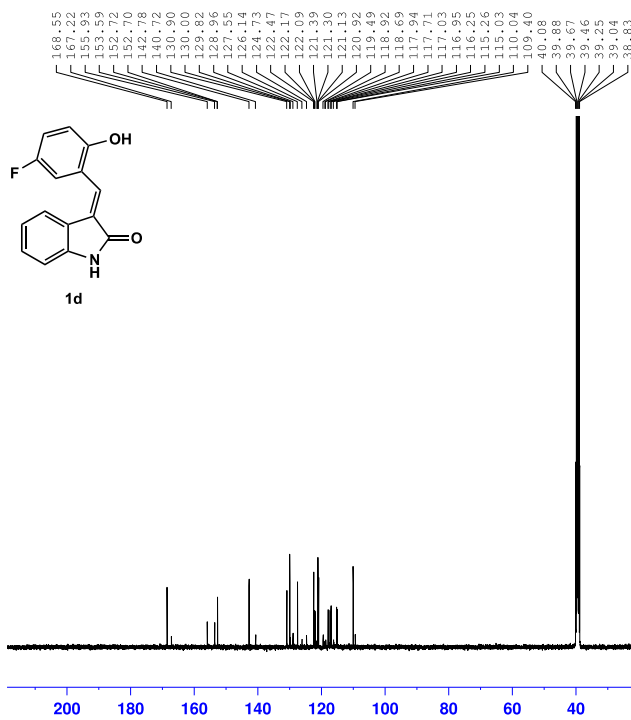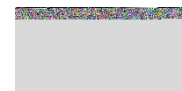

Current Data Parameters  
 NAME 2015-01-22 LJ-1d  
 EXPNO 3  
 PROCNO 1

F2 - Acquisition Parameters  
 Date\_ 20150123  
 Time 7.06  
 INSTRUM spect  
 PROBHD 5 mm PABBO BB-  
 PULPROG zgpg30  
 TD 65536  
 SOLVENT DMSO  
 NS 2048  
 DS 0  
 SWH 24038.461 Hz  
 FIDRES 0.366798 Hz  
 AQ 1.5631988 sec  
 RG 2050  
 DW 20.800 usec  
 DE 6.50 usec  
 TE 300.0 K  
 D1 2.00000000 sec  
 d11 0.03000000 sec  
 DELTA 1.89999998 sec  
 TDO 1

===== CHANNEL f1 =====  
 NUC1 13C  
 P1 20.70 usec  
 PL1 -1.00 dB  
 SFO1 100.6228298 MHz

===== CHANNEL f2 =====  
 CPDPRG2 waltz16  
 NUC2 1H  
 PCPD2 60.00 usec  
 PL12 10.77 dB  
 PL13 13.05 dB  
 PL2 -2.00 dB  
 SFO2 400.1316005 MHz

F2 - Processing parameters  
 SI 32768  
 SF 100.6128193 MHz  
 WDN EM  
 SSB 0  
 LB 1.00 Hz  
 GB 0  
 PC 1.40

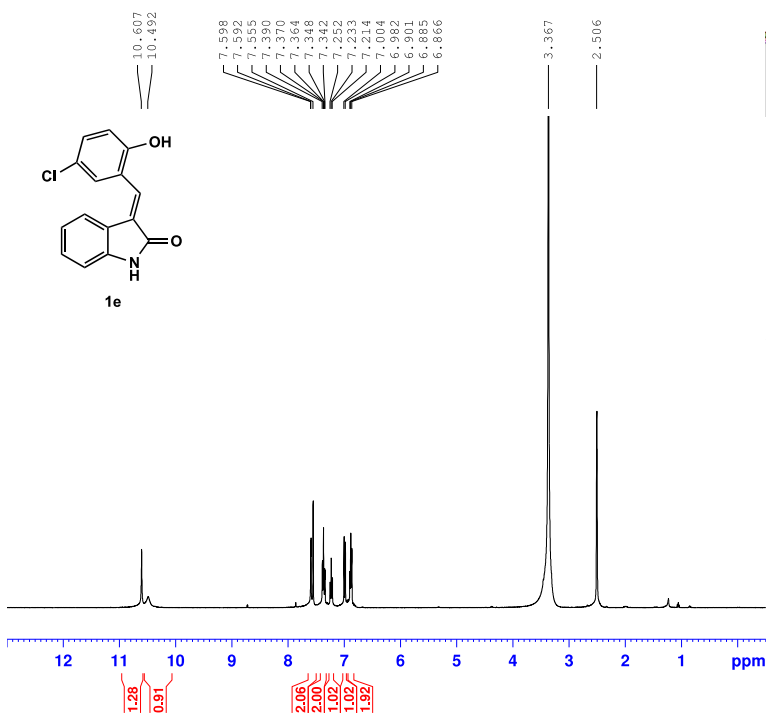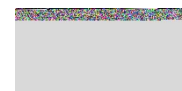

Current Data Parameters  
 NAME 2015-01-22 LJ-1e  
 EXPNO 1  
 PROCNO 1

F2 - Acquisition Parameters  
 Date\_ 20150122  
 Time 23.14  
 INSTRUM spect  
 PROBHD 5 mm PABBO BB-  
 PULPROG zg30  
 TD 65536  
 SOLVENT DMSO  
 NS 16  
 DS 0  
 SWH 8223.685 Hz  
 FIDRES 0.125483 Hz  
 AQ 3.9846387 sec  
 RG 287  
 DW 60.800 usec  
 DE 6.50 usec  
 TE 294.8 K  
 D1 1.00000000 sec  
 TDO 1

===== CHANNEL f1 =====  
 NUC1 1H  
 P1 13.80 usec  
 PL1 -2.00 dB  
 SFO1 400.1324710 MHz

F2 - Processing parameters  
 SI 32768  
 SF 400.1300011 MHz  
 WDN EM  
 SSB 0  
 LB 0.30 Hz  
 GB 0  
 PC 1.00

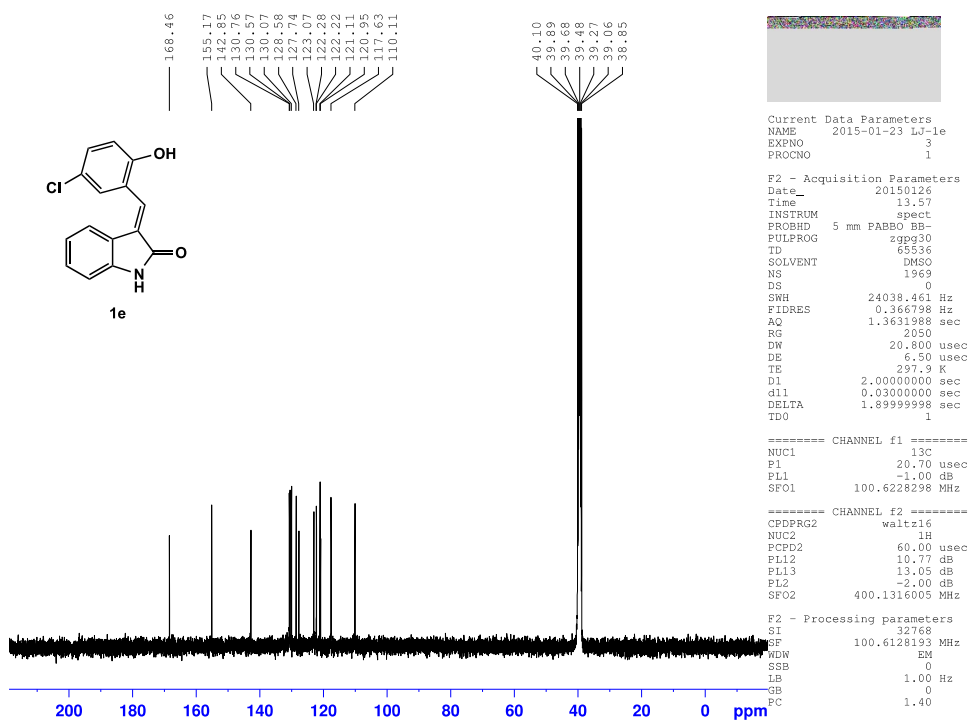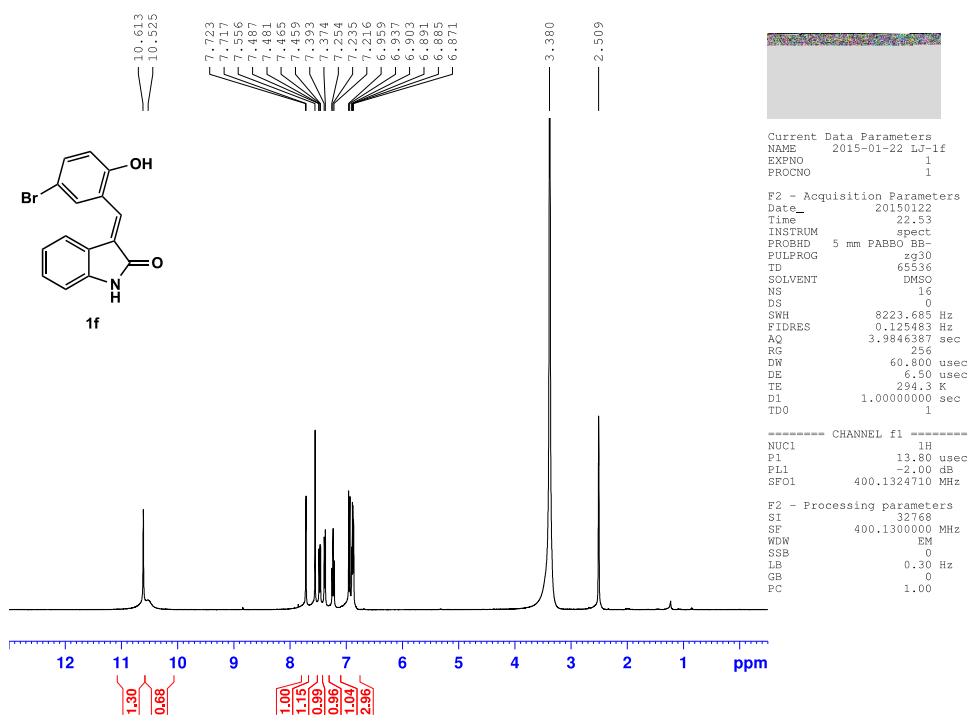

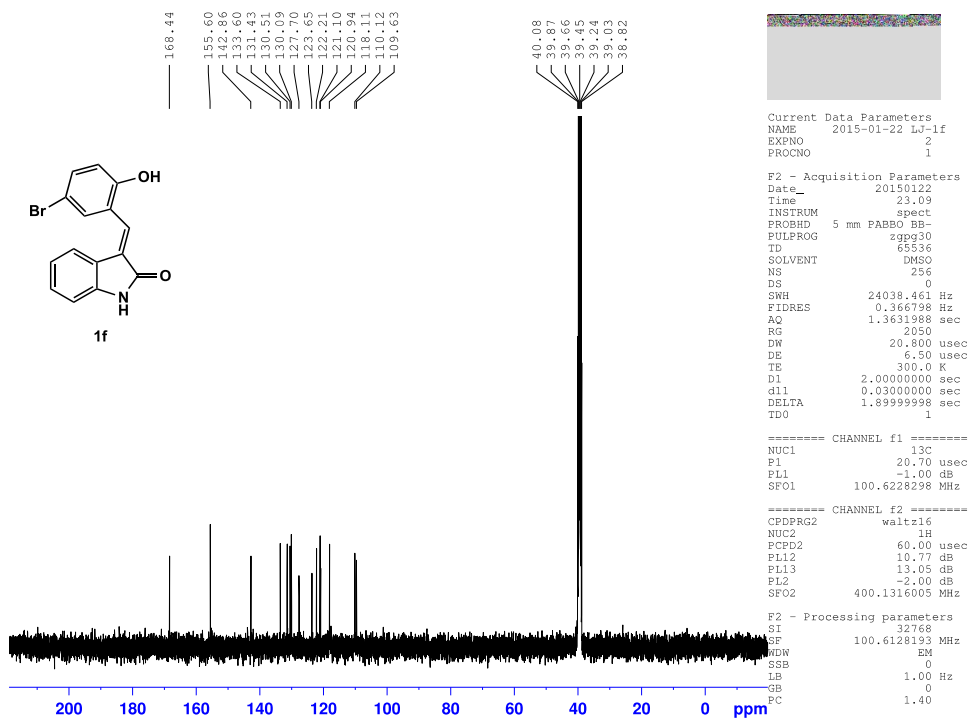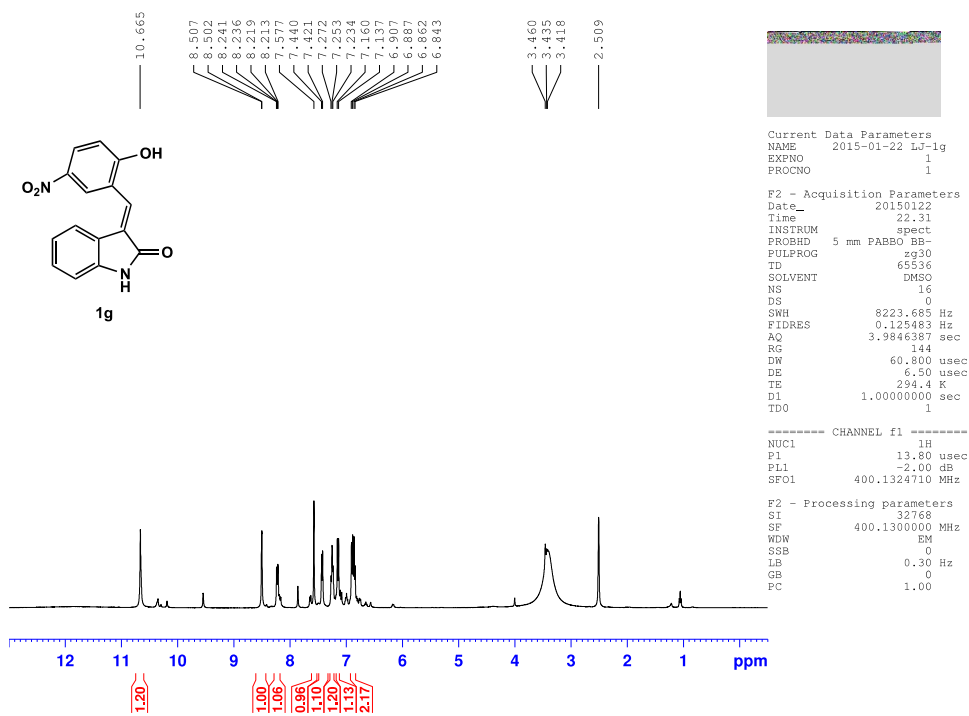

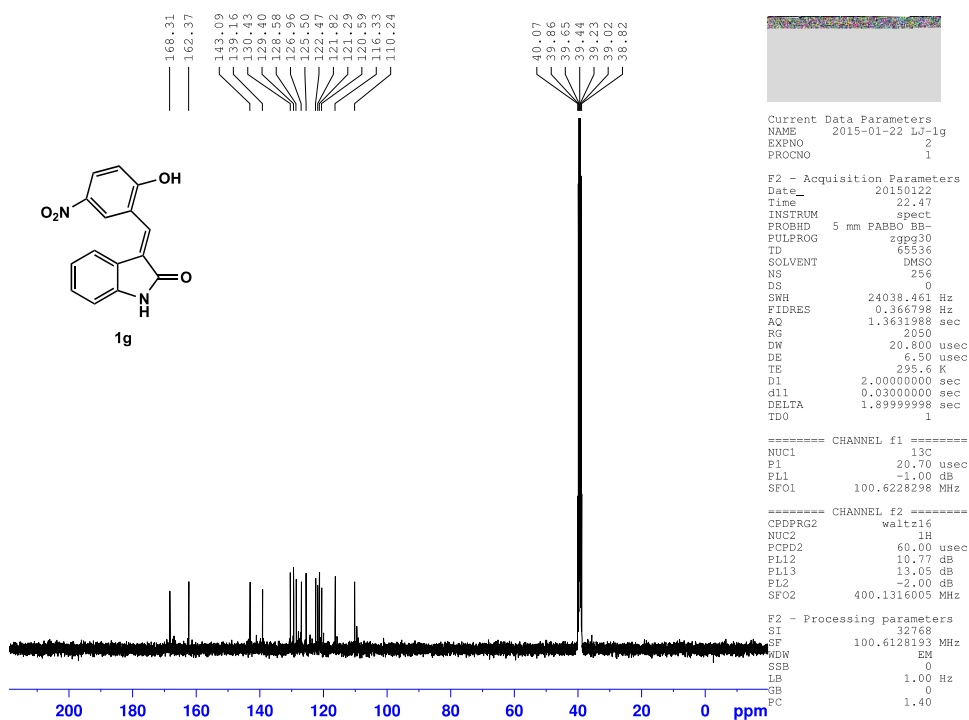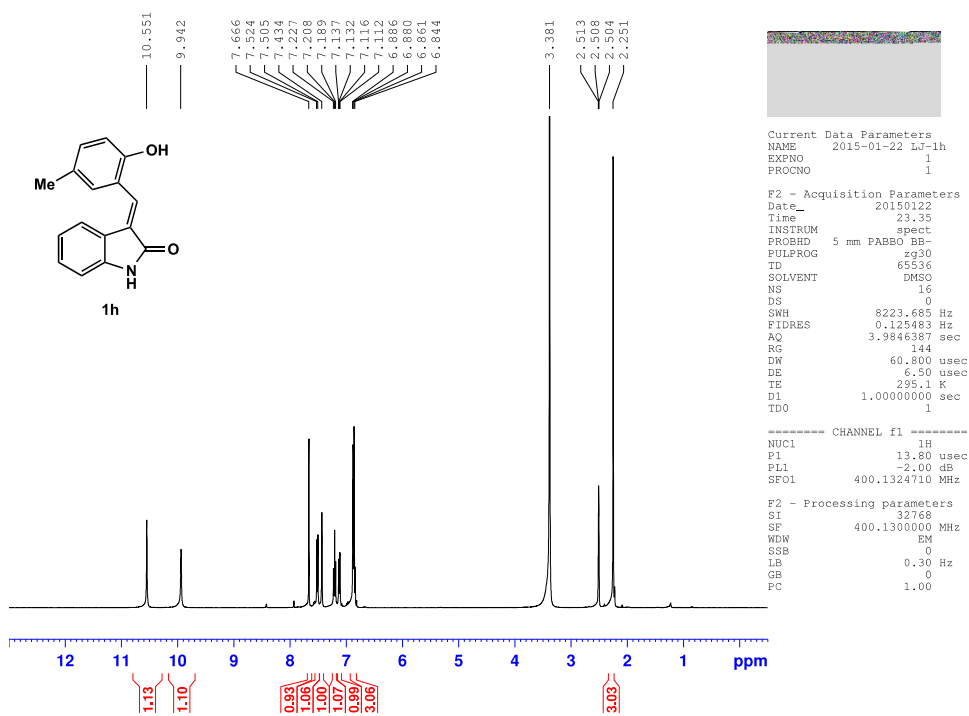

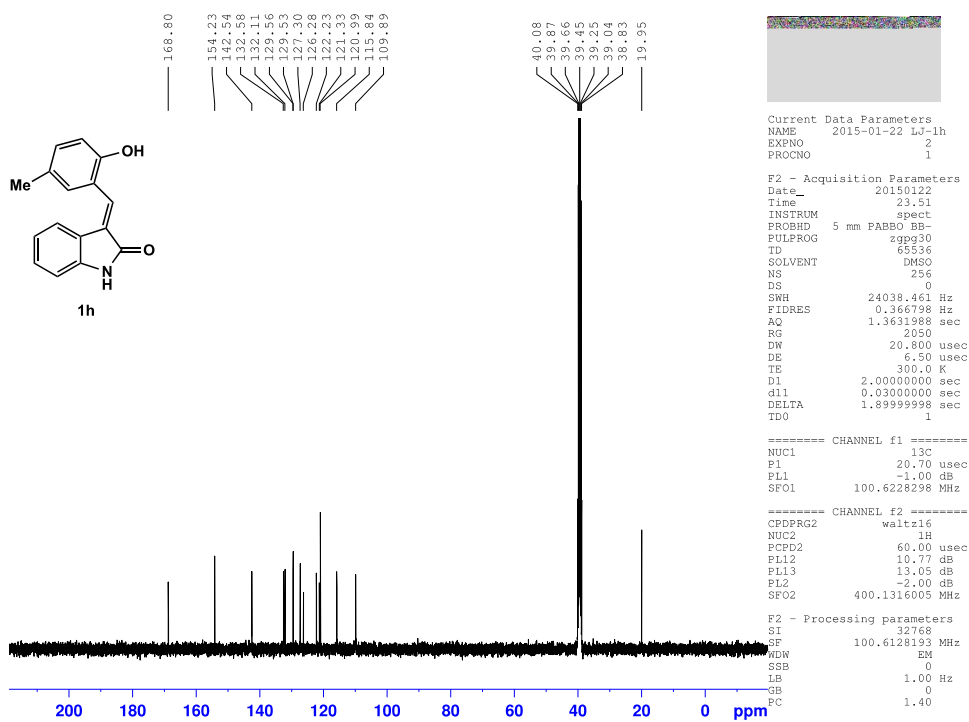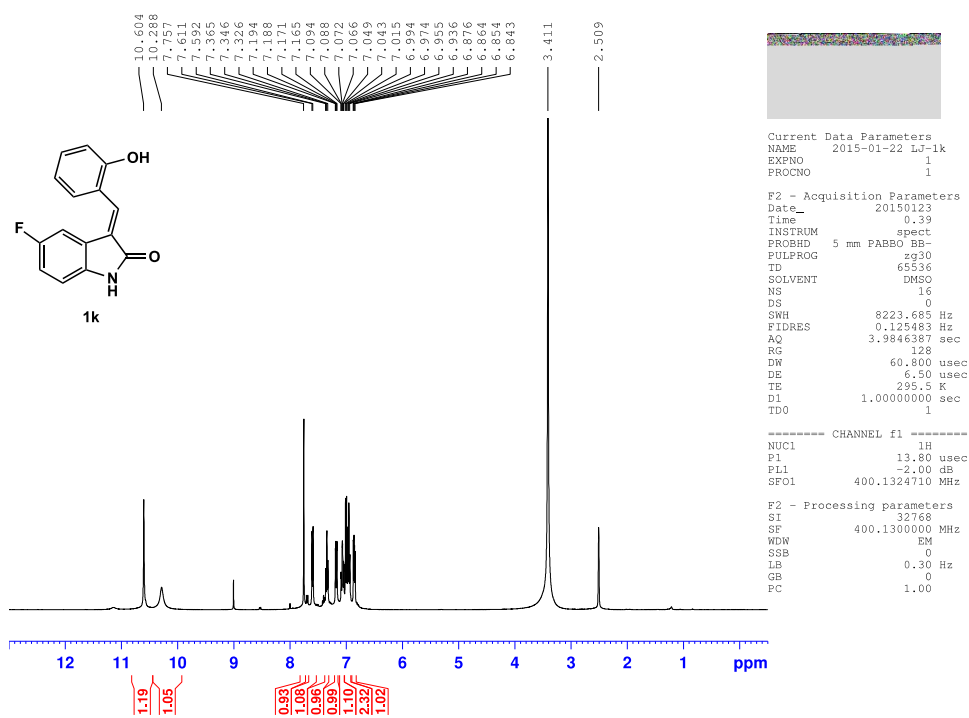

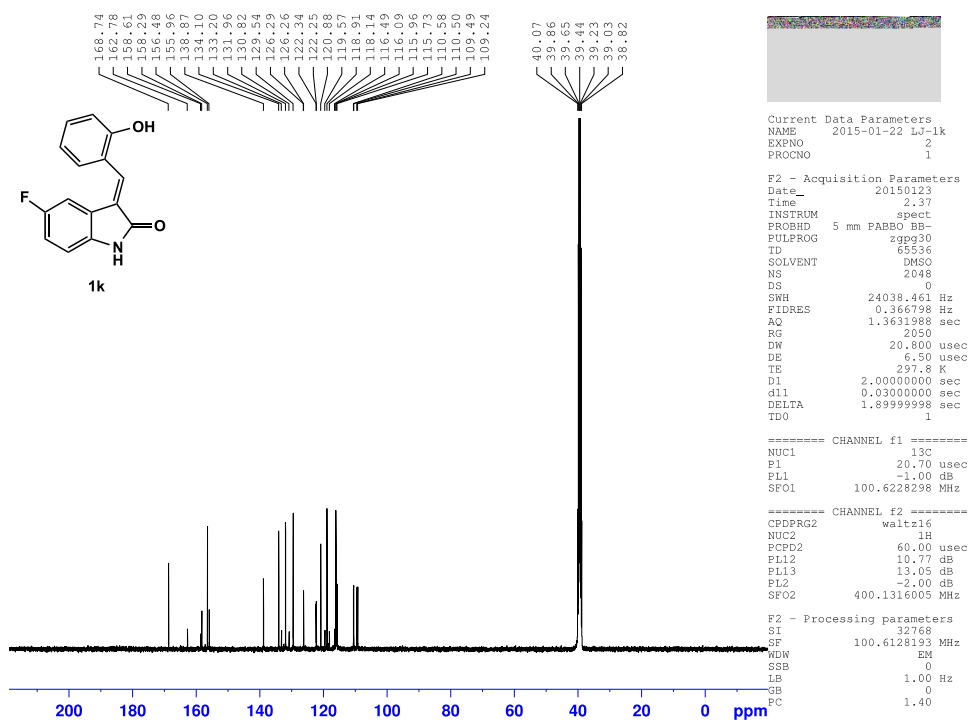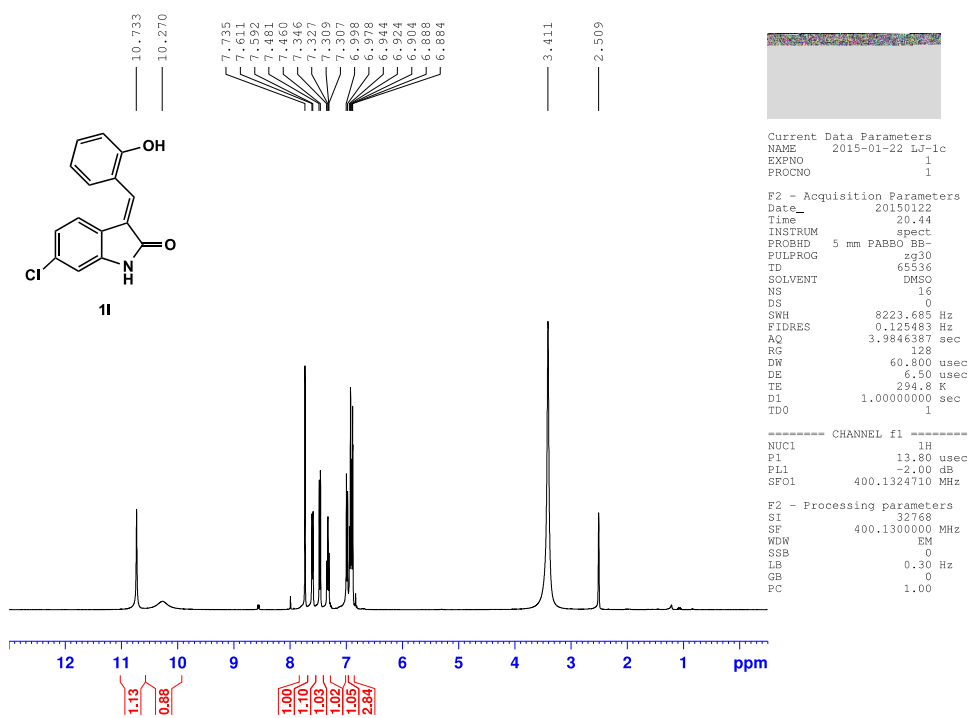

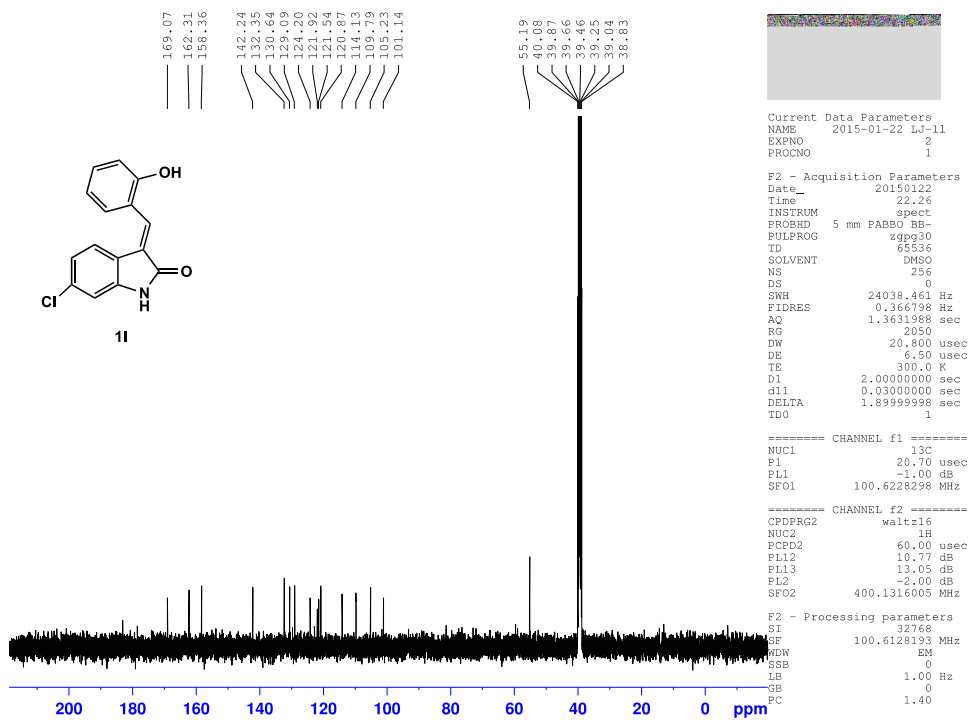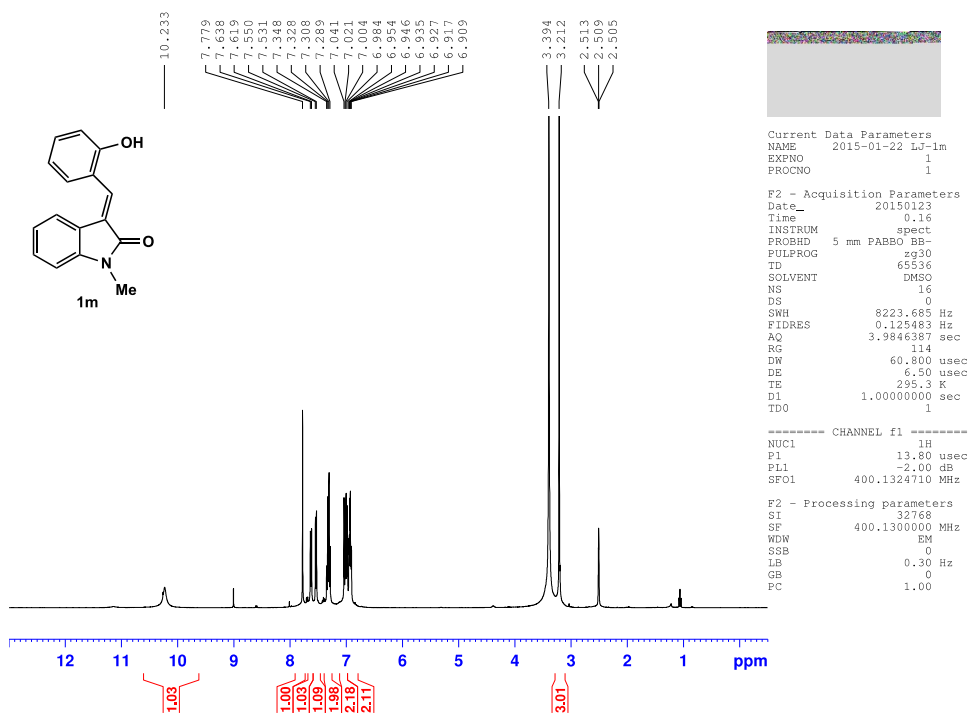



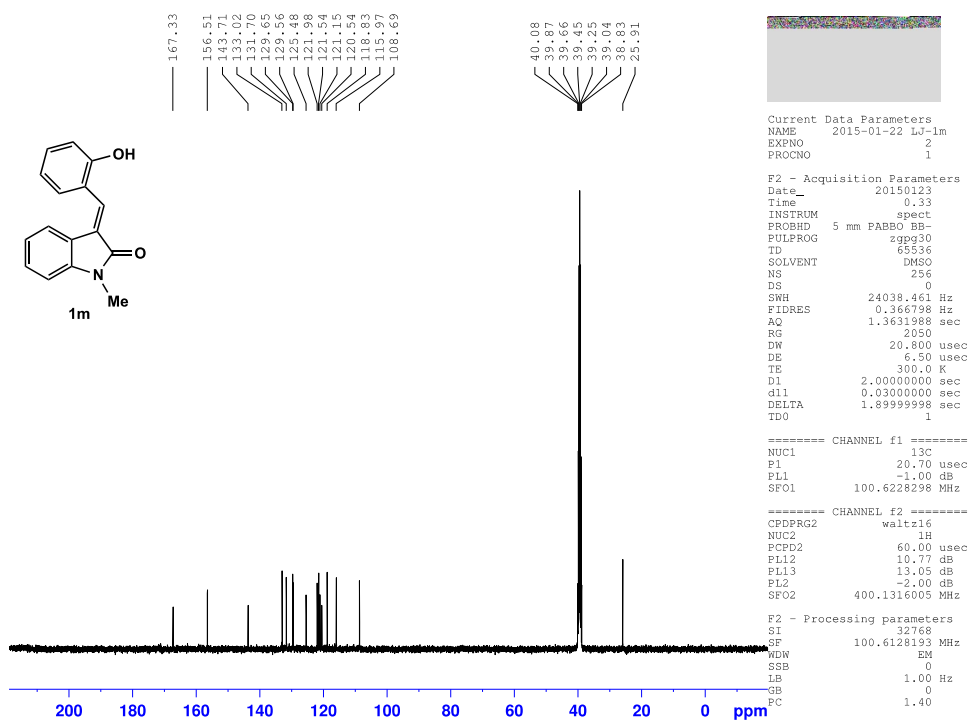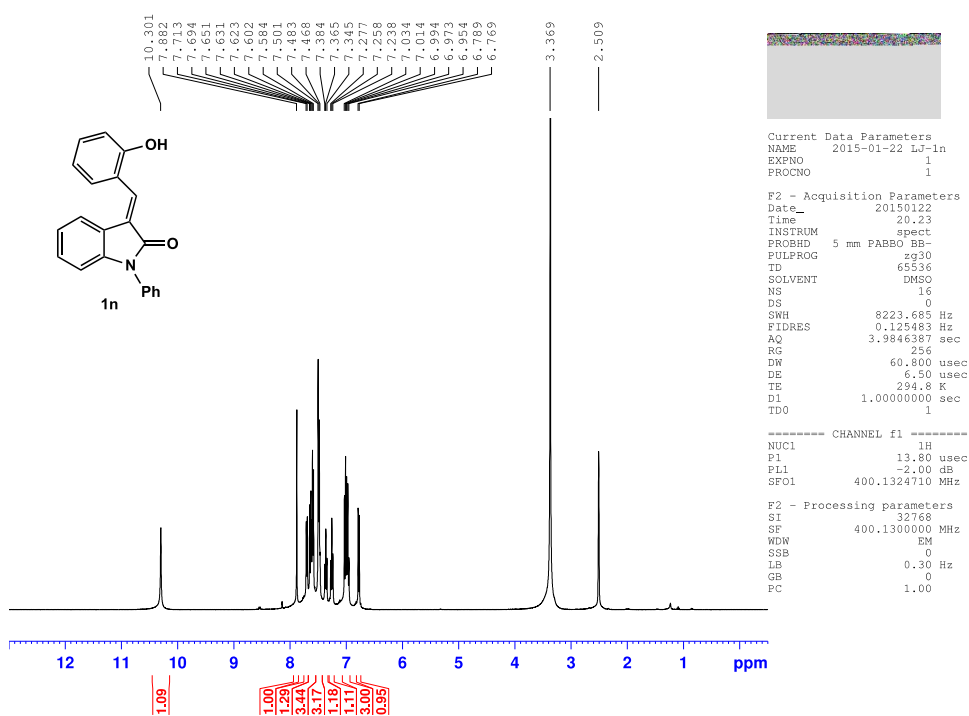

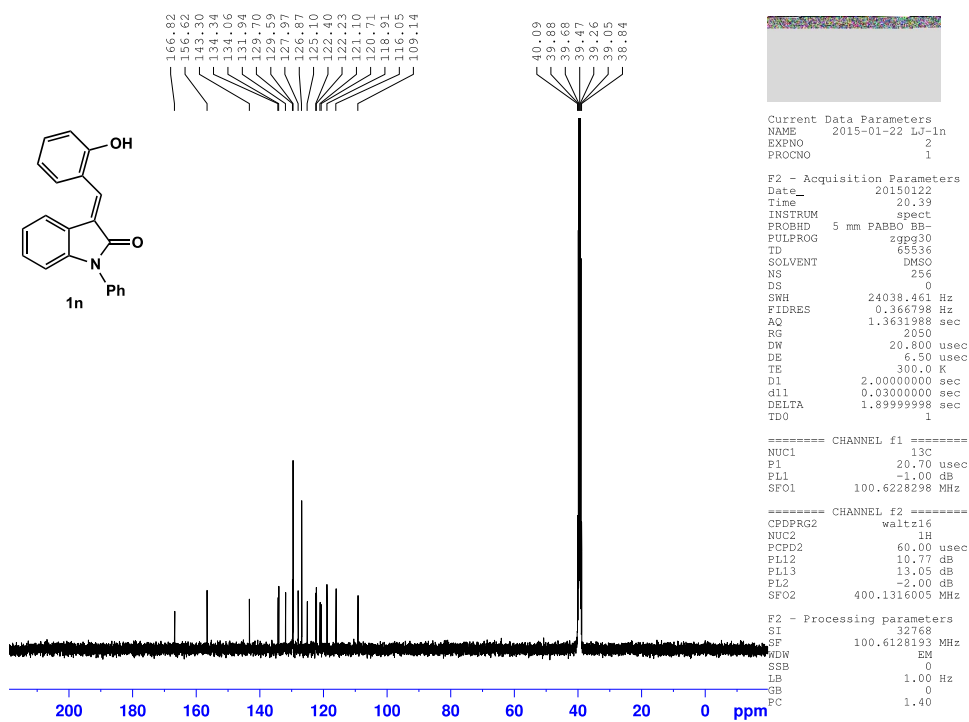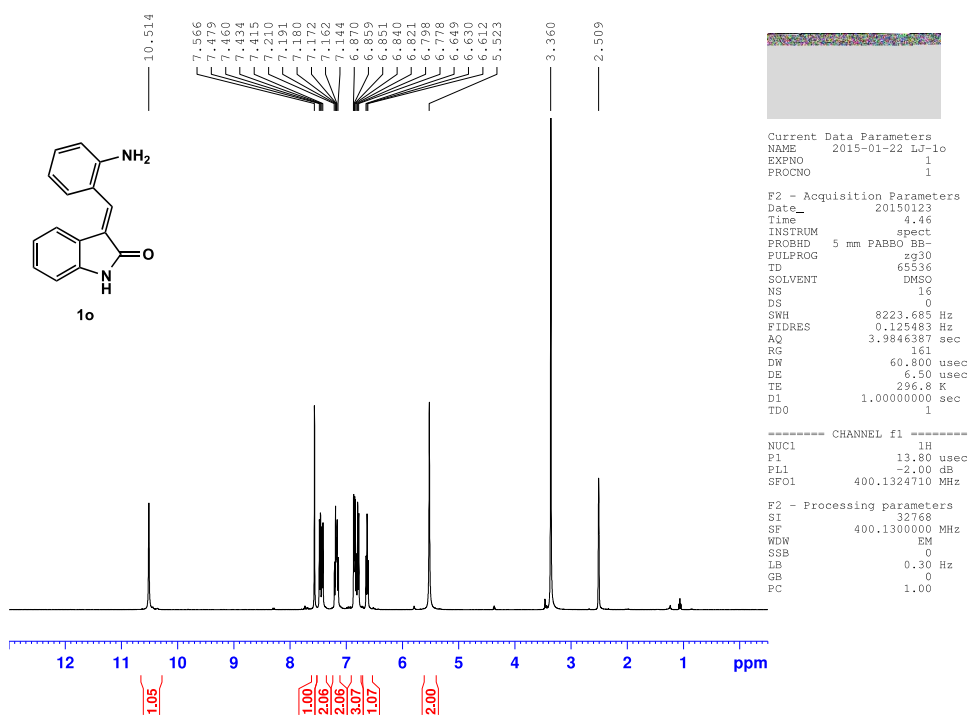

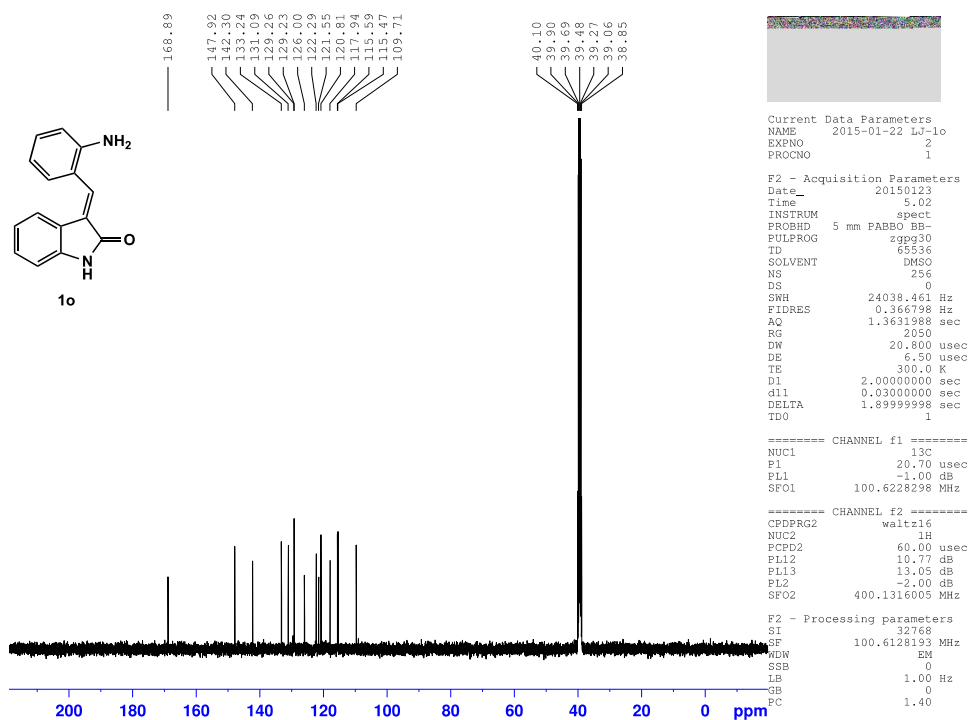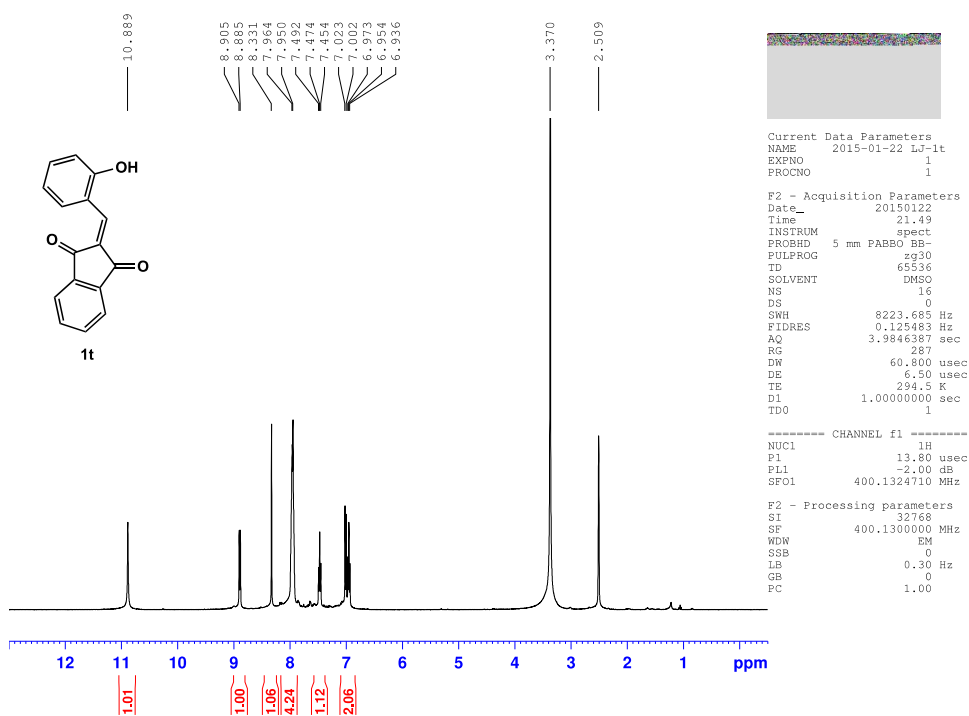

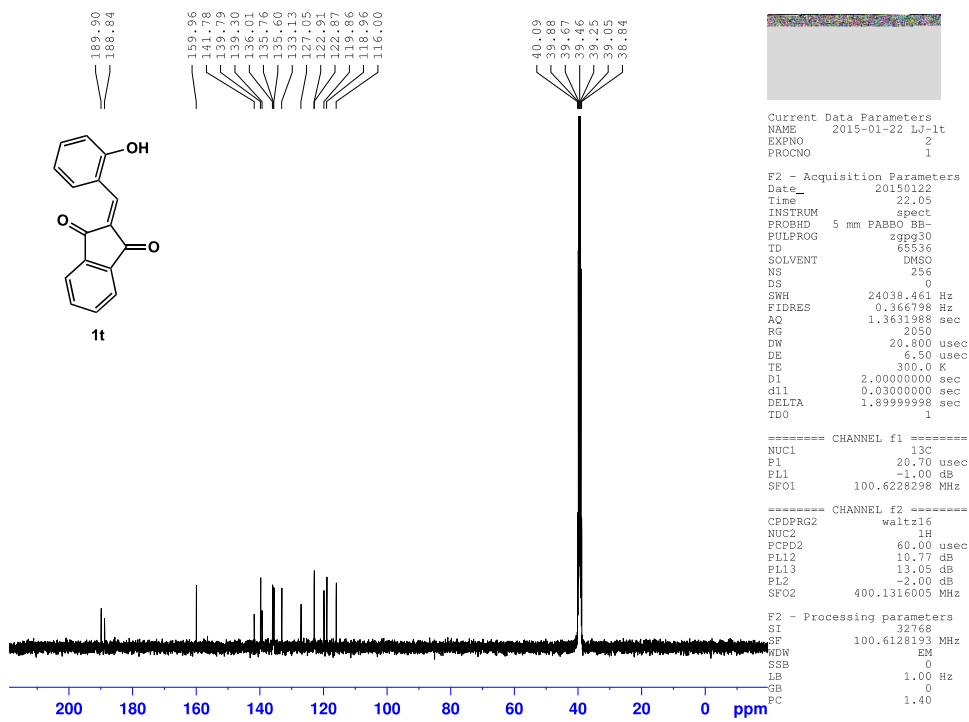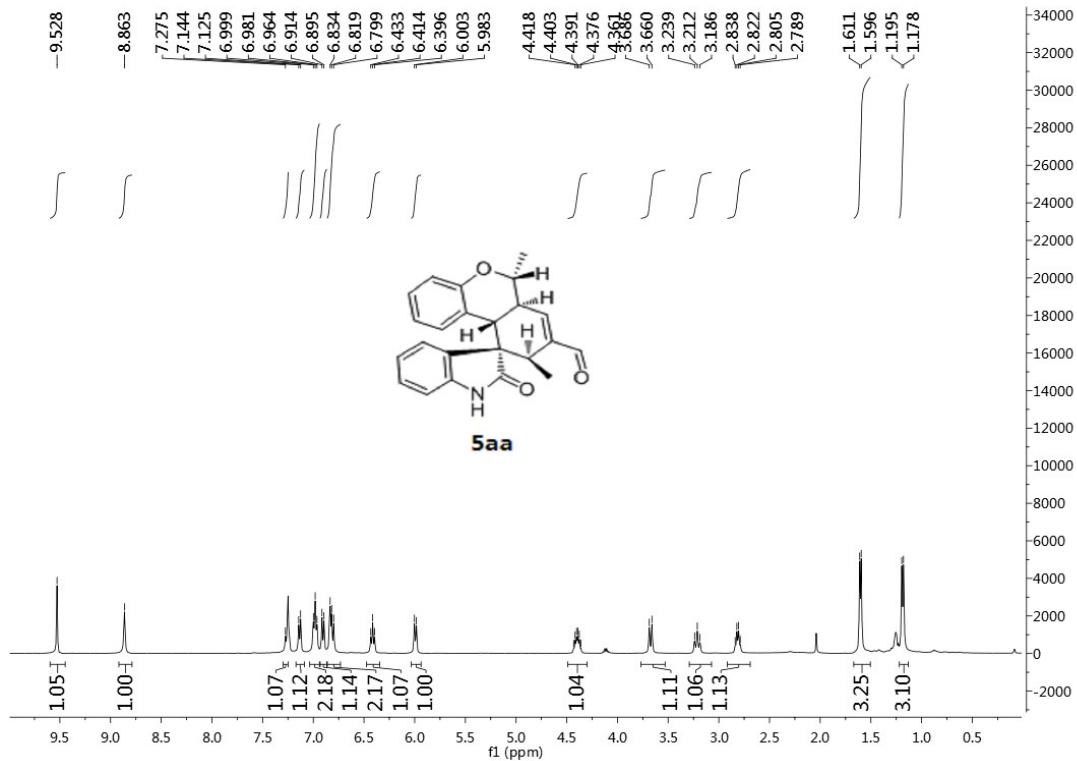

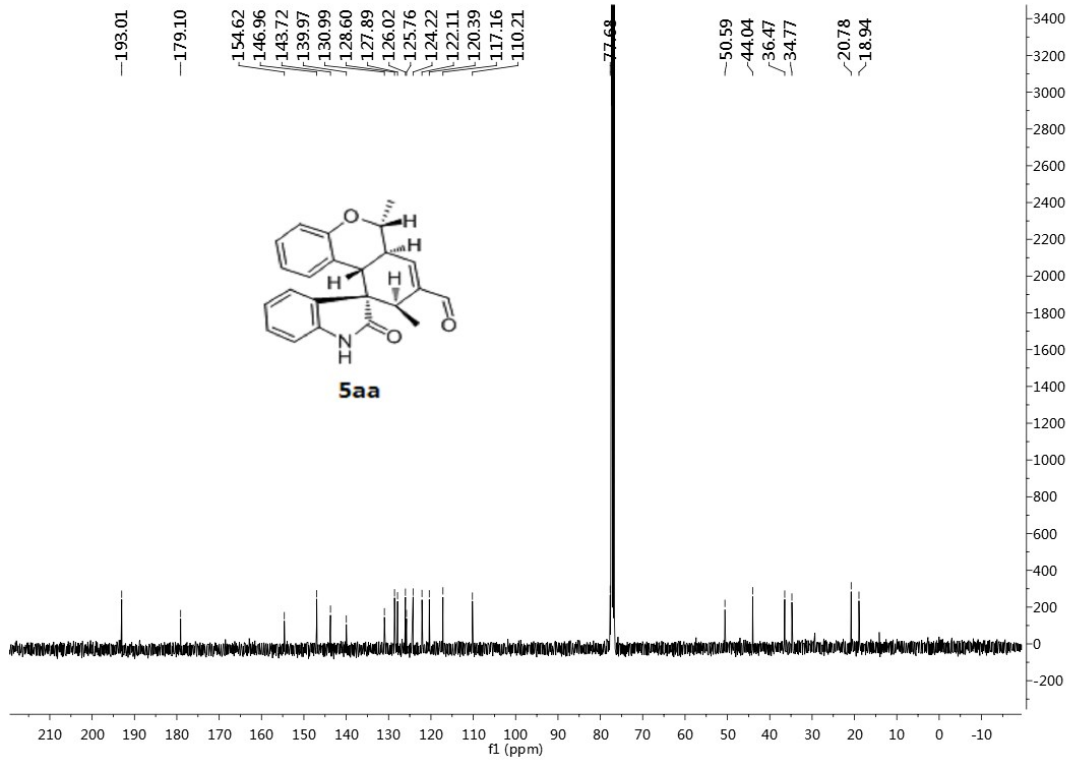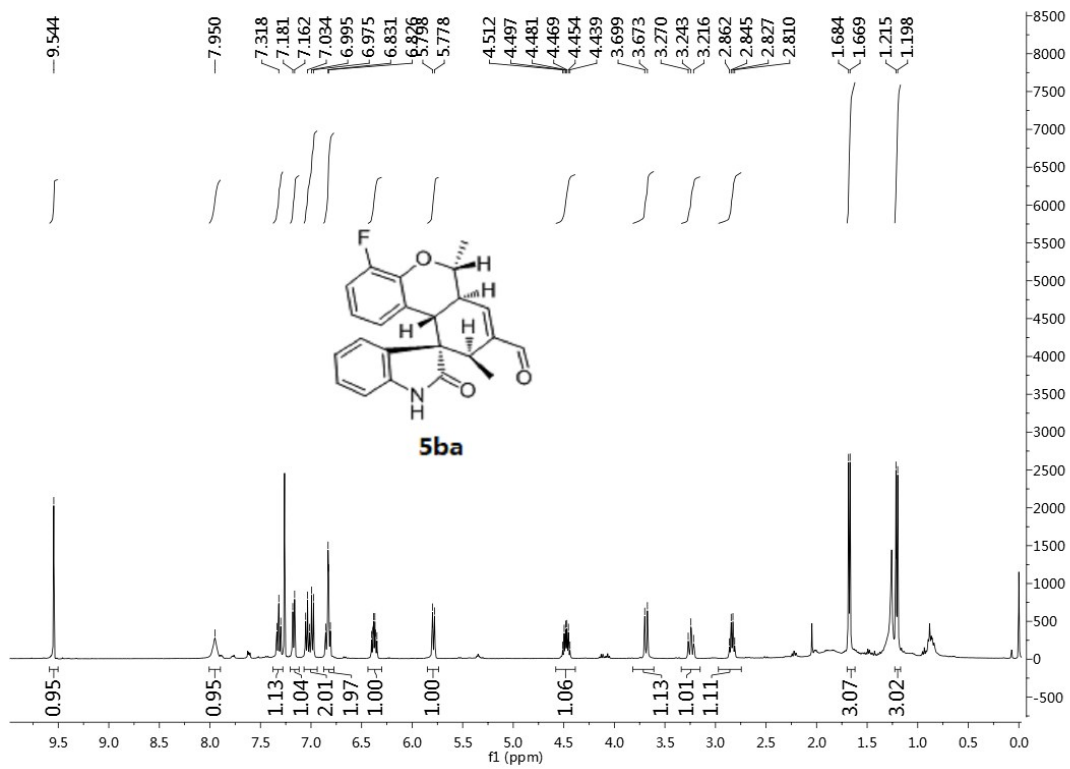

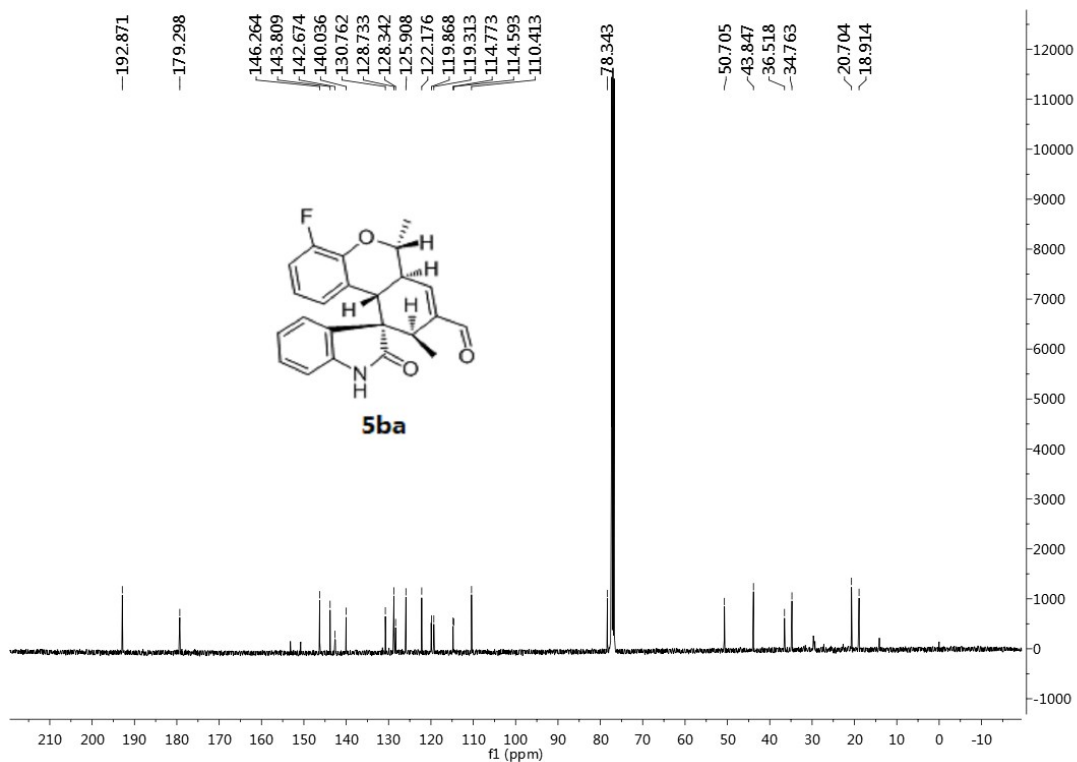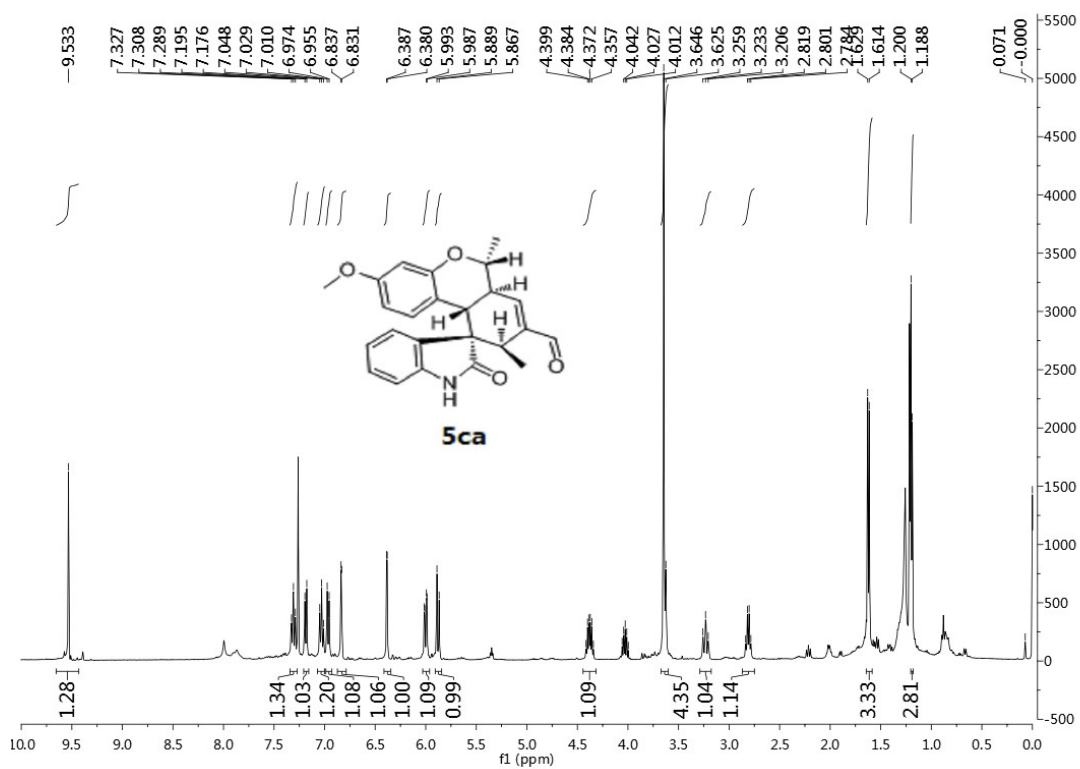

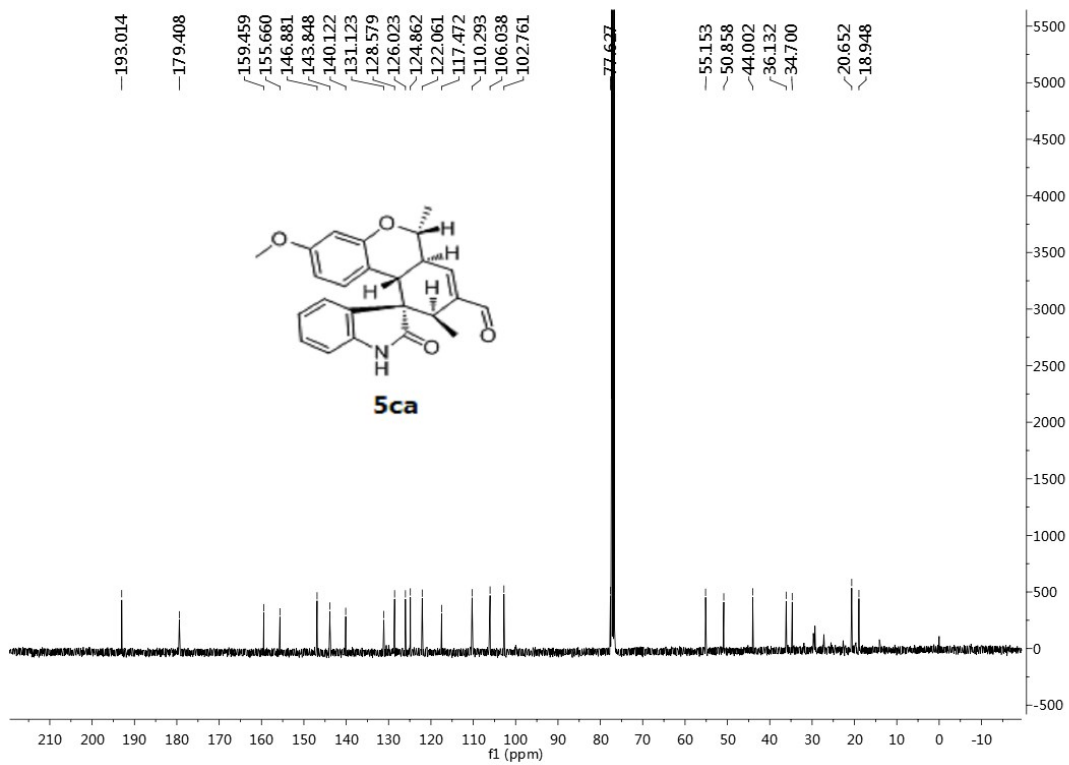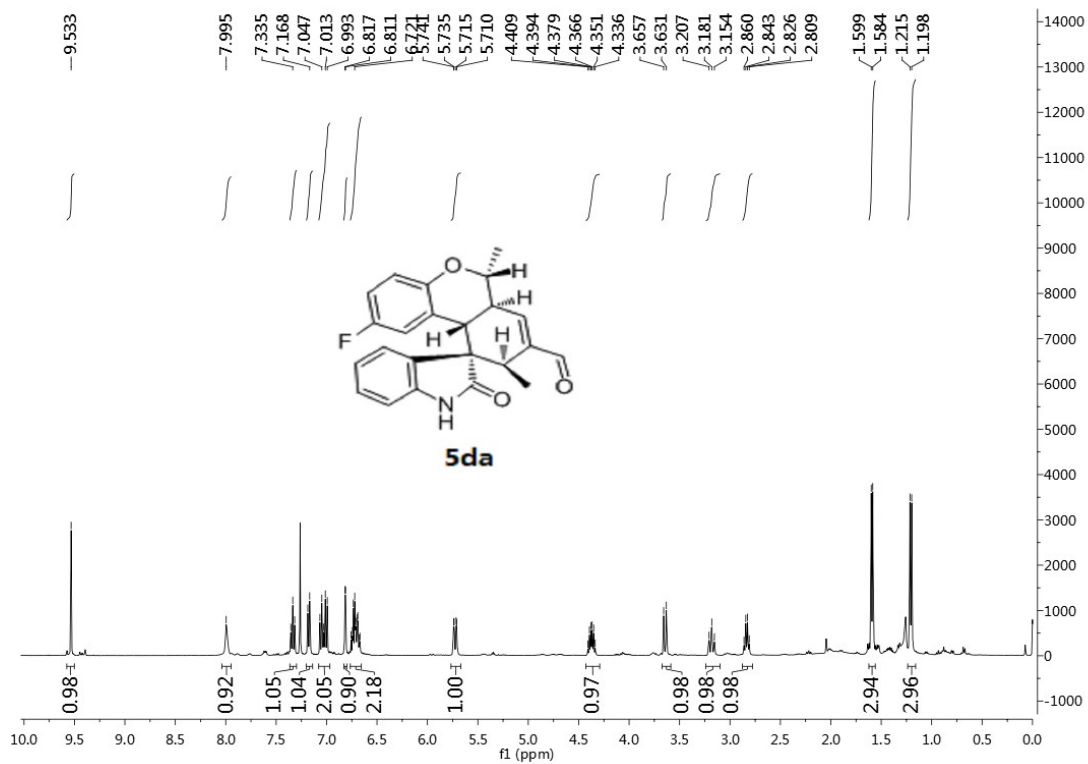

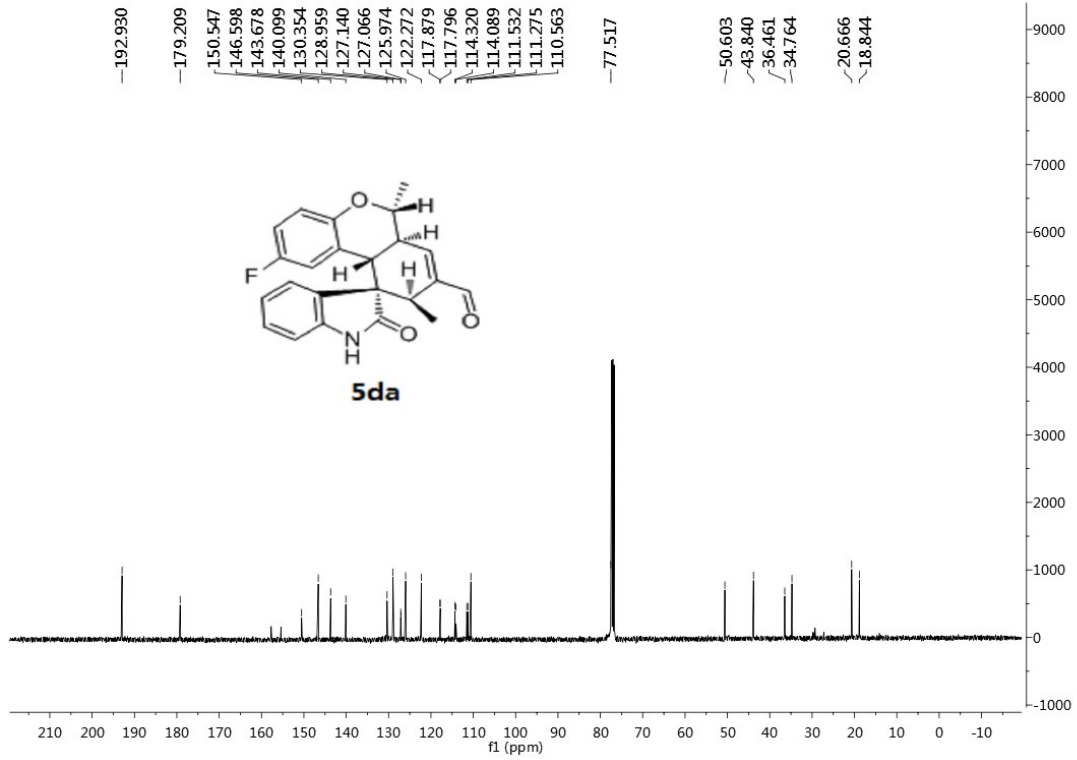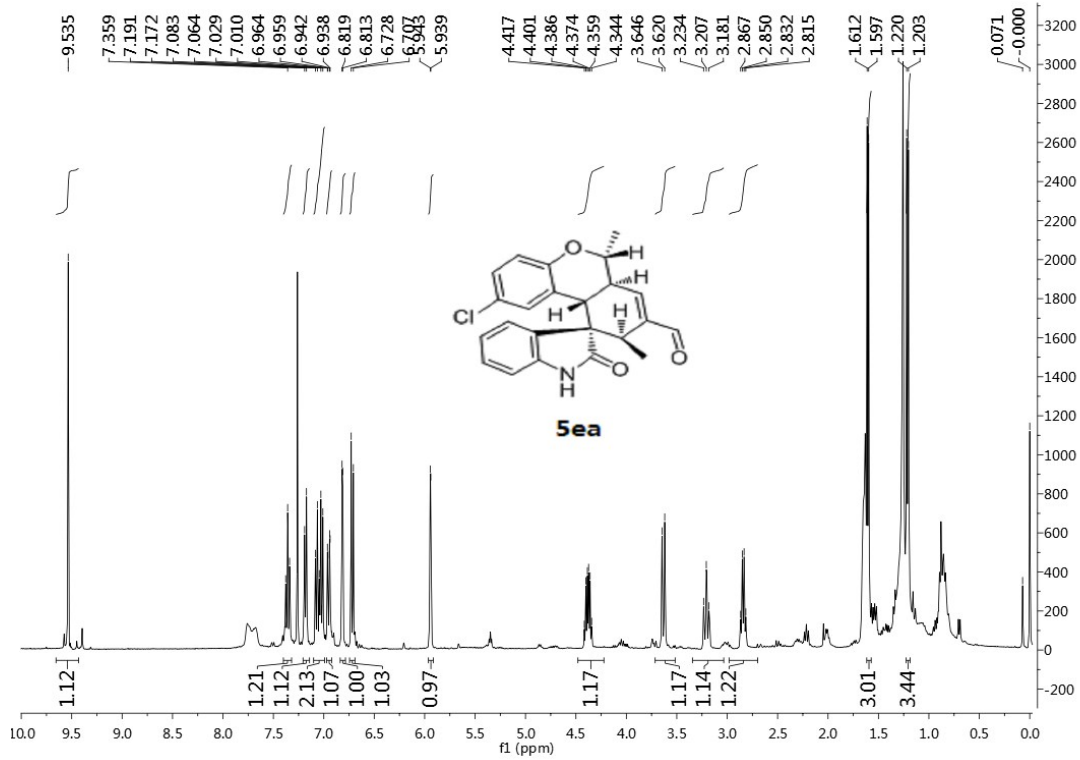



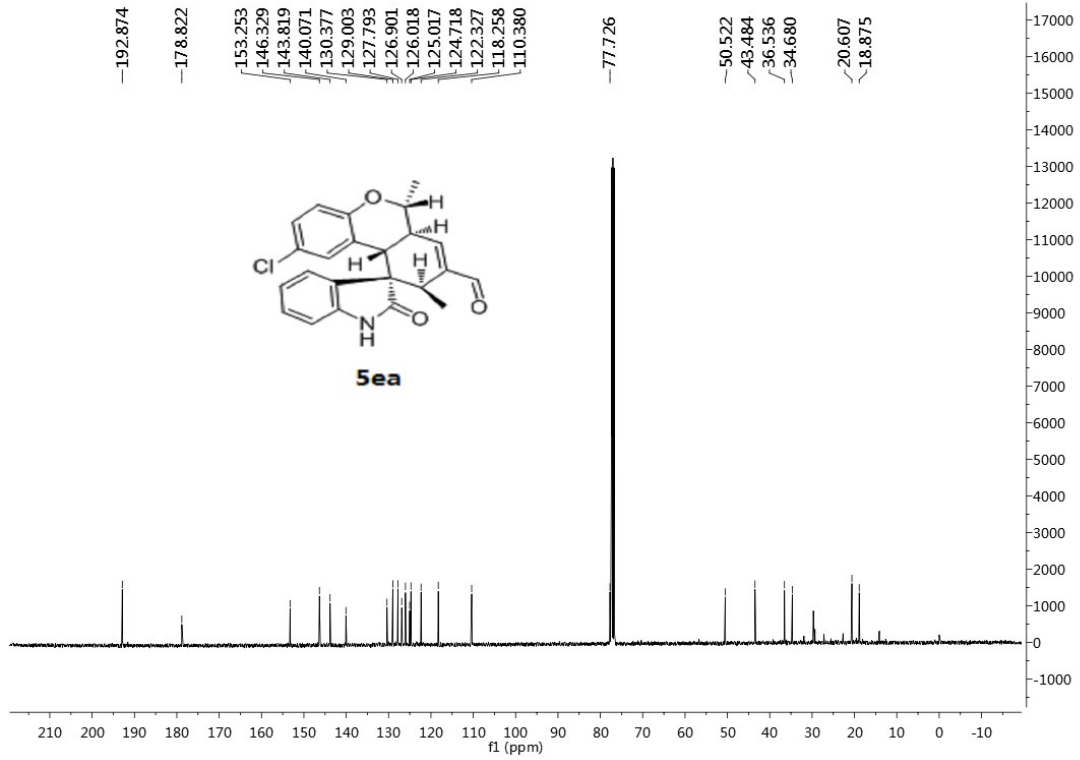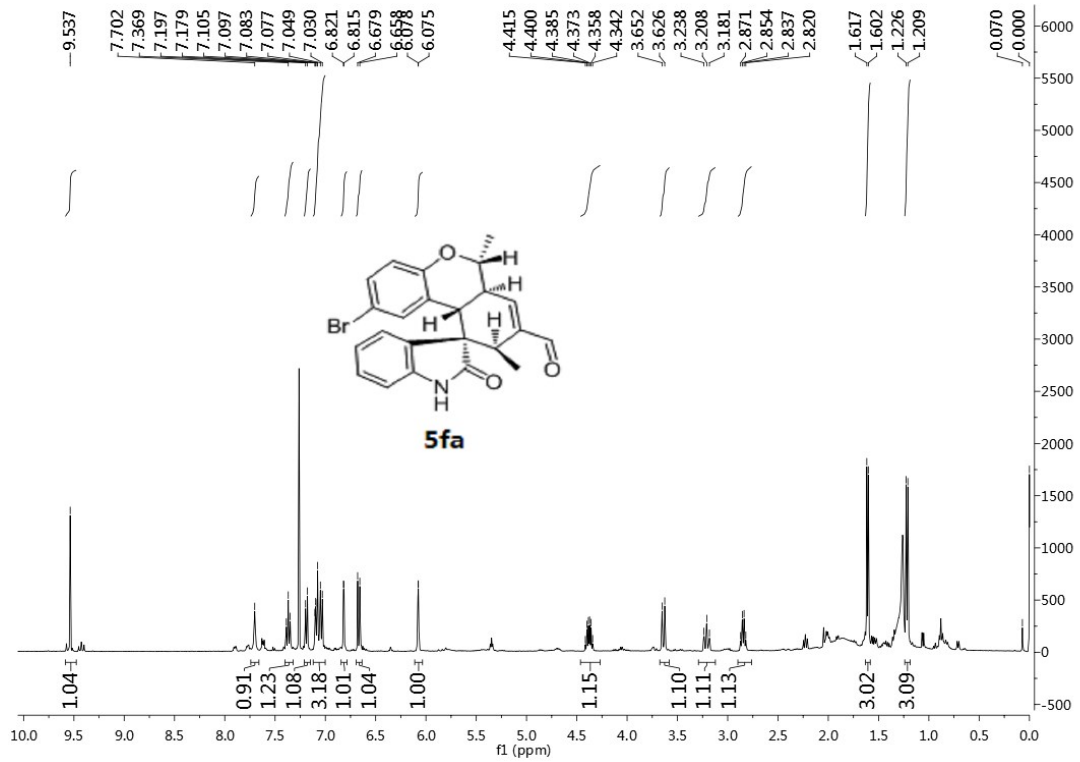

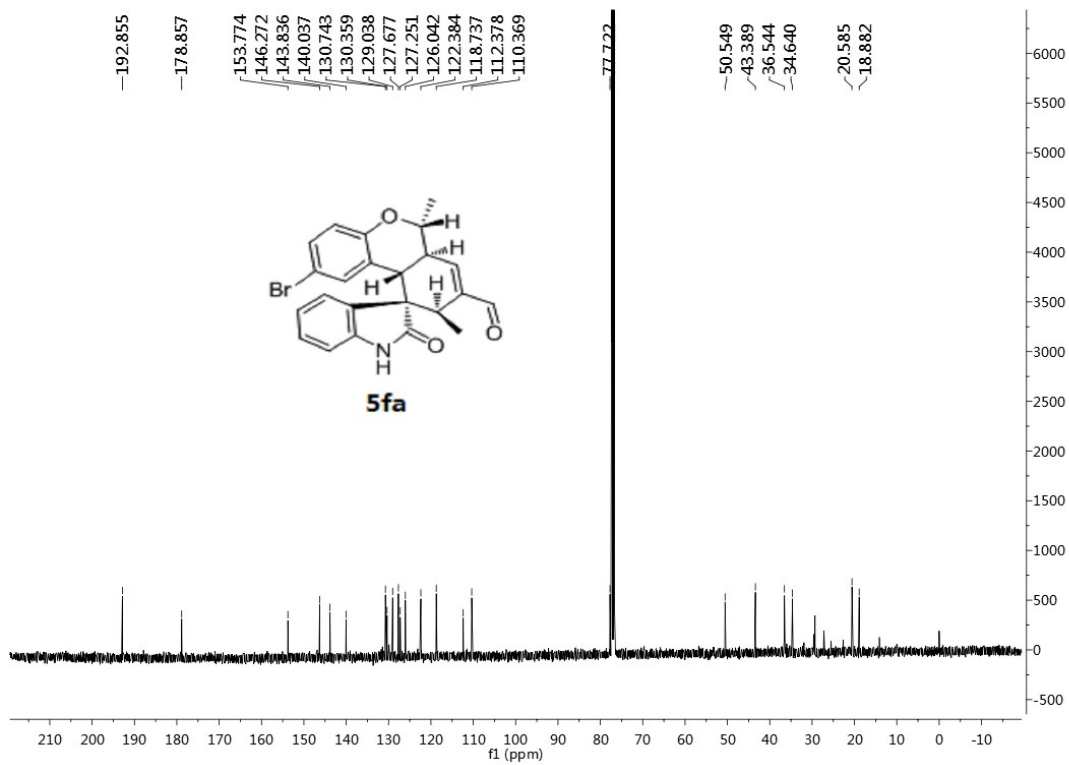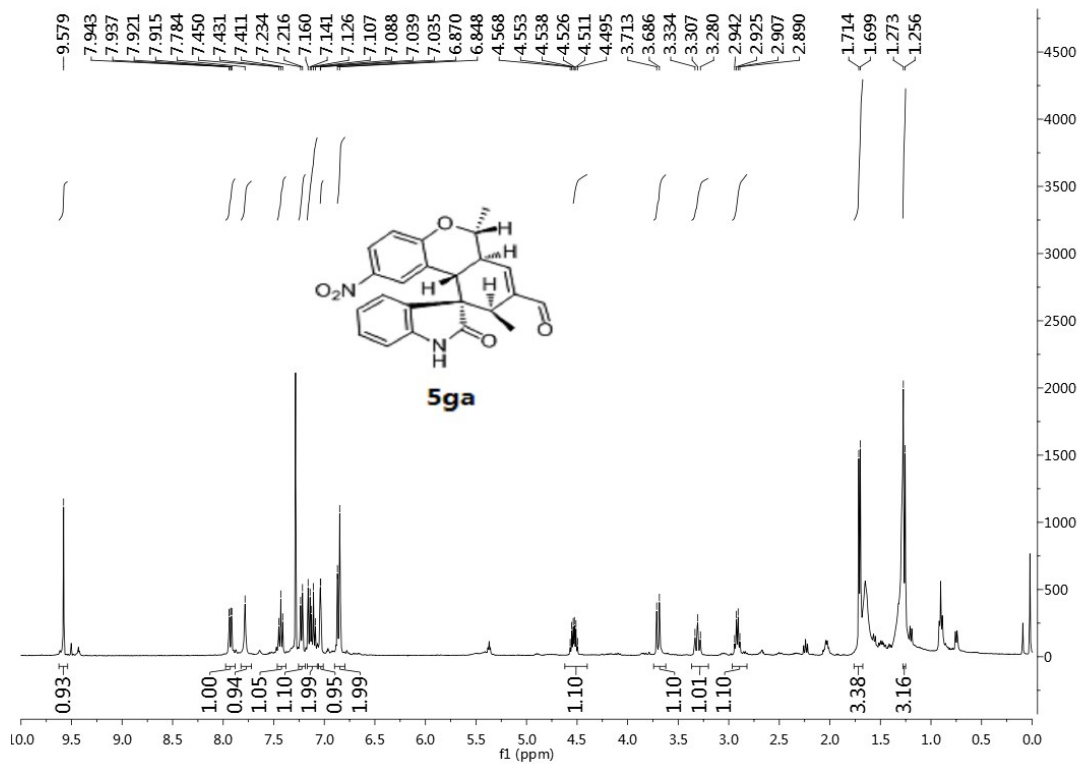

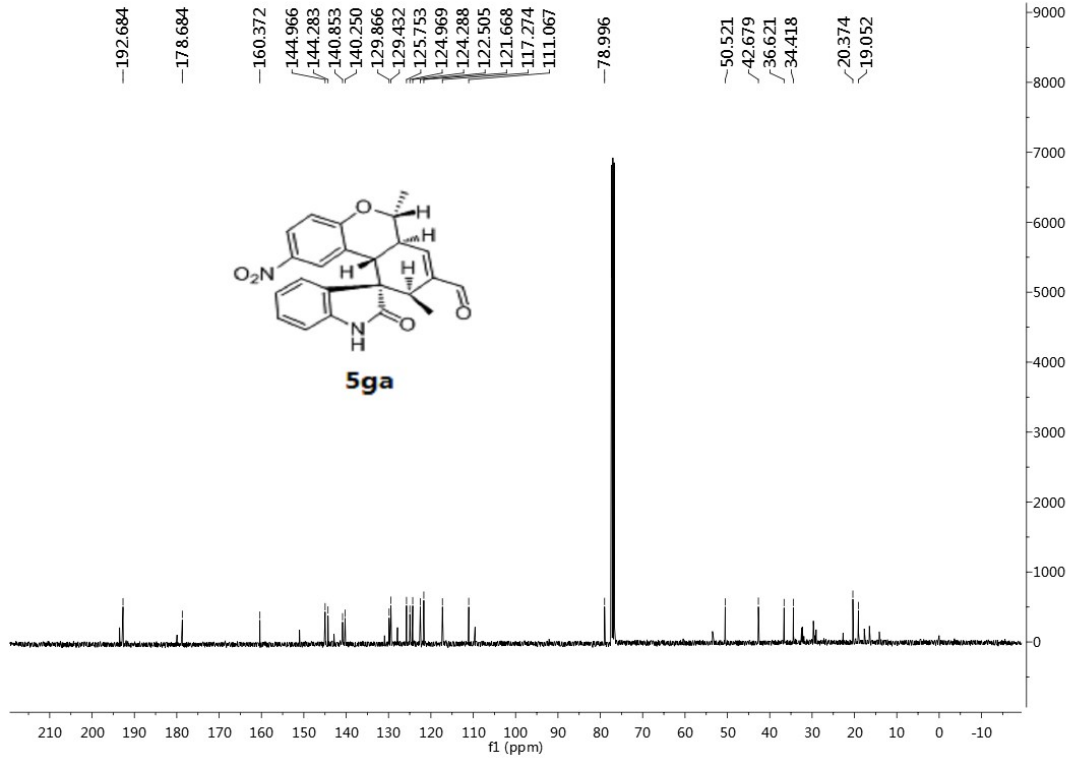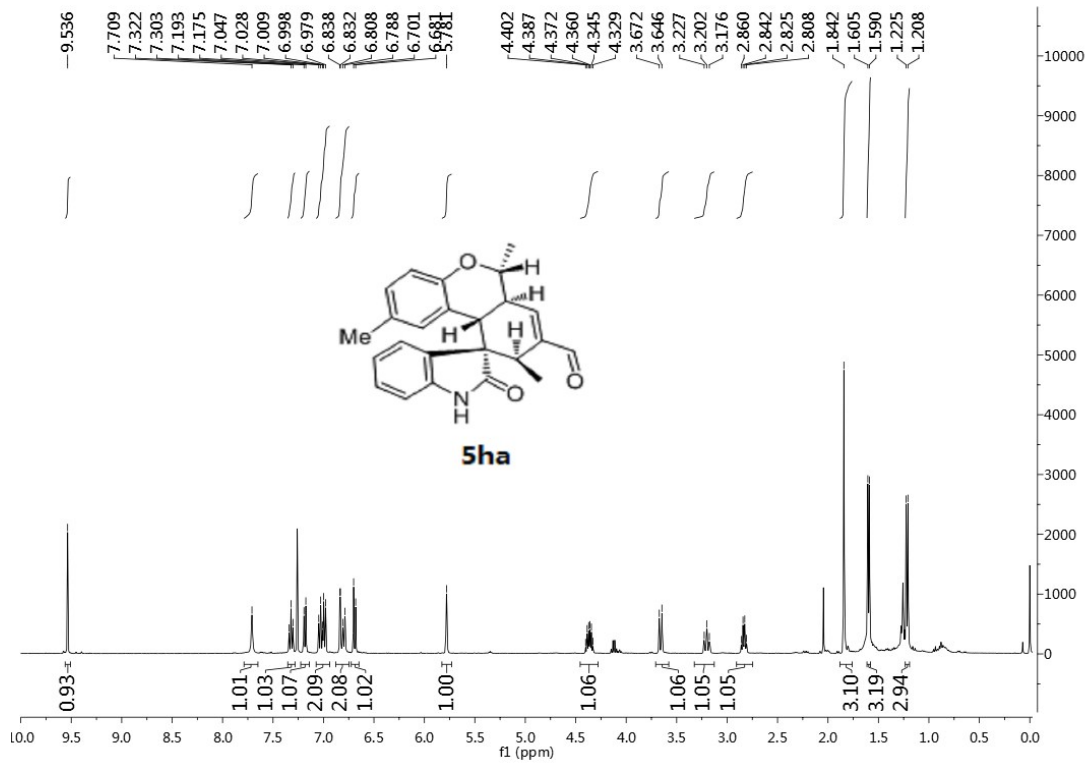

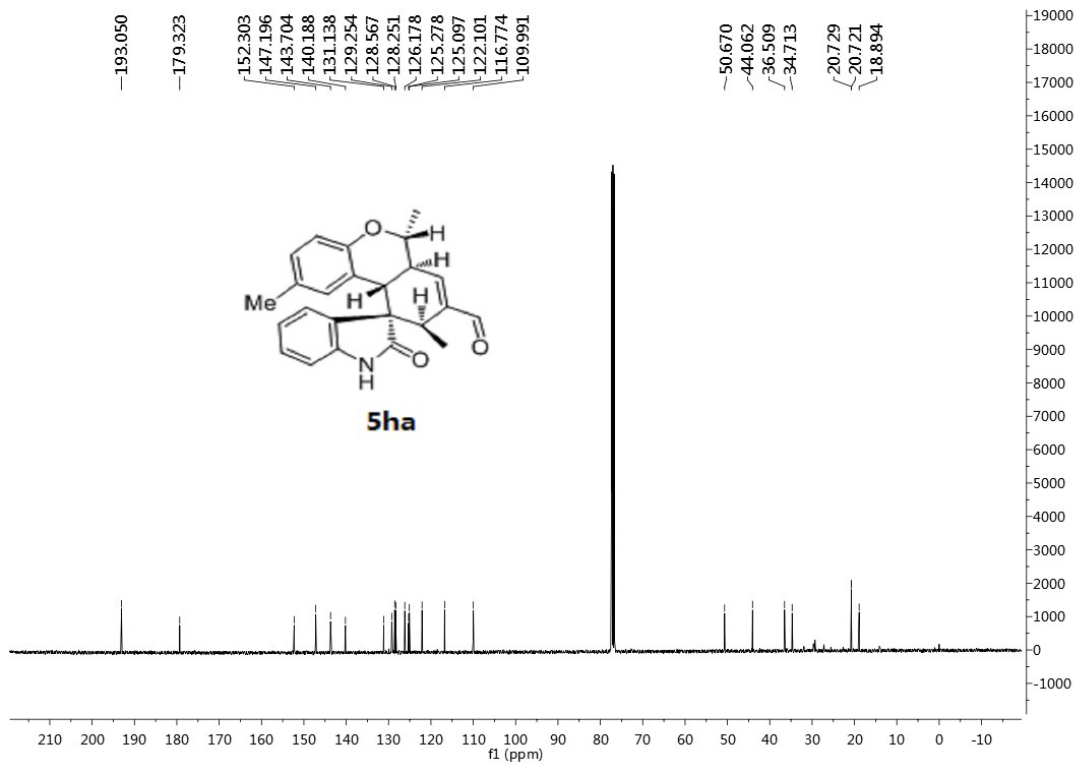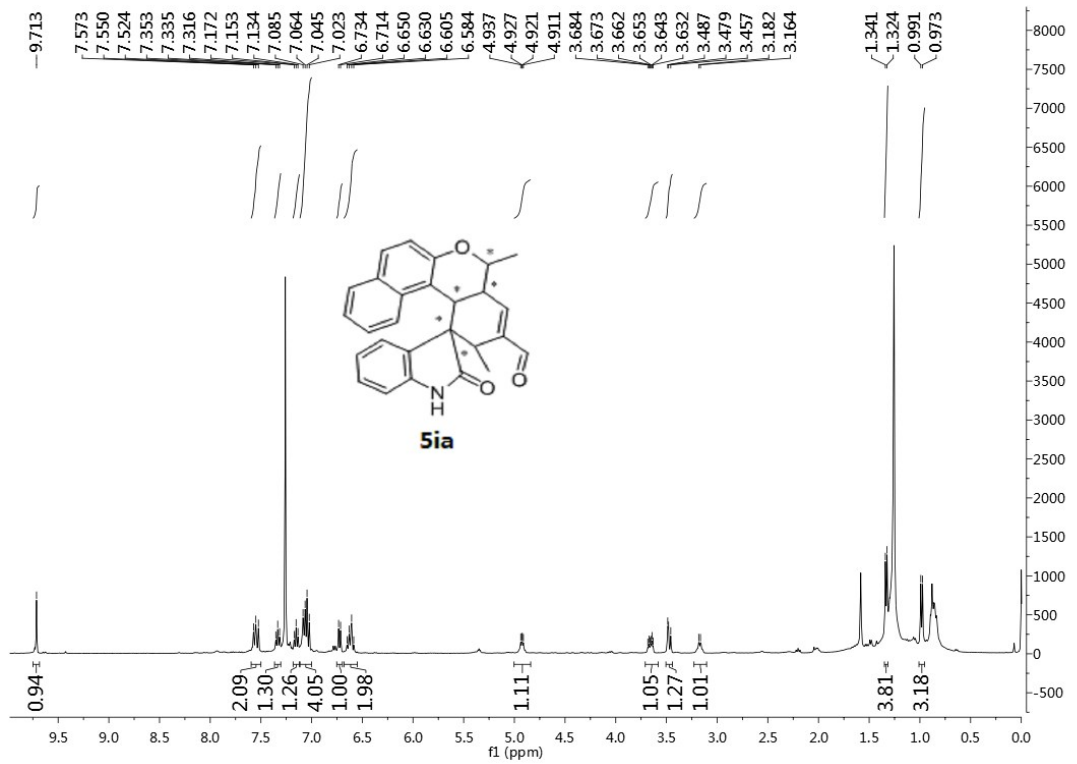

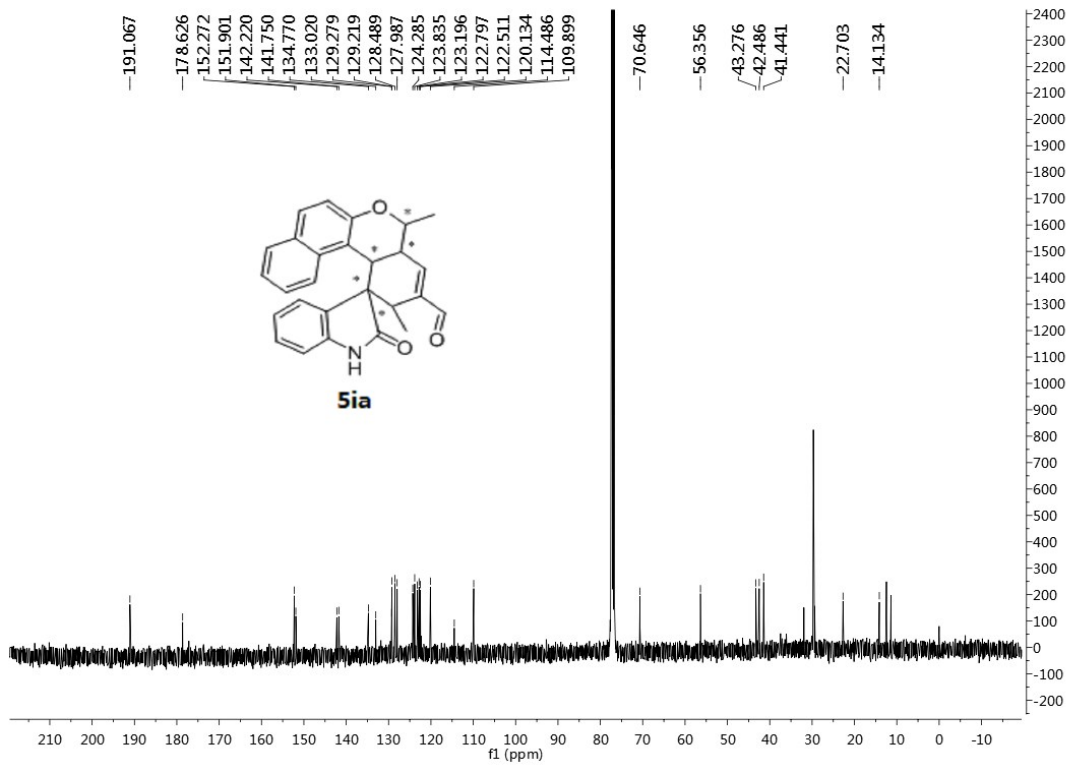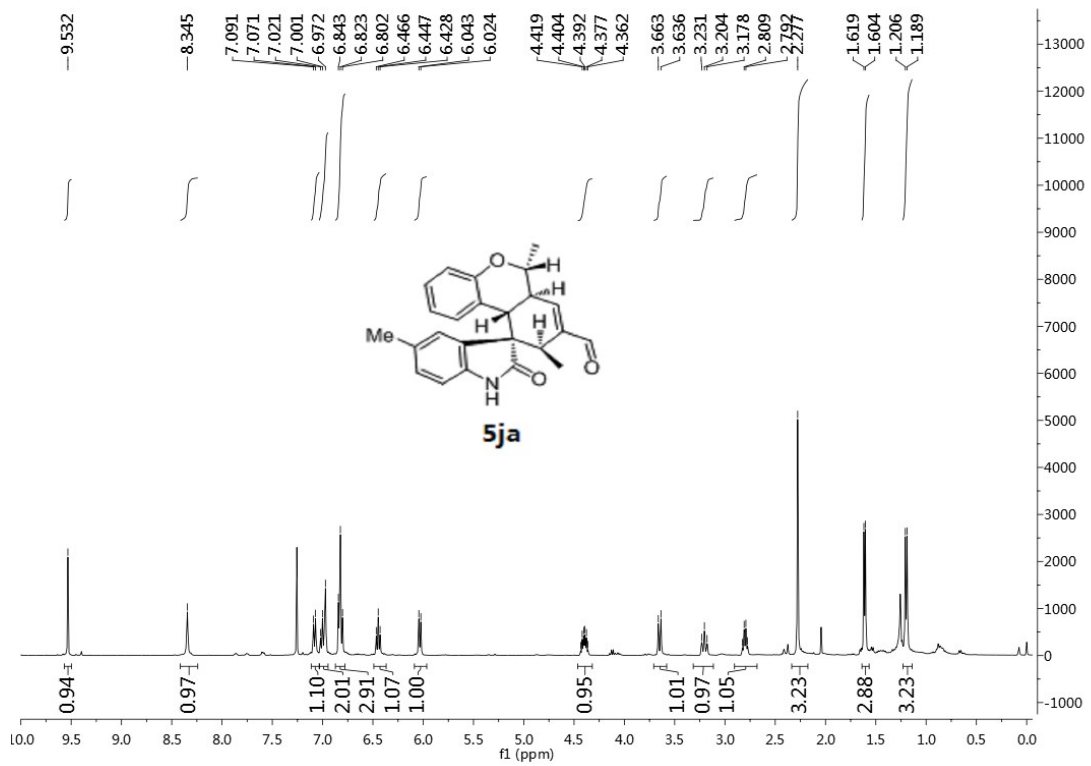

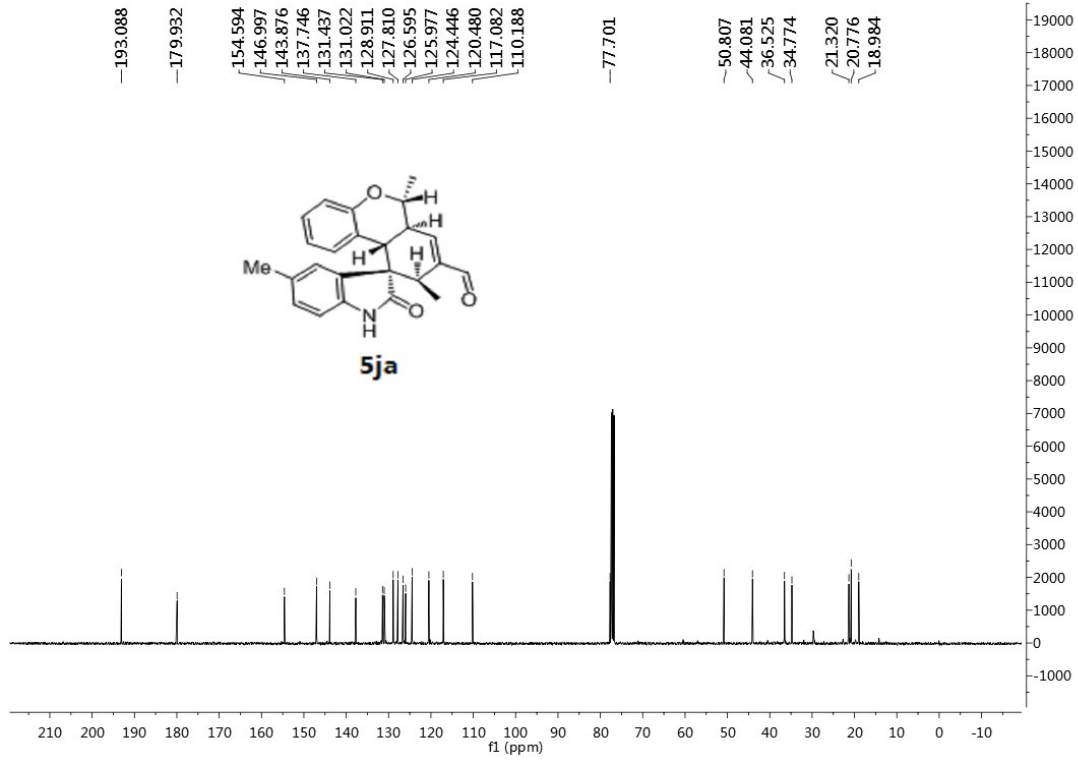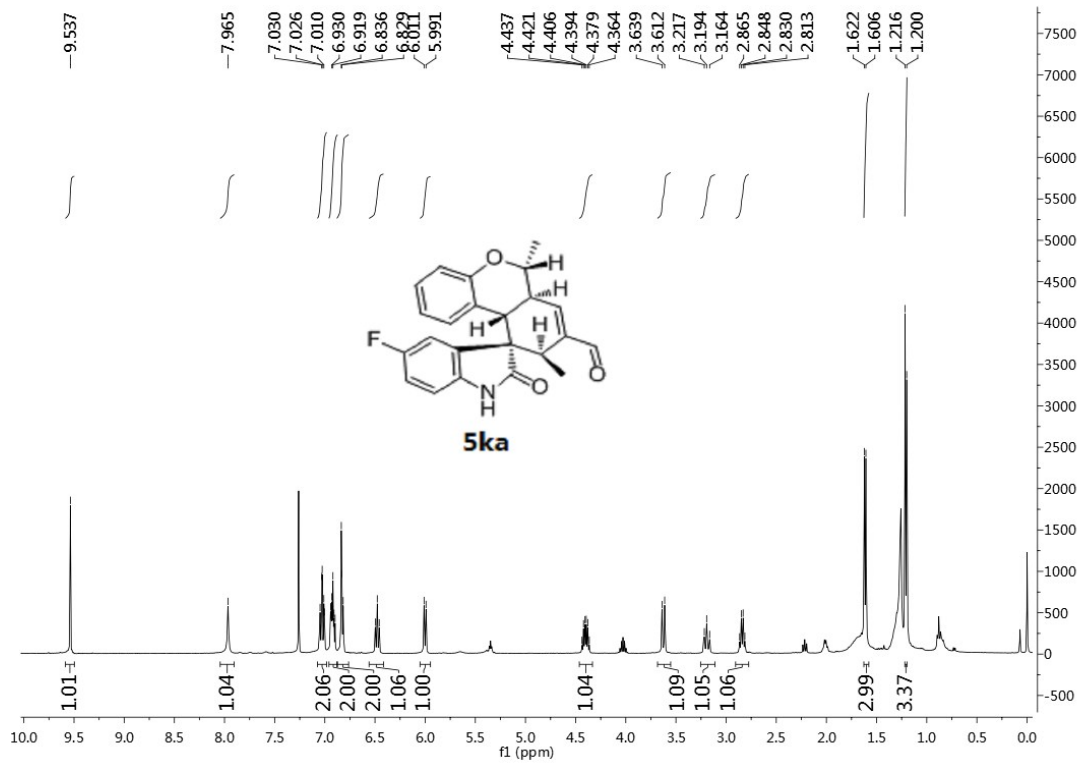

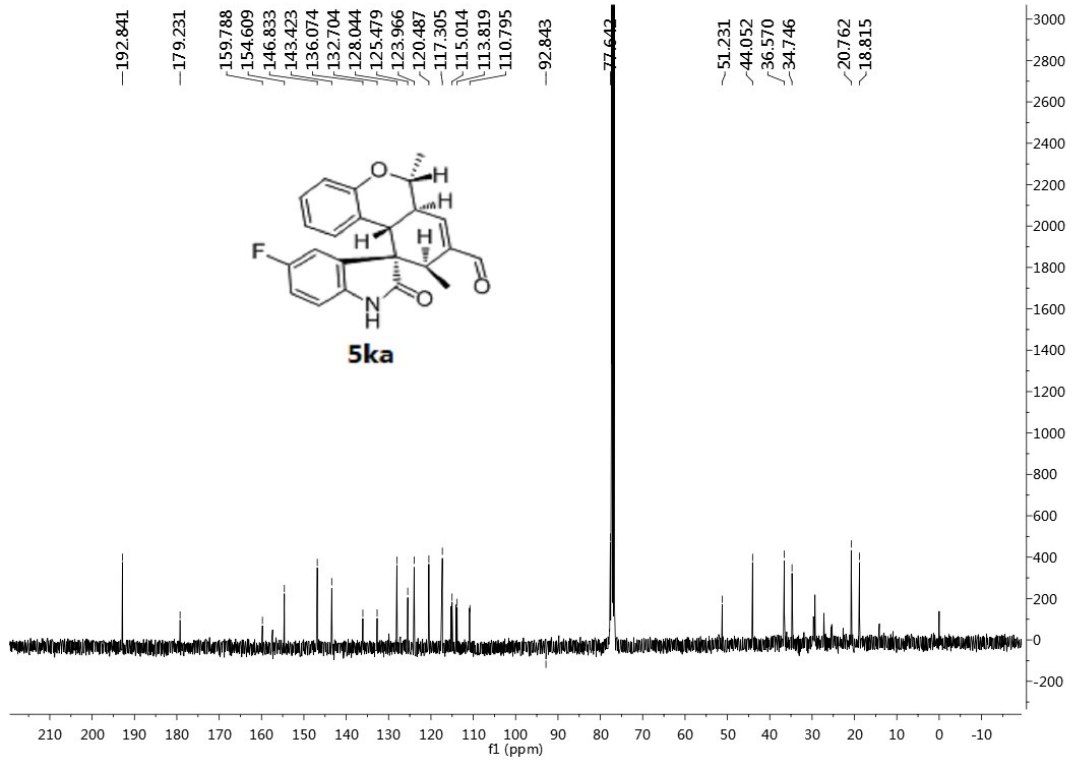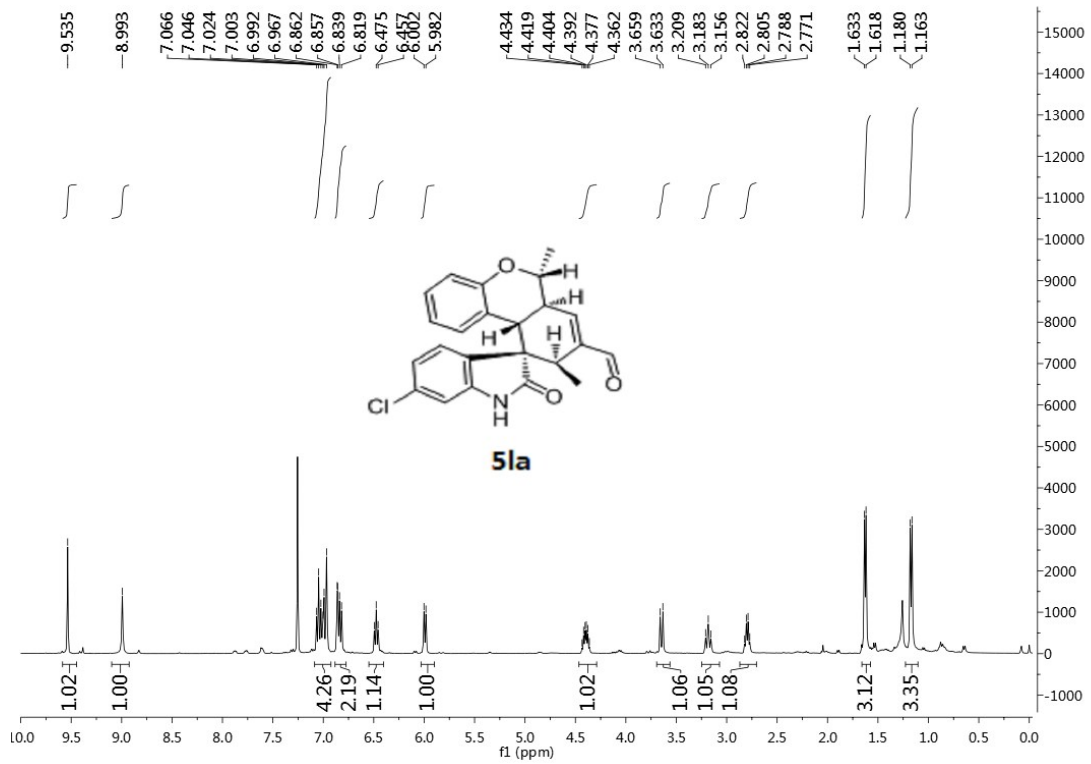

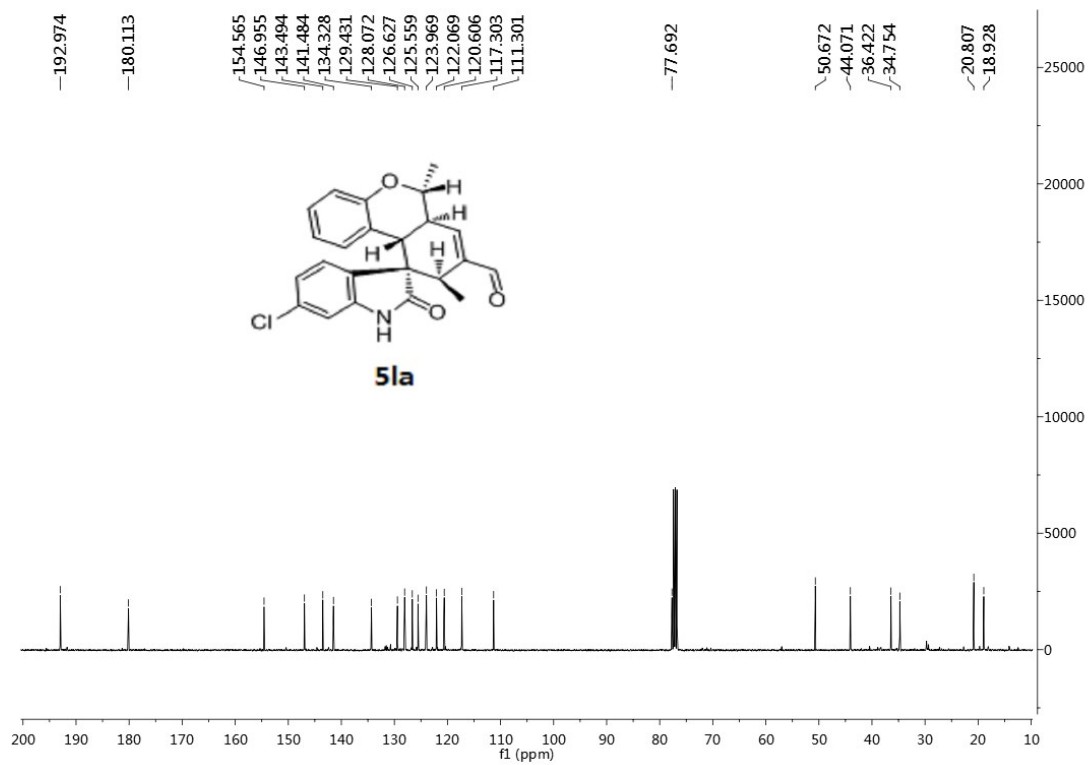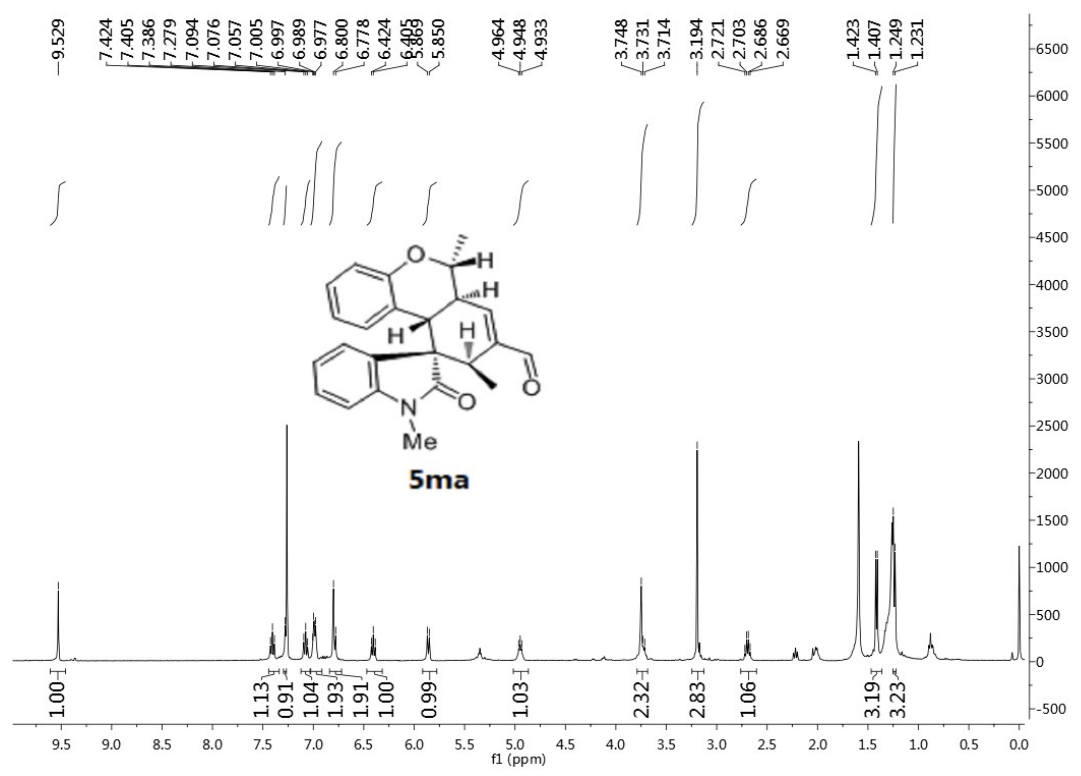



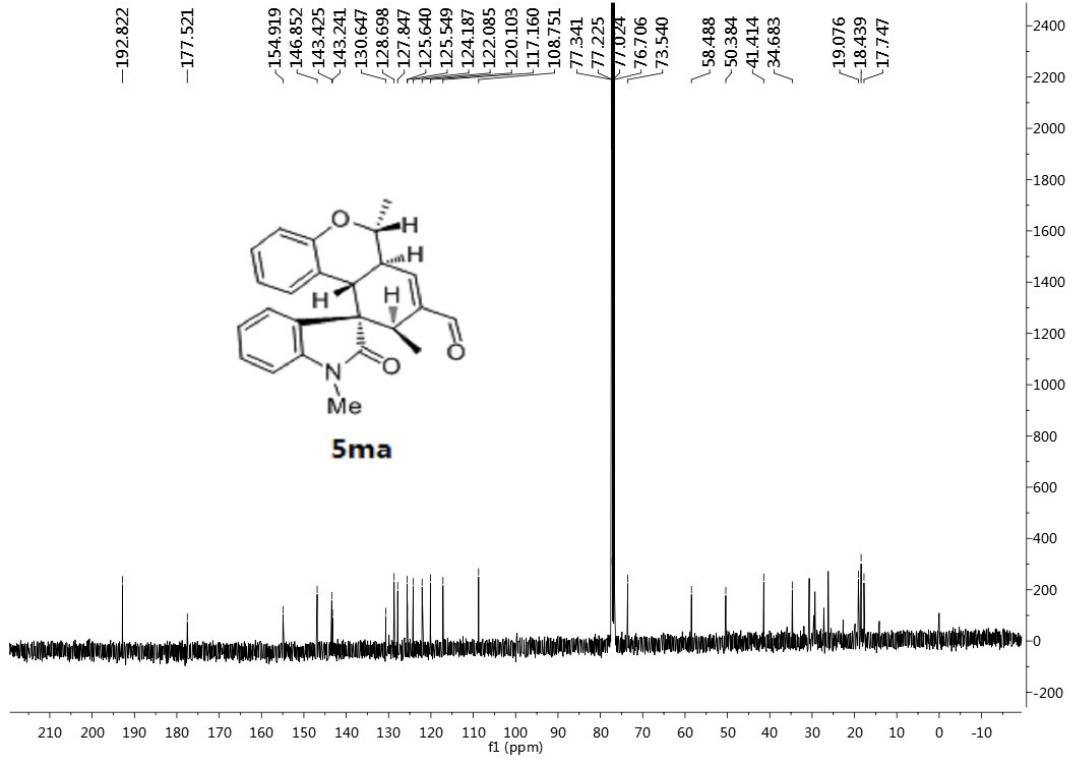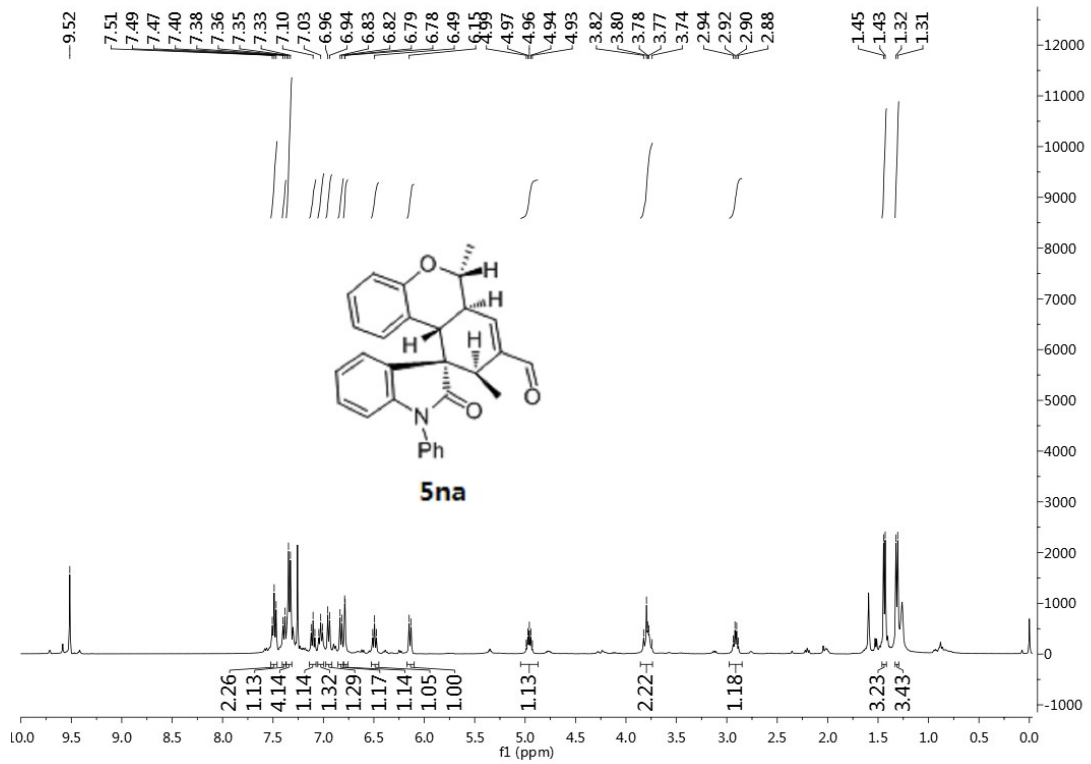

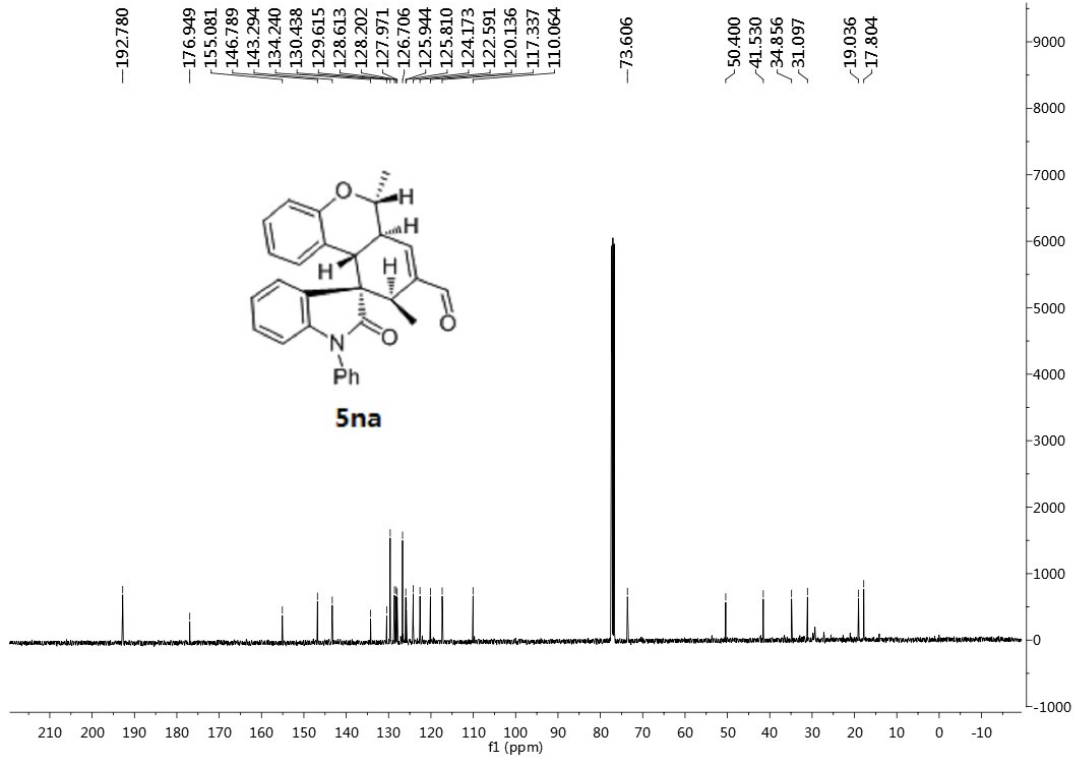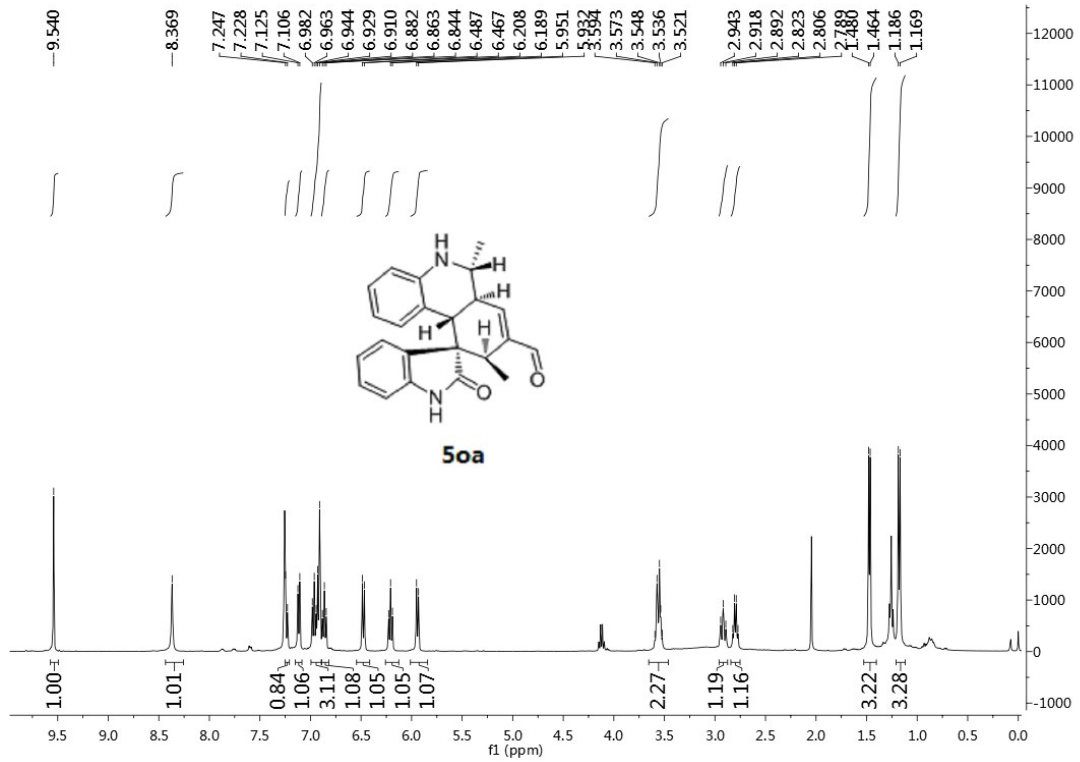

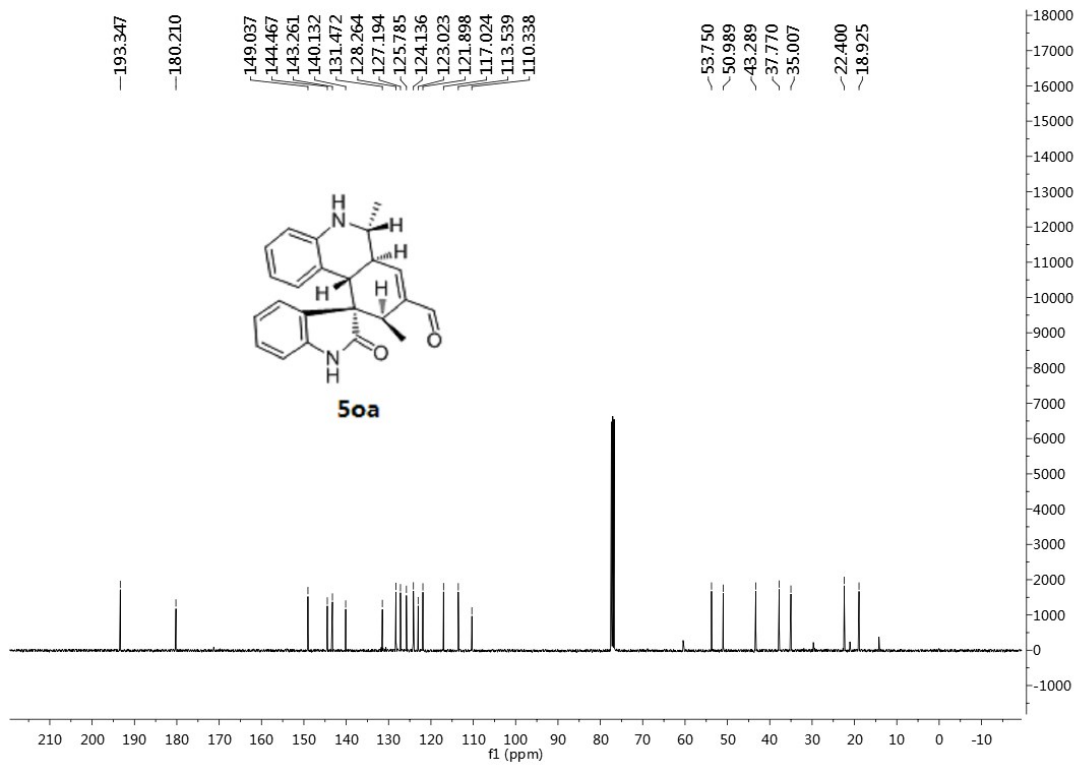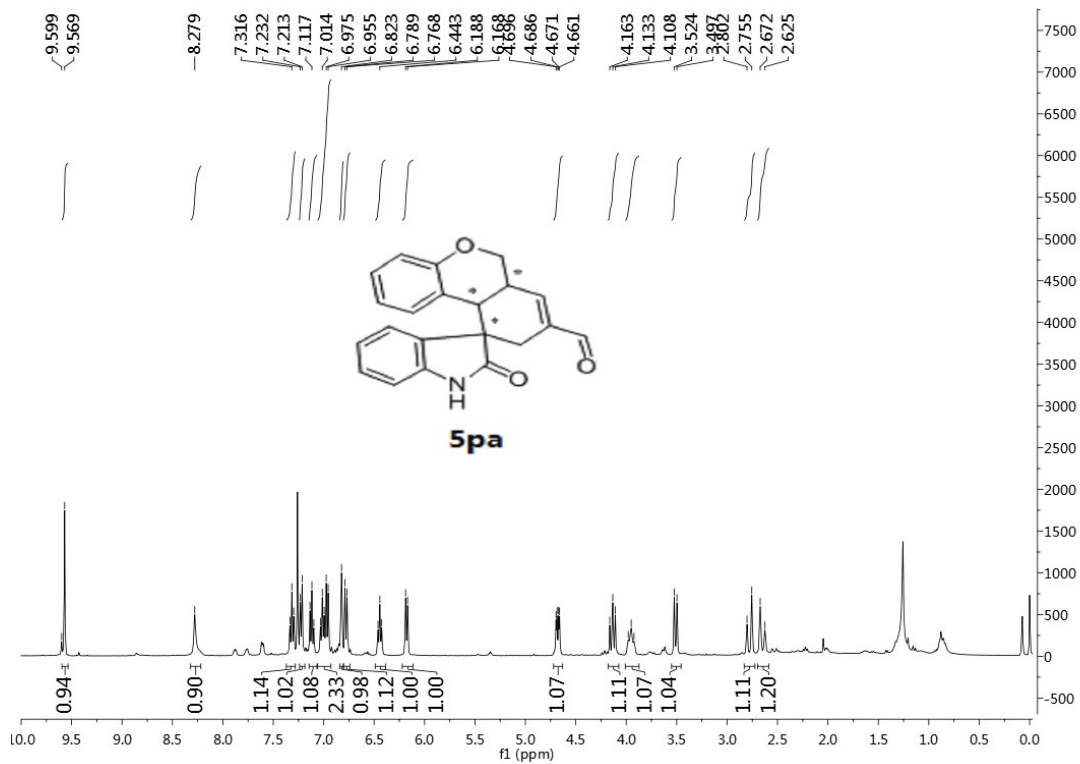

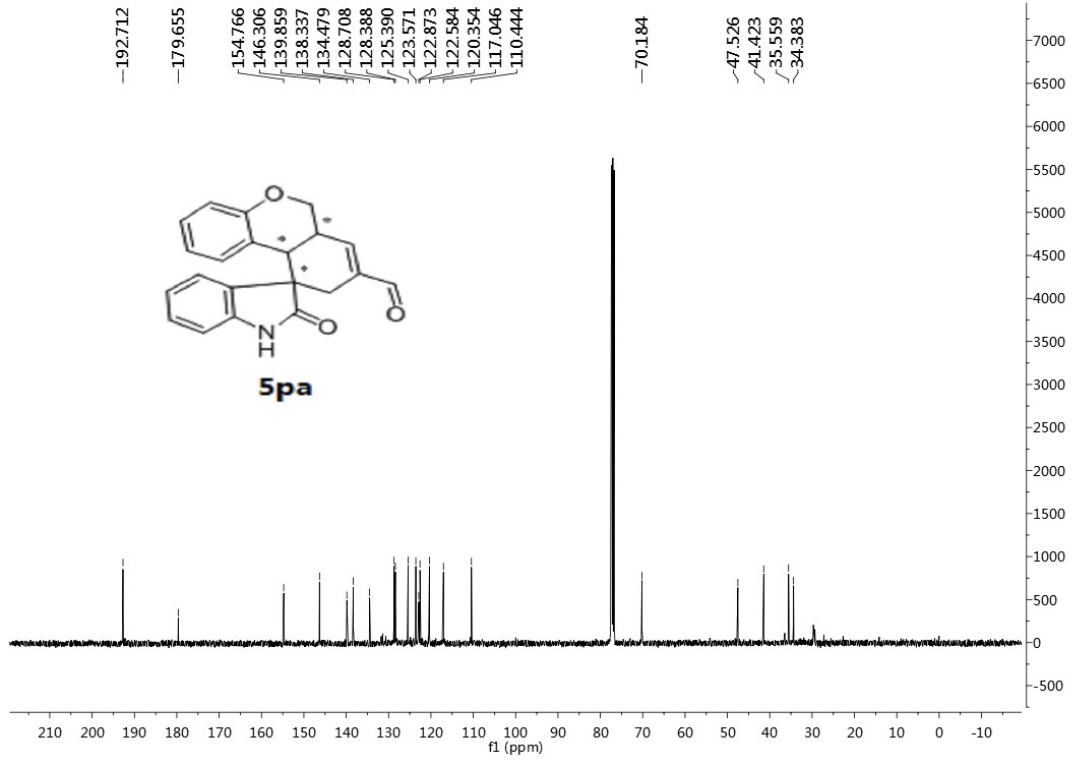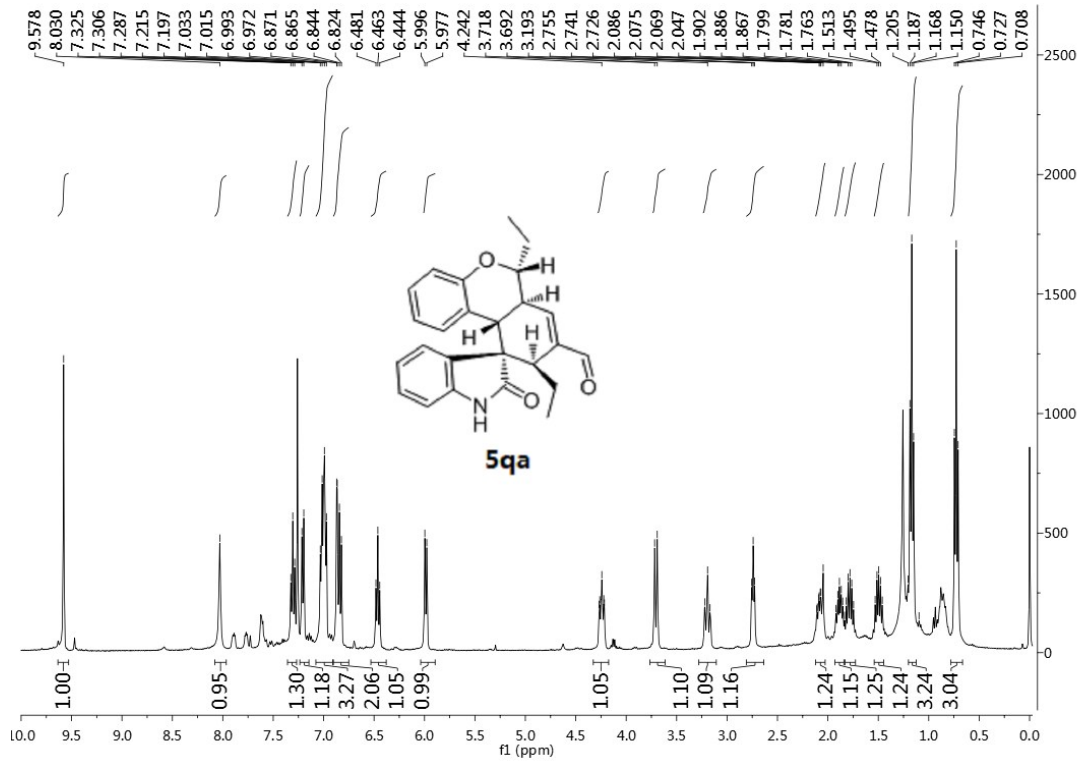

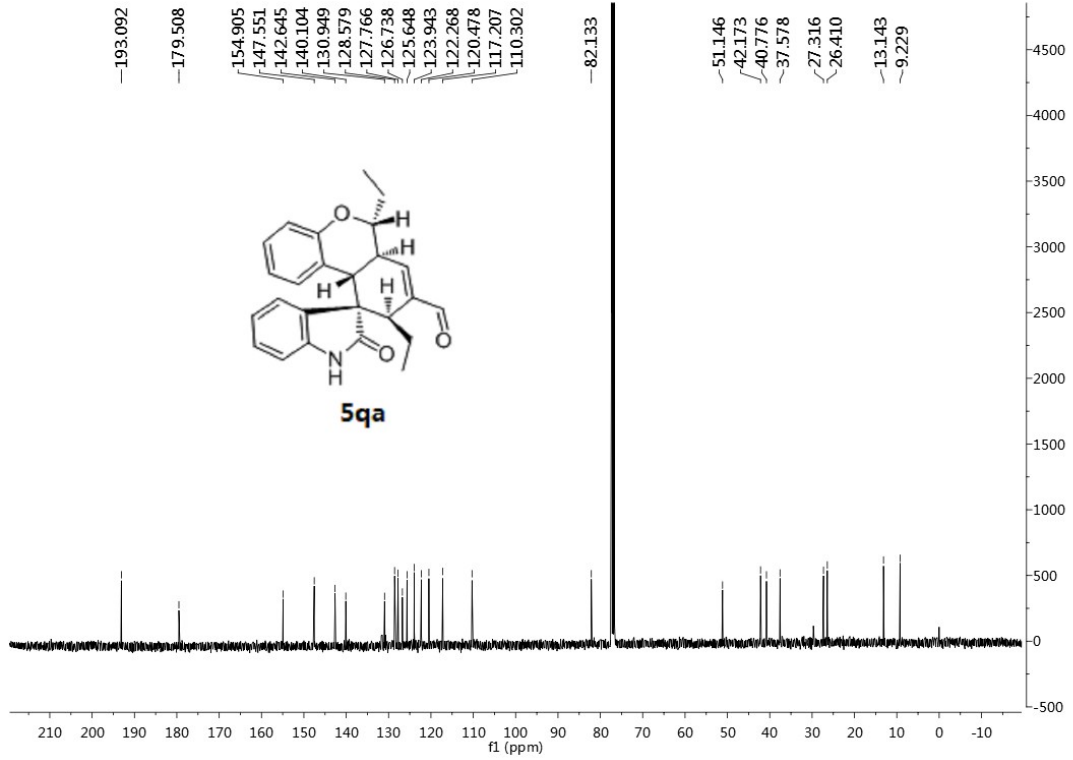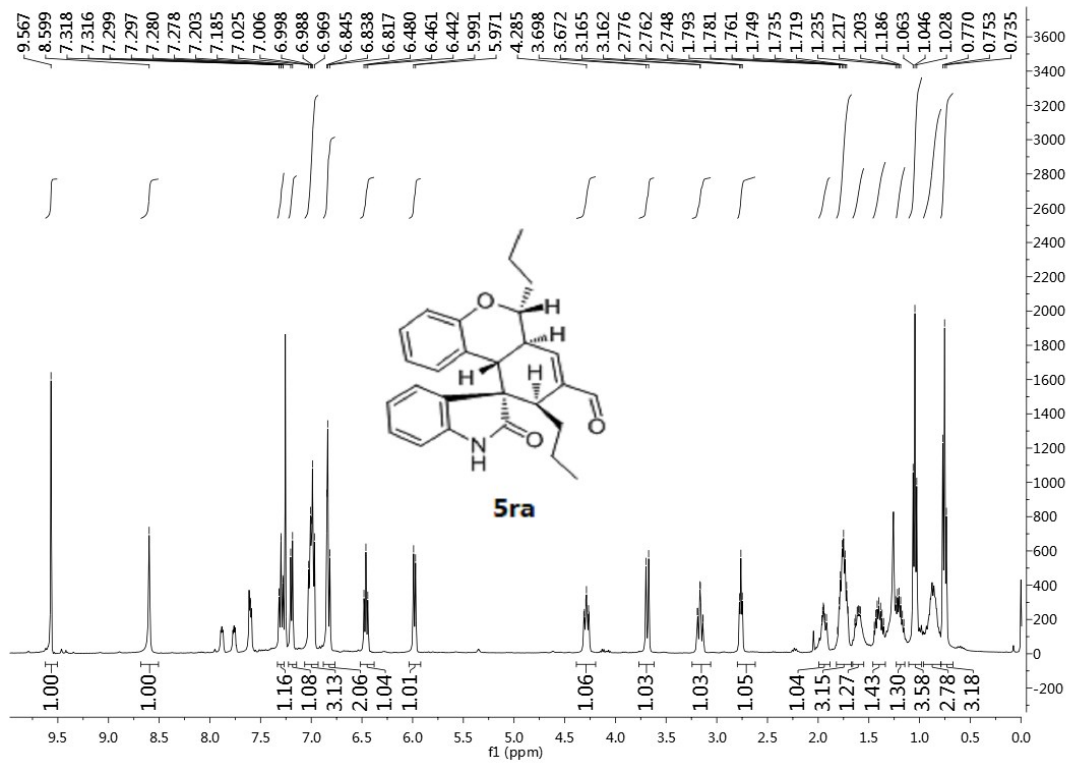

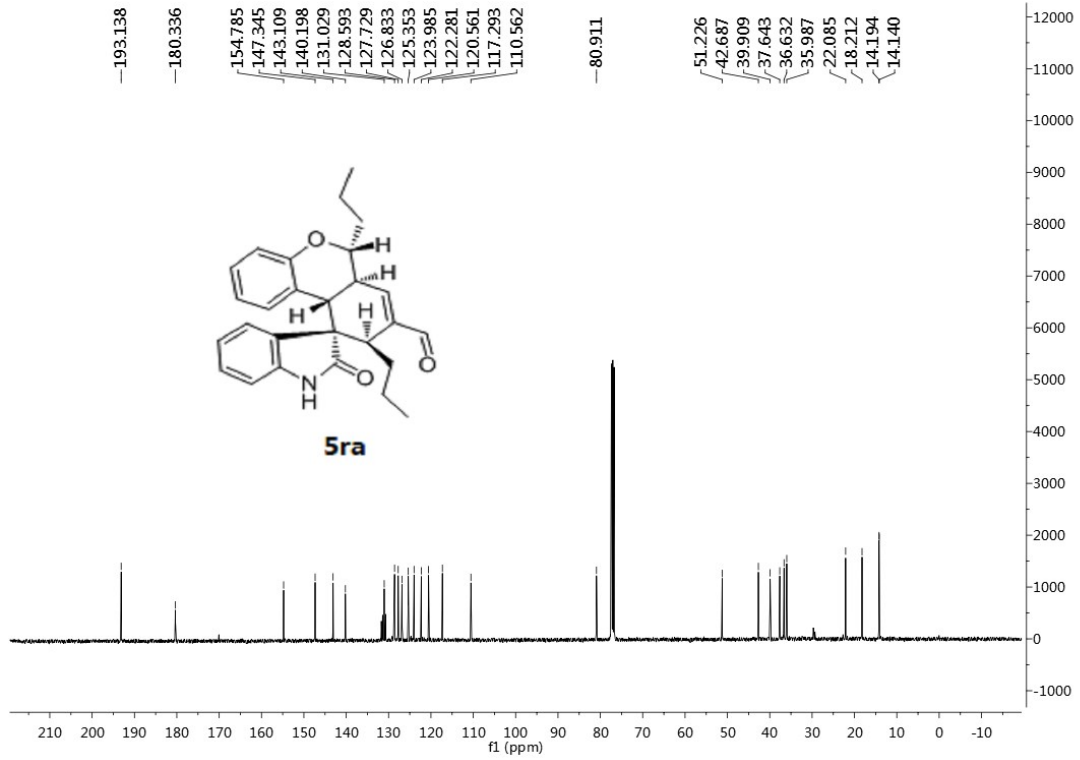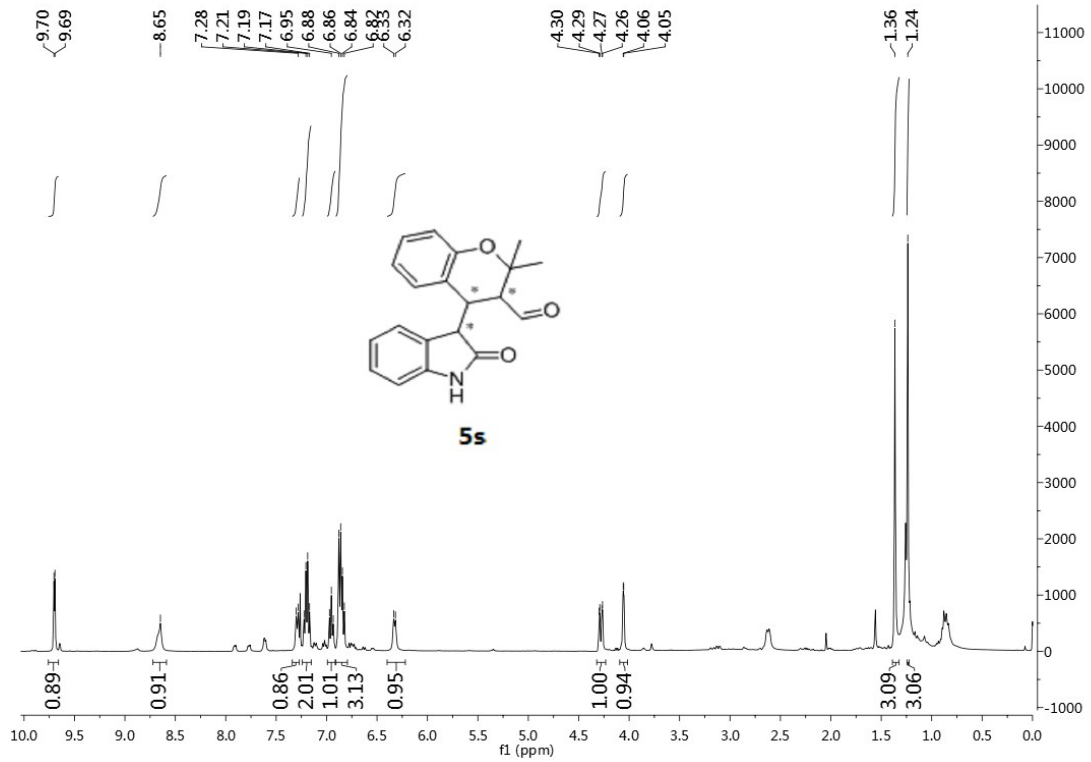

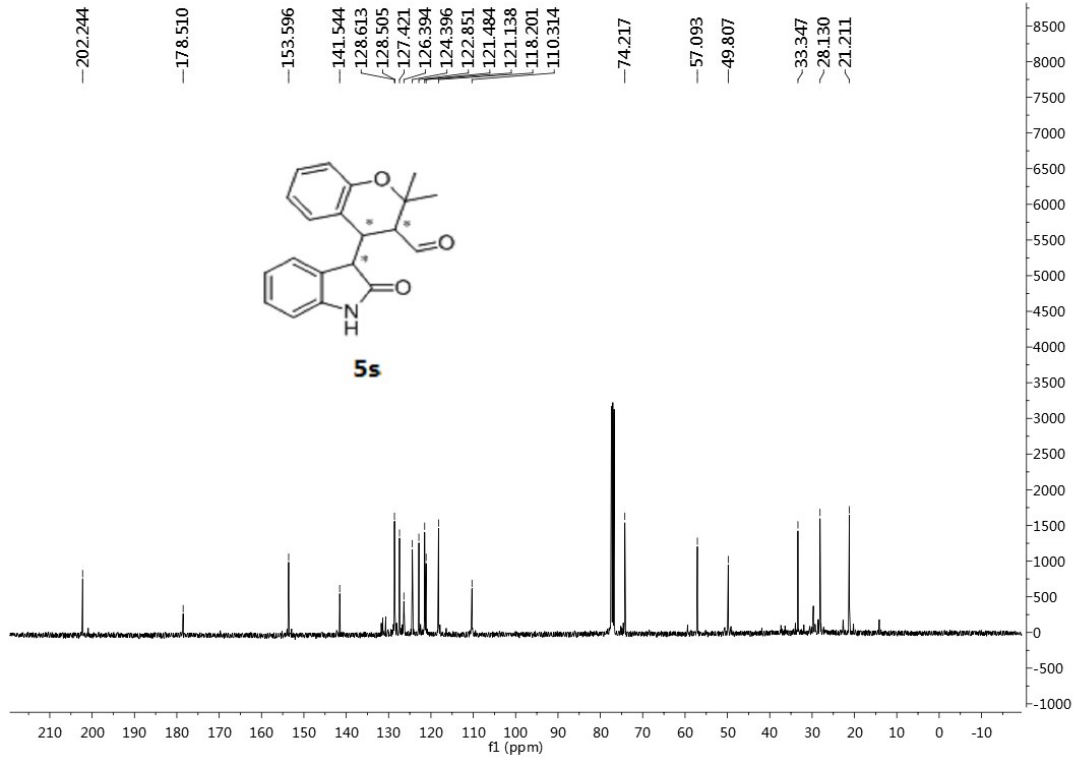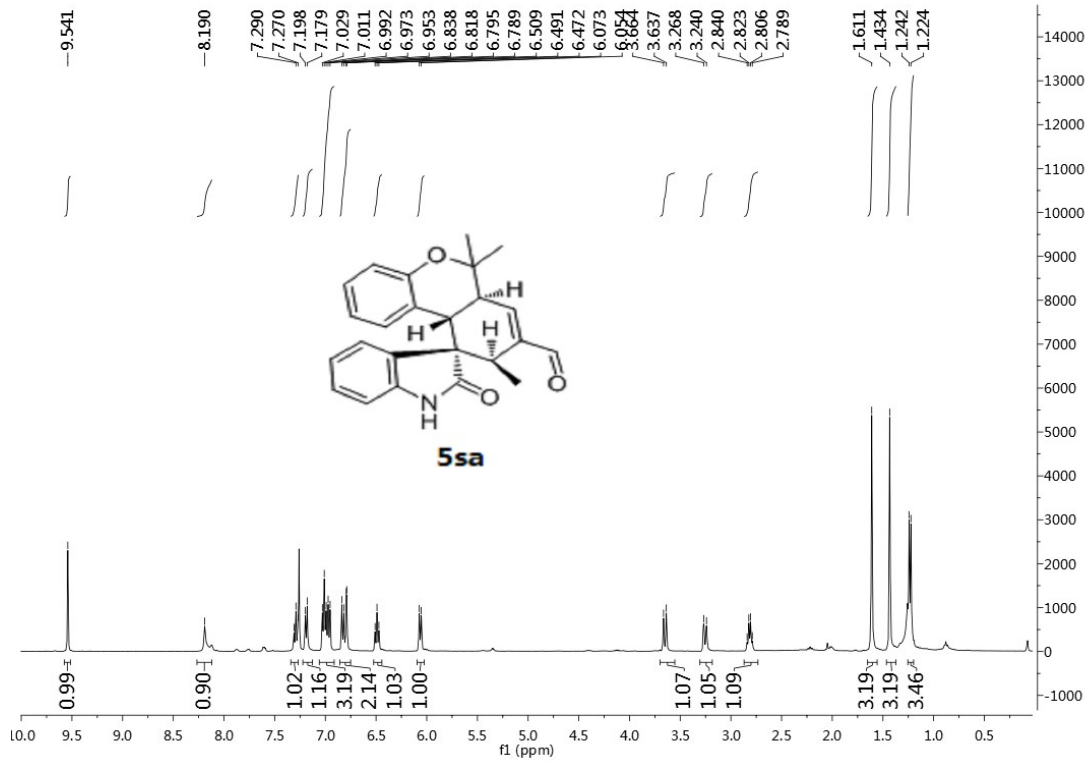

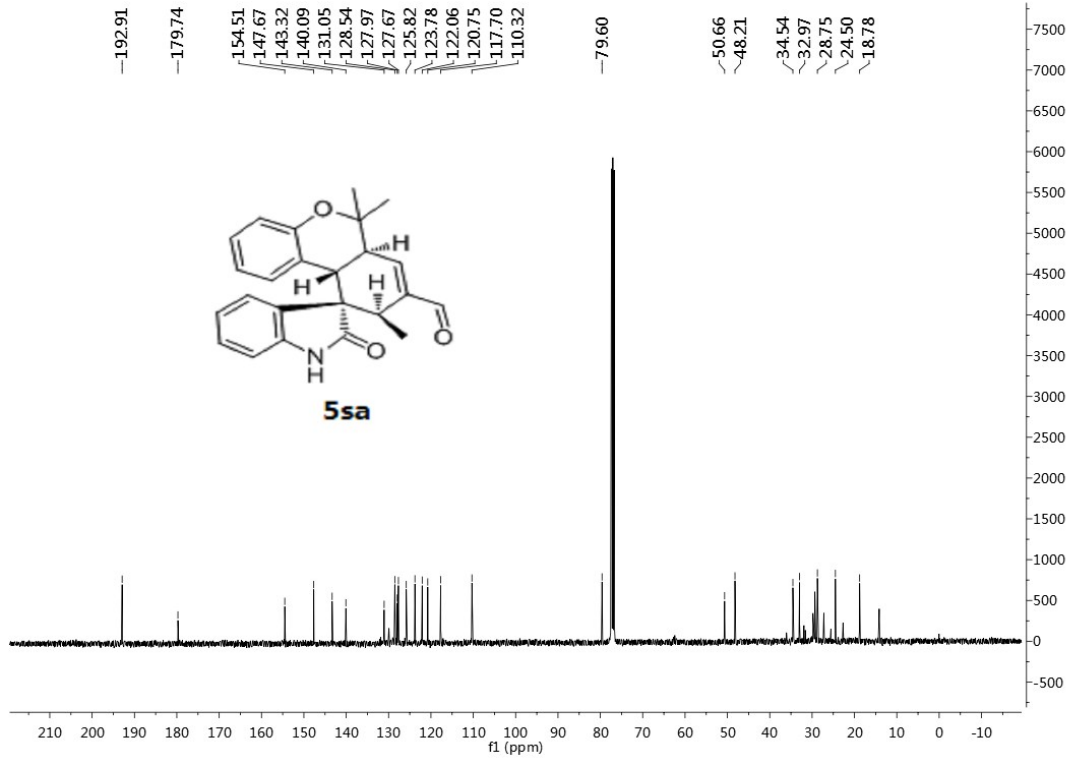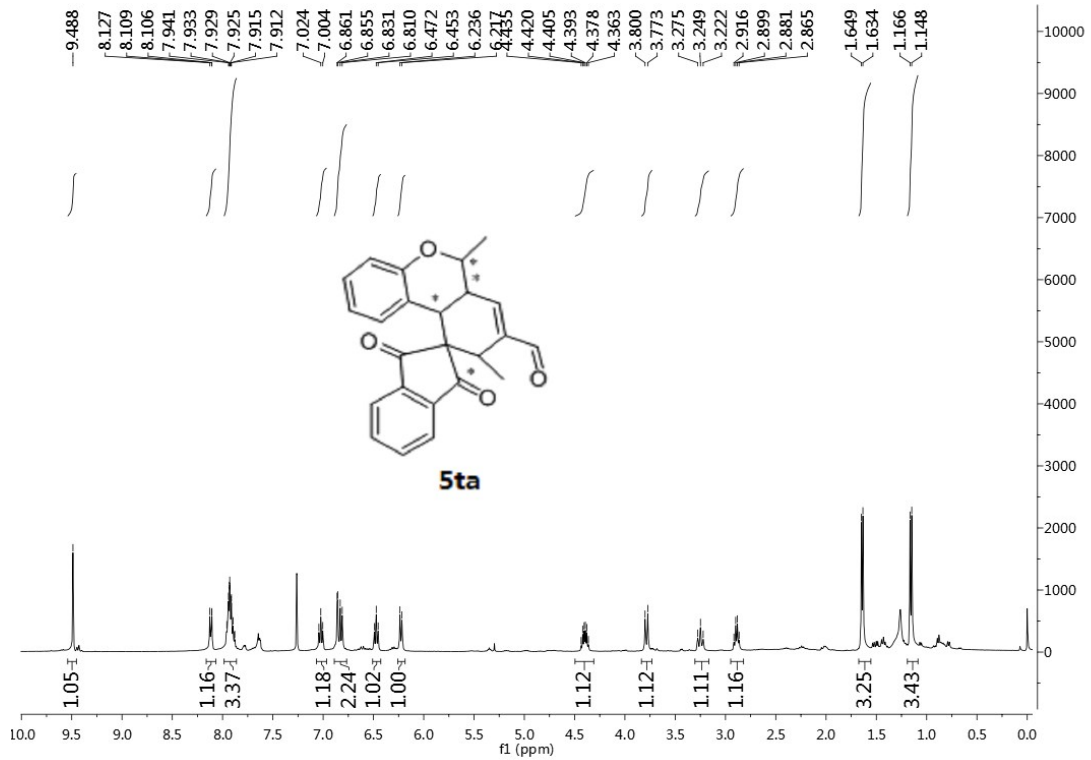



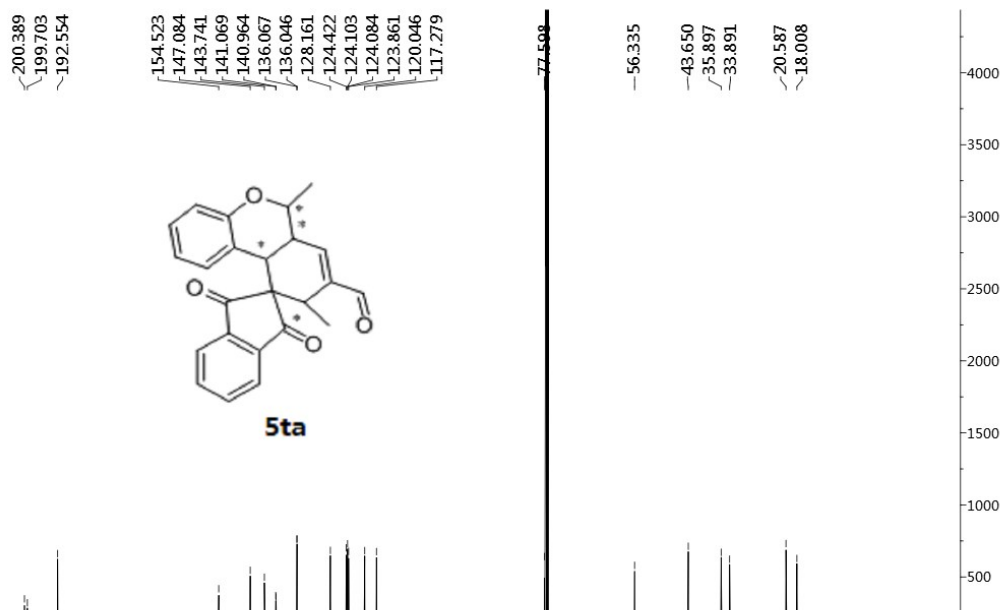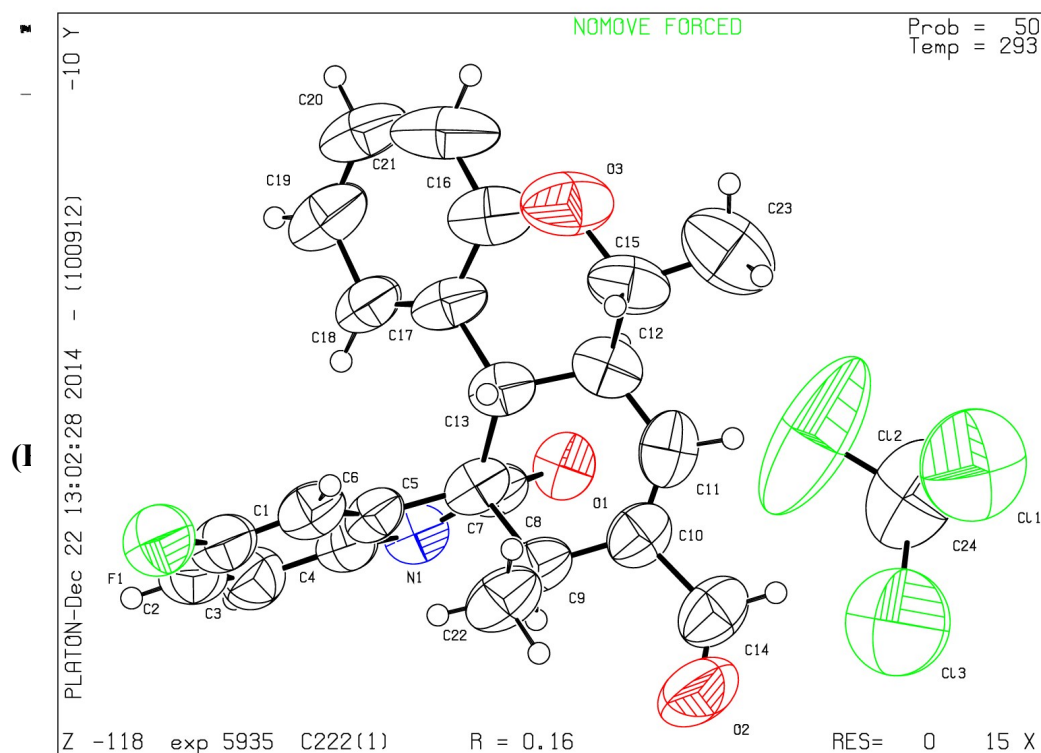

|                 |                |                    |              |
|-----------------|----------------|--------------------|--------------|
| Bond precision: | C-C = 0.0148 Å | Wavelength=1.54184 |              |
| Cell:           | a=12.9969(4)   | b=17.0693(8)       | c=23.6874(7) |
|                 | alpha=90       | beta=90            | gamma=90     |
| Temperature:    | 293 K          |                    |              |
|                 | Calculated     | Reported           |              |
| Volume          | 5255.0(3)      | 5255.0(3)          |              |
| Space group     | C 2 2 21       | C222(1)            |              |

|                    |                         |                                 |
|--------------------|-------------------------|---------------------------------|
| Moiety formula     | C23 H19 F N O3, C H Cl3 | C23 H19 F N O3, C H Cl3         |
| Sum formula        | C24 H20 Cl3 F N O3      | C24 H20 Cl3 F N O3              |
| Mr                 | 495.76                  | 495.76                          |
| Dx,g cm-3          | 1.253                   | 1.253                           |
| Z                  | 8                       | 8                               |
| Mu (mm-1)          | 3.421                   | 3.421                           |
| F000               | 2040.0                  | 2040.0                          |
| F000'              | 2054.10                 |                                 |
| h,k,lmax           | 15,20,28                | 15,20,28                        |
| Nref               | 4718[ 2615]             | 4044                            |
| Tmin,Tmax          | 0.696,0.686             | 0.684,0.705                     |
| Tmin'              | 0.632                   |                                 |
| Correction method= | MULTI-SCAN              |                                 |
| Data completeness= | 1.55/0.86               | Theta(max)= 67.250              |
| R(reflections)=    | 0.1558( 2392)           | wR2(reflections)= 0.3935( 4044) |
| S =                | 1.305                   | Npar= 292                       |
